# Supplementary material for: Psychological interventions for chronic non-specific low back pain: protocol of a systematic review with network meta-analysis
Source: PubMed Central journal article supplement — BMJ Open. 2020 Sep 17;10(9):e034996. doi: 10.1136/bmjopen-2019-034996 (PMC7500308; doi:10.1136/bmjopen-2019-034996), 2020-09-17
Supplement: bmjopen-2019-034996.draft_revisions.pdf [file bmjopen-2019-034996.draft_revisions.pdf]

# BMJ Open

BMJ Open is committed to open peer review. As part of this commitment we make the peer review history of every article we publish publicly available.

When an article is published we post the peer reviewers' comments and the authors' responses online. We also post the versions of the paper that were used during peer review. These are the versions that the peer review comments apply to.

The versions of the paper that follow are the versions that were submitted during the peer review process. They are not the versions of record or the final published versions. They should not be cited or distributed as the published version of this manuscript.

BMJ Open is an open access journal and the full, final, typeset and author-corrected version of record of the manuscript is available on our site with no access controls, subscription charges or pay-per-view fees (<http://bmjopen.bmj.com>).

If you have any questions on BMJ Open's open peer review process please email [info.bmjopen@bmj.com](mailto:info.bmjopen@bmj.com)

# BMJ Open

## Psychological interventions for chronic non-specific low back pain: protocol of a systematic review with network meta-analysis

|                               |                                                                                                                                                                                                                                                                                                                                                                                                                                                                                                                                                                                                                                                                                                |
|-------------------------------|------------------------------------------------------------------------------------------------------------------------------------------------------------------------------------------------------------------------------------------------------------------------------------------------------------------------------------------------------------------------------------------------------------------------------------------------------------------------------------------------------------------------------------------------------------------------------------------------------------------------------------------------------------------------------------------------|
| Journal:                      | <i>BMJ Open</i>                                                                                                                                                                                                                                                                                                                                                                                                                                                                                                                                                                                                                                                                                |
| Manuscript ID                 | bmjopen-2019-034996                                                                                                                                                                                                                                                                                                                                                                                                                                                                                                                                                                                                                                                                            |
| Article Type:                 | Protocol                                                                                                                                                                                                                                                                                                                                                                                                                                                                                                                                                                                                                                                                                       |
| Date Submitted by the Author: | 15-Oct-2019                                                                                                                                                                                                                                                                                                                                                                                                                                                                                                                                                                                                                                                                                    |
| Complete List of Authors:     | Ho, Emma; The University of Sydney, School of Physiotherapy<br>Ferreira, Manuela; University of Sydney Institute of Bone and Joint Research,<br>Chen, Lingxiao; The University of Sydney Institute of Bone and Joint Research,<br>Simic, Milena; The University of Sydney, Physiotherapy<br>Ashton-James, Claire; The University of Sydney, Pain Management Research Institute, Faculty of Medicine and Health<br>Comachio, Josielli ; University of Sao Paulo, Department of Speech, Physical Therapy and Occupational Therapy, School of Medicine<br>Hayden, Jill; Dalhousie University, Community Health & Epidemiology<br>Ferreira, Paulo; University of Sydney, Faculty of Health Science |
| Keywords:                     | Back pain < ORTHOPAEDIC & TRAUMA SURGERY, Musculoskeletal disorders < ORTHOPAEDIC & TRAUMA SURGERY, PSYCHIATRY                                                                                                                                                                                                                                                                                                                                                                                                                                                                                                                                                                                 |
|                               |                                                                                                                                                                                                                                                                                                                                                                                                                                                                                                                                                                                                                                                                                                |

SCHOLARONE™  
Manuscripts

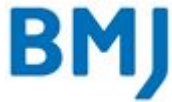

I, the Submitting Author has the right to grant and does grant on behalf of all authors of the Work (as defined in the below author licence), an exclusive licence and/or a non-exclusive licence for contributions from authors who are: i) UK Crown employees; ii) where BMJ has agreed a CC-BY licence shall apply, and/or iii) in accordance with the terms applicable for US Federal Government officers or employees acting as part of their official duties; on a worldwide, perpetual, irrevocable, royalty-free basis to BMJ Publishing Group Ltd ("BMJ") its licensees and where the relevant Journal is co-owned by BMJ to the co-owners of the Journal, to publish the Work in this journal and any other BMJ products and to exploit all rights, as set out in our [licence](#).

The Submitting Author accepts and understands that any supply made under these terms is made by BMJ to the Submitting Author unless you are acting as an employee on behalf of your employer or a postgraduate student of an affiliated institution which is paying any applicable article publishing charge ("APC") for Open Access articles. Where the Submitting Author wishes to make the Work available on an Open Access basis (and intends to pay the relevant APC), the terms of reuse of such Open Access shall be governed by a Creative Commons licence – details of these licences and which [Creative Commons](#) licence will apply to this Work are set out in our licence referred to above.

Other than as permitted in any relevant BMJ Author's Self Archiving Policies, I confirm this Work has not been accepted for publication elsewhere, is not being considered for publication elsewhere and does not duplicate material already published. I confirm all authors consent to publication of this Work and authorise the granting of this licence.

1  
2  
3 **Psychological interventions for chronic non-specific low back pain: protocol of a**  
4 **systematic review with network meta-analysis.**  
5  
6  
7  
8

9 Emma Kwan-Yee Ho<sup>a</sup>, Manuela Loureiro Ferreira<sup>b</sup>, Lingxiao Chen<sup>b</sup> Milena Simic<sup>a</sup>, Claire  
10 Ashton-James<sup>c</sup>, Josielli Comachio<sup>d</sup>, Jill Alison Hayden<sup>e</sup>, Paulo Henrique Ferreira<sup>a</sup>  
11

12 <sup>a</sup>The University of Sydney, Faculty of Medicine and Health, Sydney, NSW, Australia.  
13

14 <sup>b</sup>The University of Sydney, Institute of Bone and Joint Research, Northern Clinical School,  
15 Faculty of Medicine and Health, Sydney, NSW, Australia.  
16

17 <sup>c</sup>The University of Sydney, Pain Management Research Institute, Faculty of Medicine and  
18 Health, Sydney, NSW, Australia.  
19

20 <sup>d</sup>Department of Speech, Physical Therapy and Occupational Therapy, School of Medicine,  
21 University of Sao Paulo, Sao Paulo, Brazil.  
22

23 <sup>e</sup>Department of Community Health & Epidemiology, Dalhousie University, Halifax, Nova  
24 Scotia, Canada.  
25  
26  
27  
28

29 **Address for Correspondence:**

30 Ms. Emma Kwan-Yee Ho, Faculty of Medicine and Health  
31 University of Sydney, PO Box 170 Lidcombe 1825 AUSTRALIA  
32  
33 Tel: +61 434 596 855  
34  
35 E-mail: emma.ho@sydney.edu.au  
36  
37  
38  
39

40 **Word count:** 2529  
41  
42  
43

44 **Funding Sources:** This research received no specific grant from any funding agency in the  
45 public, commercial or not-for-profit sectors. PHF is funded by an NHMRC Fellowship and a  
46 Sydney University SOAR fellowship. MLF is funded by an NHMRC Fellowship and a  
47 Sydney University SOAR fellowship. MS is funded by a Sydney University SOAR  
48 fellowship. LC is funded by Northern Clinical School Higher Degree Research Support  
49 Scholarship. EKH is funded by an Australian Government Research Training Program  
50 Scholarship.  
51  
52  
53  
54  
55  
56  
57

58 **Conflict of Interest:**

59 None declared.  
60

## ABSTRACT

**Introduction:** Psychological factors such as fear avoidance beliefs, depression, anxiety, catastrophic thinking, and familial and social stress, have been associated with high disability levels in chronic low back pain (LBP). Guidelines endorse the integration of psychological interventions in the management of chronic LBP; however, uncertainty surrounds the comparative effectiveness of different psychological approaches. We will perform a systematic review with a network meta-analysis (NMA) approach to compare and rank a comprehensive range of psychological interventions for improving disability and pain intensity in adults with chronic non-specific LBP.

**Methods and analysis:** We will search electronic databases (MEDLINE, EMBASE, PsycINFO, Cochrane Central Register of Controlled Trials, Web of Science, SCOPUS and CINAHL) for randomised controlled trials comparing psychological interventions to any comparison interventions in adults with chronic non-specific LBP. There will be no restriction on language or publication year. The primary outcomes will include disability and pain intensity, and secondary outcomes will include health-related quality of life and fear avoidance. Risk of bias will be assessed using the Revised Cochrane risk-of-bias tool for randomized trials (RoB 2) tool and quality of evidence will be assessed using Cochrane's Confidence in NMA (CINeMA) framework. We will conduct a random-effects NMA using a frequentist approach to estimate relative treatment rankings according to the mean rank and surface under the cumulative ranking curve values. All analyses will be performed in Stata and R.

**Ethics and dissemination:** No ethical approval is required. The research will be published in a peer-reviewed journal.

**PROSPERO registration number:** CRD4201913807

**Key Words:** back pain, low back pain, musculoskeletal disorders, chronic, psychological, psychiatry, network meta-analysis, systematic review.

### Strengths and limitations of this study

- This is the first systematic review using an NMA design to compare different types of psychological interventions for improving disability and pain intensity in people with chronic non-specific LBP.
- The main strength is the NMA design will allow for the comprehensive comparison and ranking of multiple psychological interventions simultaneously, which was not possible with previous systematic reviews that only conducted pair-wise meta-analyses.
- An additional strength is that in comparison to previous pair-wise systematic reviews, the NMA design will allow for the inclusion and synthesis of a larger number of studies investigating a wider range of psychological interventions.
- The main limitation is that we anticipate smaller nodes for emerging types of psychological interventions (e.g. acceptance and commitment therapy, cognitive functional therapy), due to the paucity of studies investigating these interventions in chronic LBP populations.

1  
2  
3  
4  
5  
6  
7  
8  
9  
10  
11  
12  
13  
14  
15  
16  
17  
18  
19  
20  
21  
22  
23  
24  
25  
26  
27  
28  
29  
30  
31  
32  
33  
34  
35  
36  
37  
38  
39  
40  
41  
42  
43  
44  
45  
46  
47  
48  
49  
50  
51  
52  
53  
54  
55  
56  
57  
58  
59  
60

## **Psychological interventions for chronic non-specific low back pain: protocol of a systematic review with network meta-analysis.**

Low back pain (LBP) is one of largest contributors to disability worldwide [1, 2] and is associated with substantial health and economic burden relating to increased health-care utilisation costs, work absenteeism and productivity loss.[3] The challenge associated with treating chronic non-specific LBP lies in the complex multifactorial interaction between genetic, biophysical, psychosocial, health and lifestyle factors which are largely individualistic.[4, 5] Particularly, psychological factors such as fear avoidance beliefs, depression, anxiety, catastrophic thinking, and familial and social stress [4] are often poorly identified and inadequately addressed,[6] and have been shown to alter pain processing pathways, perceptions, and coping responses.[5, 7] The influence of these factors in chronic non-specific LBP have been found to increase the risk of disability,[8, 9] which commonly manifests as reduced functional capacity, avoidance of usual activities including work, and impaired societal and recreational participation.[5, 10]

Psychological interventions in chronic pain conditions aim to reduce pain-related distress and disability by changing negative beliefs, behaviours and attitudes. These interventions specifically target the environmental contingencies and maladaptive cognitive and emotional processes underpinning pain in order to promote self-efficacy and increased function.[11, 12] Numerous studies investigating the use of psychological interventions for managing chronic non-specific LBP have shown promising evidence for improved overall functioning, pain experience, depression, cognitive appraisal, health-related quality of life and decreased health care utilisation.[11-14] International clinical guidelines consistently endorse the integration of psychological interventions in the management of chronic LBP.[15-19] In fact, a recent and coordinated global call for better management of LBP, led by international LBP experts and published in the *Lancet*, recommends that psychological approaches – namely cognitive behavioural therapy or mindfulness-based stress reduction – should be delivered in isolation or incorporated into multidisciplinary rehabilitation for chronic non-specific LBP.[20]

However, it remains unclear which psychological interventions offer better benefits for managing chronic LBP, as previous systematic reviews have only investigated a small selection of the available approaches.[11-13, 21-23] These reviews have resulted in numerous separate pair-wise comparisons of common interventions such as cognitive behavioural

1  
2  
3 therapy and biofeedback,[11-13, 21-23] though vigorous attempts to synthesise these separate  
4 results and compare them with emerging, less-investigated psychological approaches (e.g.  
5 health-coaching, cognitive functional therapy, acceptance and commitment therapy) have not  
6 been made. As a result, uncertainty surrounds which approaches policy makers should  
7 recommend to clinicians for managing chronic LBP. Undoubtedly, the uncertainty  
8 exacerbates clinicians' reported lack of confidence and perceived competence in addressing  
9 psychological factors in this population.[24, 25] A network meta-analysis (NMA) is a robust  
10 analytical design that synthesises direct and indirect evidence to simultaneously compare and  
11 rank numerous intervention arms across all relevant studies within a single, coherent  
12 treatment network based on their relative effectiveness.[26] Indirect evidence allows for the  
13 comparison of emerging, less-investigated interventions despite the paucity of head-to-head  
14 trials. As such, the current research aims to perform a NMA to vigorously compare and rank  
15 a comprehensive range of psychological interventions for improving disability, pain intensity,  
16 health-related quality of life and fear avoidance in chronic non-specific LBP. This will  
17 provide crucial evidence to inform clinicians, patients, and policy makers on which  
18 psychological interventions offer better benefits for managing chronic LBP.  
19  
20  
21  
22  
23  
24  
25  
26  
27  
28  
29  
30  
31  
32

## 33 **METHODS AND ANALYSIS**

### 34 **Study design**

35 This protocol was written in accordance with the Preferred Reporting Items for Systematic  
36 Reviews and Meta-Analyses (PRISMA) statement for systematic reviews.[27] The systematic  
37 review protocol has been registered with the International Prospective Register of Systematic  
38 Reviews (PROSPERO): CRD42019138074.  
39  
40  
41  
42  
43  
44

### 45 **Eligibility criteria**

#### 46 **Types of studies**

47 We will include all published parallel and cluster randomised controlled trials (RCT)  
48 comparing psychological interventions to any comparison interventions. We will also include  
49 cross-over RCTs, using data collected before the washout period. There will be no restriction  
50 on length of follow-up. Observational studies, non-randomised trials, and studies that have  
51 not been published as full-text articles in peer-reviewed scientific journals will be excluded.  
52  
53  
54  
55  
56  
57  
58

#### 59 **Types of participants**



1  
2  
3 Eligible studies will include adults experiencing chronic non-specific LBP, with or without  
4 the presence of radicular leg pain. Chronic non-specific LBP will be defined according to  
5 NICE UK guidelines as pain in the back between the bottom of the rib cage and buttocks  
6 crease with no known pathoanatomical cause, for greater than 12 weeks in duration.[15, 28]  
7  
8 Studies including participants with serious pathologies (e.g. spinal stenosis, malignancy,  
9 trauma, vertebral fracture, infection, inflammatory disorders) will be excluded.  
10  
11  
12  
13  
14

#### 15 Types of interventions and comparators

16  
17 Psychological interventions will be defined as interventions that explicitly deliver a  
18 psychological component as part of treatment,[22] including but not limited to cognitive  
19 behavioural therapeutic strategies [relaxation, graded exposure (desensitisation), imagery  
20 (distraction), goal setting], mindfulness-based stress reduction, cognitive functional therapy,  
21 health-coaching, biofeedback, pain neuroscience education, and counselling directly  
22 employing principles of psychological theory. Comparison interventions will include direct  
23 comparisons between different types of psychological interventions, waiting list control,  
24 usual care, exercise regimes (not accompanied by cognitive-behavioural strategies), or other  
25 types of conservative management.  
26  
27  
28  
29  
30  
31  
32  
33

#### 34 Types of outcome measures

35  
36 The primary outcomes of interest include:

- 37 1. Disability, commonly measured by the Oswestry Disability Index (ODI), Roland  
38 Morris Disability Questionnaire (RMDQ), Core Outcome Measures Index (COMI),  
39 Quebec Back Pain Disability Index (QBPDQ).[29] For studies providing more than  
40 one instrument, ODI will be used as first choice, followed by RMDQ, COMI,  
41 QBPDQ,[29-31] or other tools that have been proposed in peer-reviewed journals.  
42  
43 2. Pain intensity, commonly measured by the Numeric Rating Scale (NRS) and Visual  
44 Analogue Scale (VAS).[30] For studies providing more than one instrument, NRS  
45 will be used as the first choice.[30]  
46  
47  
48  
49  
50

51 Secondary outcomes of interest include:

- 52 1. Health-related quality of life (HR-QoL), commonly measured by the 12-Item or 36-  
53 Item Short Form (SF-12, SF-36), EuroQol five-dimension (EQ-5D), Nottingham  
54 Health Profile (NHP) and 10-Item Patient-Reported Outcomes Measurement  
55 Information System Global Health Short Form (PROMIS-GH-10).[30, 31] For studies  
56  
57  
58  
59  
60

1  
2  
3 providing more than one instrument, SF-12 will be used as first choice, followed by  
4 PROMIS-GH-10, EQ-5D, SF-36, and NHP.[30, 31]

- 5  
6  
7 2. Fear avoidance, commonly measured by the Fear-Avoidance Beliefs Questionnaire  
8 (FABQ), Pain Catastrophizing Scale (PCS), Tampa Scale for Kinesiophobia (TSK)  
9 and Fear of Pain Questionnaire (FPQ).[32] For studies providing more than one  
10 instrument, FABQ will be used as first choice, followed by PCS, TSK, FPQ,[32] or  
11 other tools that have been proposed in peer-reviewed journals.  
12  
13  
14  
15  
16

## 17 **Study selection**

### 18 Electronic searches

19 The following databases will be searched for eligible studies: MEDLINE, EMBASE,  
20 PsycINFO, Cochrane Central Register of Controlled Trials, Web of Science, SCOPUS and  
21 CINAHL. Search concepts will include language and keywords for: randomised controlled  
22 trial, low back pain, and terms relating to psychological interventions, according to the  
23 eligibility criteria defined earlier in the protocol. A full MEDLINE search strategy can be  
24 found in Appendix A of this protocol. There will be no restriction on publication year or  
25 language.  
26  
27  
28  
29  
30  
31  
32

### 33 Additional search strategies

34 We will search reference lists and perform citation tracking of included studies and relevant  
35 systematic reviews [11-13, 21-23] and clinical guidelines [15-17] to identify additional  
36 eligible studies. We will also search clinicaltrials.gov to identify registered trials and contact  
37 authors for related publications to minimise possible omission.  
38  
39  
40  
41  
42  
43  
44

### 45 Identification and selection of studies

46 Citations identified by our search strategy will be managed using Covidence.[33] Two  
47 reviewers will independently screen citation titles and abstracts to identify potentially eligible  
48 studies. Disagreements will be resolved by consensus or a third reviewer. A PRISMA flow-  
49 diagram will be presented to map the number of records included and excluded during the  
50 study selection process, with reasons for exclusions reported.  
51  
52  
53  
54  
55

## 56 **Data extraction**

57 Two reviewers will independently extract data from the included studies using a pre-designed  
58 data extraction form in Covidence.[33] Disagreements will be resolved by consensus or a  
59  
60

1  
2  
3 third reviewer. The following data will be extracted: publication characteristics (e.g. first  
4 author, publication year, journal, funding, location); study design characteristics (e.g. number  
5 of participants randomised, durations of follow-up, percentage of dropouts); patient  
6 characteristics (e.g. age, gender, body mass index, pain intensity, socioeconomic status,  
7 comorbidities); intervention and comparator characteristics (e.g. type of psychological or  
8 comparison intervention, intervention dosage and frequency); and primary and secondary  
9 outcome measures (including outcome definitions, summary data related to treatment effects,  
10 measurement tools). Data will be classified according to short-term (<6 months), mid-term  
11 (6-12 months) or long-term follow-up ( $\geq 12$  months), and NMA will be performed at each  
12 time-point separately. Authors will be contacted for additional information where necessary.  
13  
14  
15  
16  
17  
18  
19  
20  
21

22 Following data collection, we will consult clinical experts from the review team to establish  
23 the appropriateness of clustering similar interventions into a single treatment node, for  
24 example: no treatment (e.g. waiting list control), passive treatment (e.g. manual therapy),  
25 pharmacological treatment (e.g. medications, supplements), and active treatment (e.g.  
26 exercise). Expert opinions will also be sought regarding the appropriateness of categorising  
27 combination interventions as additional treatment nodes (e.g. psychological interventions  
28 combined with exercise). Post-hoc classification of comparison interventions into distinct or  
29 single treatment nodes will also be made based on the available types of comparators. Any  
30 post-hoc alternative network geometrics formed using this approach will be clearly identified  
31 and justified in the final review.  
32  
33  
34  
35  
36  
37  
38  
39  
40

### 41 **Risk of bias in the included studies**

42 Two reviewers will independently assess risk of bias in the included studies using the  
43 Revised Cochrane risk-of-bias tool for randomized trials (RoB 2) in Covidence.[33, 34]  
44 Disagreements will be resolved through consensus or a third reviewer. Authors will be  
45 contacted for additional information where necessary. The RoB 2 assesses five domains: (1)  
46 bias arising from the randomisation process; (2) bias due to deviations from intended  
47 interventions; (3) bias due to missing outcome data; (4) bias in measurement of the outcome;  
48 (5) bias in selection of the reported result. Each domain will be graded as low risk of bias,  
49 some concerns, or high risk of bias, and the results will be summarised in a table. An overall  
50 risk of bias judgement (low risk of bias, some concerns, or high risk of bias) will be made  
51 based on the five domain-level judgements.  
52  
53  
54  
55  
56  
57  
58  
59  
60

## Data Analysis

Characteristics of the publications, study designs, study populations, interventions and comparators, and outcome measures will be summarised descriptively and presented in a table. Pair-wise meta-analysis will be performed in Stata (StataCorp. 2017. Stata Statistical Software: Version 13), and NMA will be performed in both Stata and R (V.3.6.1. R Core Team. 2019. R: A language and environment for statistical computing. R Foundation for Statistical Computing, Vienna, Austria).

## Summary measures

Dichotomous data will be reported as odds ratio (OR) and 95% confidence intervals (95% CI). Continuous data will be reported as mean differences (MD) and 95% CI for studies using the same rating scales. Standardised MD and 95% CI will be calculated for studies measuring comparable outcomes using different rating scales.

## Geometry of the network

The network diagram will be used to graphically depict the available evidence. Nodes will be used to represent the different interventions and comparators, and the width of the edges will be used to visually represent the proportional volume of studies comparing two connected nodes within the network.

## Pairwise meta-analysis

We will perform traditional pairwise meta-analyses of all direct comparisons using the DerSimonian and Laird inverse-variance random-effects method.[35] Heterogeneity will be quantified using Higgins  $I^2$  statistic, with  $I^2 > 50\%$  suggesting substantial heterogeneity.[35] Forest plots will be created to graphically depict individual and pooled effect sizes. Narrative analysis will be performed when statistical analysis is not feasible or sensible due to insufficient data provided or substantial heterogeneity.

## Assessment of transitivity assumption

Potential effect modifiers (age, gender, pain intensity, socioeconomic status, comorbidities, intervention dosage and frequency) will be assessed to confirm baseline similarity across treatment comparisons within the network. If intransitivity is suspected, meta-regression will be performed to explore the influence on the results.

### **Network meta-analysis**

A NMA will be performed using a frequentist approach to simultaneously compare direct and indirect evidence whilst preserving within-study randomisation.[36] Mean rank and relative treatment rankings with their 95% CI will be estimated for each intervention node according to the surface under the cumulative ranking curve (SUCRA) values (%).[37]

### **Assessment of inconsistency**

Local inconsistencies will be assessed using the Bucher method [38] by computation of inconsistency factors and 95% CI for each triangular and quadratic loop in the network. Global inconsistency of the entire network will be assessed using the design-by-treatment interaction model,[39] which is a goodness-of-fit test. If inconsistencies are found, a node-splitting method will be used to explore the origin of the inconsistency.[36]

### **Sensitivity and sub-group analysis**

To examine robustness of results, we will conduct a sensitivity analysis by excluding studies with high risk of bias. We will also perform the following sub-group analyses depending on available data:

(1) Delivery format of psychological intervention (e.g. face-to-face, telephone-administered, web-based, self-help booklets), the hypothesis is that face-to-face delivery format will result in greater improvements in disability and pain intensity.

(2) Individual versus group-based intervention delivery, the hypothesis is that group-based interventions will result in greater improvements in disability and pain intensity.

(3) Back pain only versus back pain and leg pain, the hypothesis is that the back pain only group will result in greater improvements in disability and pain intensity.

Meta-regression will be performed based on: (1) age; (2) percentage of males; (3) sample size; (4) baseline disability levels; (5) baseline pain levels.

### **Publication bias**

Publication bias will be evaluated by visual inspection of comparison-adjusted funnel plots for asymmetry. As described above, meta-regression using sample size and effect estimates will be performed to detected small study effect.[40]

### **Grading of evidence**

1  
2  
3 Quality of the evidence will be evaluated using the Confidence in Network Meta-Analysis  
4 (CINeMA) framework,[41] a Cochrane web application of the Grading of Recommendations  
5 Assessment, Development, and Evaluation ratings approach. The framework assesses six  
6 domains: within-study bias, across-studies bias, indirectness, imprecision, heterogeneity and  
7 incoherence.  
8  
9  
10  
11  
12

### 13 **Patient and public involvement**

14 Patients will not be involved.  
15  
16  
17

### 18 **CONTRIBUTIONS TO LITERATURE**

19 To date, there is no conclusive consensus regarding the most effective psychological  
20 approach for managing chronic non-specific LBP and therefore clinicians, policy makers, and  
21 patients have limited information on which approach to adopt. Previous studies have only  
22 investigated a small portion of available psychological interventions, most commonly  
23 cognitive behavioural therapy, mindfulness-based stress reduction and biofeedback, and  
24 comparisons have been limited by conventional pair-wise meta-analysis methodologies. This  
25 systematic review with NMA will synthesise direct and indirect evidence for a  
26 comprehensive variety of psychological interventions with respect to disability, pain  
27 intensity, health-related quality of life and fear avoidance for chronic non-specific LBP. The  
28 NMA will return relative treatment rankings to compare and rank the different psychological  
29 approaches and provide pragmatic support for clinical recommendations regarding their use  
30 in adults with chronic non-specific LBP.  
31  
32  
33  
34  
35  
36  
37  
38  
39  
40  
41  
42

### 43 **ETHICS AND DISSEMINATION**

44 Ethical review will not be required as the systematic review will only involve the use of  
45 previously published data for analysis. Our intention is to publish the completed research in a  
46 peer-review journal and present our findings at national and international conferences.  
47  
48  
49  
50

### 51 **CONFLICTS OF INTEREST**

52 There are no conflicts of interest in this study.  
53  
54  
55

### 56 **AUTHOR CONTRIBUTIONS**

57 All authors conceived the study. EKH drafted the manuscript. EKH, LC and JC participated  
58 in the search strategy development. PHF assisted in the protocol design and revision. JAH  
59  
60

1  
2  
3 and LC provided statistical expertise. CA provided expertise on psychological interventions.  
4  
5 All authors read and approved the final manuscript as submitted.  
6  
7

## 8 **FUNDING**

9  
10 This research received no specific grant from any funding agency in the public, commercial  
11 or not-for-profit sectors. PHF is funded by an NHMRC Fellowship and a Sydney University  
12 SOAR fellowship. MLF is funded by an NHMRC Fellowship and a Sydney University  
13 SOAR fellowship. MS is funded by a Sydney University SOAR fellowship. LC is funded by  
14 Northern Clinical School Higher Degree Research Support Scholarship. EKH is funded by an  
15 Australian Government Research Training Program Scholarship.  
16  
17  
18  
19  
20  
21  
22  
23  
24  
25  
26  
27  
28  
29  
30  
31  
32  
33  
34  
35  
36  
37  
38  
39  
40  
41  
42  
43  
44  
45  
46  
47  
48  
49  
50  
51  
52  
53  
54  
55  
56  
57  
58  
59  
60

1  
2  
3 **APPENDIX A**  
4

5 Database: Ovid MEDLINE

- 6 1. exp Back Pain/ or exp Low Back Pain/ or exp Backache/  
7  
8 2. (back pain or low back pain or lumbar pain or lumbago or dorsalgia or spinal pain  
9 or vertebral pain or backache or lumbar spine).ti,ab.  
10  
11 3. 1 or 2  
12  
13 4. exp Behavior Therapy/ or exp Cognitive Therapy/ or \*Conditioning, Operant/ or  
14 exp Reinforcement, Psychology/  
15  
16 5. (operant conditioning or reinforcement or psychological intervention or  
17 psychological therapy).ab,ti.  
18  
19 6. (cognitiv\* adj1 (treatment\* or therap\* or intervention\*)).ab,ti.  
20  
21 7. (behavio?r\* adj1 (treatment\* or therap\* or intervention\* or techniqu\* or modif\*  
22 or change\*)).ab,ti.  
23  
24 8. (graded exposure or desensiti\* or imagery or goal setting).ab,ti.  
25  
26 9. (acceptance and commitment therapy or CBT).ab,ti.  
27  
28 10. 4 or 5 or 6 or 7 or 8 or 9  
29  
30 11. exp Mindfulness/ or \*Mind-Body Therapies/ or exp Meditation/ or exp  
31 Relaxation/ or exp Relaxation Therapy/  
32  
33 12. (mindfulness based stress reduction\*).ab,ti.  
34  
35 13. (mindfulness or mind-body therapies or meditation or relaxation or relaxation  
36 therap\*).ab,ti.  
37  
38 14. (mbsr\* or mbct\*).ab,ti.  
39  
40 15. 11 or 12 or 13 or 14  
41  
42 16. (cognitive functional therapy or CFT).ab,ti.  
43  
44 17. exp Health Education/ or exp Health Promotion/ or exp Motivation/  
45  
46 18. (health education or health promotion or motivation).ab,ti.  
47  
48 19. ((health or wellness or life-style or behav\*) adj1 coach\*).ab,ti.  
49  
50 20. ((wellness or behav\*) adj1 intervention\*).ab,ti.  
51  
52 21. or/ 17 or 18 or 19 or 20  
53  
54 22. exp Biofeedback, Psychology/ or exp Feedback, Psychological/  
55  
56 23. (electromyograph\* or electromyogram\* or EMG\*).ab,ti.  
57  
58 24. (bio-feedback or feedback).ab,ti.  
59  
60 25. 22 or 23 or 24



- 1
- 2
- 3 26. (pain neuroscience education or pain education or neuroscience education or pain
- 4 physiology education or neuro-physiology education or therapeutic
- 5 education).ab,ti.
- 6
- 7
- 8 27. exp Counseling/
- 9
- 10 28. (counseling or supportive psychotherap\*).ab,ti.
- 11
- 12 29. 27 or 28
- 13 30. 10 or 15 or 16 or 21 or 25 or 26 or 29
- 14
- 15 31. 3 and 30
- 16
- 17 32. exp Randomized controlled trial/ or \*Clinical Trial/ or \*Random allocation/ or
- 18 exp Controlled clinical trial/
- 19
- 20 33. randomized controlled trial.pt.
- 21
- 22 34. (random\* adj3 trial).ab,ti.
- 23
- 24 35. (clinical trial or random allocation or controlled clinical trial).ab,ti.
- 25
- 26 36. 32 or 33 or 34 or 35
- 27
- 28 37. 31 and 36
- 29
- 30 38. limit 37 to humans
- 31
- 32
- 33
- 34
- 35
- 36
- 37
- 38
- 39
- 40
- 41
- 42
- 43
- 44
- 45
- 46
- 47
- 48
- 49
- 50
- 51
- 52
- 53
- 54
- 55
- 56
- 57
- 58
- 59
- 60

## REFERENCES

1. Sebbag E, Felten R, Sagez F, et al. The world-wide burden of musculoskeletal diseases: a systematic analysis of the World Health Organization Burden of Diseases Database. *Annals of the rheumatic diseases*. 2019;**78**(6):844-848.
2. James SL, Abate D, Abate KH, et al. Global, regional, and national incidence, prevalence, and years lived with disability for 354 diseases and injuries for 195 countries and territories, 1990–2017: a systematic analysis for the Global Burden of Disease Study 2017. *The Lancet*. 2018;**392**(10159):1789-1858.
3. Dagenais S, Caro J, Haldeman S. A systematic review of low back pain cost of illness studies in the United States and internationally. *The Spine Journal*. 2008;**8**(1):8-20.
4. Hartvigsen J, Hancock MJ, Kongsted A, et al. What low back pain is and why we need to pay attention. *The Lancet*. 2018;**391**(10137):2356-2367.
5. O’Sullivan PB, Caneiro J, O’Keeffe M, et al. Cognitive functional therapy: an integrated behavioral approach for the targeted management of disabling low back pain. *Physical therapy*. 2018;**98**(5):408-423.
6. O’Keeffe M, George SZ, O’Sullivan PB, et al. *Psychosocial factors in low back pain: letting go of our misconceptions can help management*. 2018, BMJ Publishing Group Ltd and British Association of Sport and Exercise Medicine.
7. Ikemoto T, Miki K, Matsubara T, et al. Psychological Treatment Strategy for Chronic Low Back Pain. *Spine Surgery and Related Research*. 2018.
8. Wertli MM, Eugster R, Held U, et al. Catastrophizing—a prognostic factor for outcome in patients with low back pain: a systematic review. *The Spine Journal*. 2014;**14**(11):2639-2657.
9. Pinheiro MB, Ferreira ML, Refshauge K, et al. Symptoms of depression as a prognostic factor for low back pain: a systematic review. *The Spine Journal*. 2016;**16**(1):105-116.
10. Buchbinder R, van Tulder M, Öberg B, et al. Low back pain: a call for action. *The Lancet*. 2018;**391**(10137):2384-2388.
11. van Tulder MW, Ostelo R, Vlaeyen JW, et al. Behavioral treatment for chronic low back pain: a systematic review within the framework of the Cochrane Back Review Group. *Spine*. 2000;**25**(20):2688-2699.
12. Hoffman BM, Papas RK, Chatkoff DK, et al. Meta-analysis of psychological interventions for chronic low back pain. *Health psychology*. 2007;**26**(1):1.
13. Guzmán J, Esmail R, Karjalainen K, et al. Multidisciplinary rehabilitation for chronic low back pain: systematic review. *Bmj*. 2001;**322**(7301):1511-1516.

14. Mounce K. Back pain. *Rheumatology*. 2002;**41**(1):1-5.
15. de Campos TF. Low back pain and sciatica in over 16s: assessment and management NICE Guideline [NG59]. *J Physiother*. 2017;**63**(2):120.
16. Qaseem A, Wilt TJ, McLean RM, et al. Noninvasive treatments for acute, subacute, and chronic low back pain: a clinical practice guideline from the American College of Physicians. *Annals of internal medicine*. 2017;**166**(7):514-530.
17. Chou R, Deyo R, Friedly J, et al. Nonpharmacologic Therapies for Low Back Pain: A Systematic Review for an American College of Physicians Clinical Practice Guideline. *Ann Intern Med*. 2017.
18. Van Wambeke P, Desomer A, Aillet L, et al. Low back pain and radicular pain: assessment and management. *KCE Report*. 2017;**287**.
19. Toward Optimized Practice (TOP) and Low Back Pain Working Group. *Evidence-informed primary care management of low back pain: Clinical practice guideline (3rd Edition)*. 2015, Toward Optimized Practice (TOP): Edmonton, AB.
20. Foster NE, Anema JR, Cherkin D, et al. Prevention and treatment of low back pain: evidence, challenges, and promising directions. *The Lancet*. 2018;**391**(10137):2368-2383.
21. Morley S, Eccleston C, Williams A. Systematic review and meta-analysis of randomized controlled trials of cognitive behaviour therapy and behaviour therapy for chronic pain in adults, excluding headache. *Pain*. 1999;**80**(1-2):1-13.
22. Nielson WR and Weir R. Biopsychosocial approaches to the treatment of chronic pain. *The Clinical journal of pain*. 2001;**17**(4):S114-S127.
23. Henschke N, Ostelo RW, van Tulder MW, et al. Behavioural treatment for chronic low-back pain. *Cochrane database of systematic reviews*. 2010(7).
24. Synnott A, O’Keeffe M, Bunzli S, et al. Physiotherapists may stigmatise or feel unprepared to treat people with low back pain and psychosocial factors that influence recovery: a systematic review. *Journal of physiotherapy*. 2015;**61**(2):68-76.
25. Alexanders J, Anderson A, Henderson S. Musculoskeletal physiotherapists’ use of psychological interventions: a systematic review of therapists’ perceptions and practice. *Physiotherapy*. 2015;**101**(2):95-102.
26. Dias S, Welton NJ, Sutton AJ, et al. Evidence synthesis for decision making 1: introduction. *Medical decision making*. 2013;**33**(5):597-606.
27. Moher D, Shamseer L, Clarke M, et al. Preferred reporting items for systematic review and meta-analysis protocols (PRISMA-P) 2015 statement. *Systematic reviews*. 2015;**4**(1):1.

- 1
- 2
- 3
- 4 28. Savigny P, Kuntze S, Watson P, et al. Low back pain: early management of persistent
- 5 non-specific low back pain. *London: National Collaborating Centre for Primary Care and*
- 6 *Royal College of General Practitioners*. 2009;**14**(NICE Clinical Guidelines, No. 88).
- 7
- 8 29. Longo UG, Loppini M, Denaro L, et al. Rating scales for low back pain. *British medical*
- 9 *bulletin*. 2010;**94**(1):81-144.
- 10
- 11 30. Chiarotto A, Boers M, Deyo RA, et al. Core outcome measurement instruments for
- 12 clinical trials in nonspecific low back pain. *Pain*. 2018;**159**(3):481.
- 13
- 14 31. Clement RC, Welander A, Stowell C, et al. A proposed set of metrics for standardized
- 15 outcome reporting in the management of low back pain. *Acta orthopaedica*. 2015;**86**(5):523-
- 16 533.
- 17
- 18 32. George SZ, Valencia C, Beneciuk JM. A psychometric investigation of fear-avoidance
- 19 model measures in patients with chronic low back pain. *journal of orthopaedic & sports*
- 20 *physical therapy*. 2010;**40**(4):197-205.
- 21
- 22 33. Covidence. *Covidence systematic review software*. Veritas Health Innovation. Melbourne,
- 23 Australia; Available from: <https://www.covidence.org/>.
- 24
- 25 34. Sterne JA, Savović J, Page MJ, et al. RoB 2: a revised tool for assessing risk of bias in
- 26 randomised trials. *BMJ*. 2019;**366**:l4898.
- 27
- 28 35. Deeks JJ HJ, Altman DG (editors). *Chapter 10: Analysing data and undertaking*
- 29 *meta-analyses. Draft version (29 January 2019) for inclusion in: Higgins JPT, Thomas J,*
- 30 *Chandler J, Cumpston M, Li T, Page MJ, Welch VA (editors). Cochrane Handbook for*
- 31 *Systematic Reviews of Interventions*. 2019, London: Cochrane
- 32
- 33 36. White IR. Network meta-analysis. *The Stata Journal*. 2015;**15**(4):951-985.
- 34
- 35 37. Salanti G, Ades A, Ioannidis JP. Graphical methods and numerical summaries for
- 36 presenting results from multiple-treatment meta-analysis: an overview and tutorial. *Journal of*
- 37 *clinical epidemiology*. 2011;**64**(2):163-171.
- 38
- 39 38. Bucher HC, Guyatt GH, Griffith LE, et al. The results of direct and indirect treatment
- 40 comparisons in meta-analysis of randomized controlled trials. *Journal of clinical*
- 41 *epidemiology*. 1997;**50**(6):683-691.
- 42
- 43 39. Higgins J, Jackson D, Barrett J, et al. Consistency and inconsistency in network
- 44 meta-analysis: concepts and models for multi-arm studies. *Research synthesis methods*.
- 45 2012;**3**(2):98-110.
- 46
- 47 40. Chaimani A and Salanti G. Using network meta-analysis to evaluate the existence of
- 48 small-study effects in a network of interventions. *Research Synthesis Methods*.
- 49 2012;**3**(2):161-176.
- 50
- 51
- 52
- 53
- 54
- 55
- 56
- 57
- 58
- 59
- 60

1  
2  
3 41. Institute of Social and Preventive Medicine. *CINeMA: Confidence in Network Meta-*  
4 *Analysis* 2017; Available from: [cinema.ispm.unibe.ch](http://cinema.ispm.unibe.ch).  
5  
6  
7  
8  
9  
10  
11  
12  
13  
14  
15  
16  
17  
18  
19  
20  
21  
22  
23  
24  
25  
26  
27  
28  
29  
30  
31  
32  
33  
34  
35  
36  
37  
38  
39  
40  
41  
42  
43  
44  
45  
46  
47  
48  
49  
50  
51  
52  
53  
54  
55  
56  
57  
58  
59  
60

For peer review only

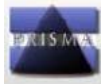

# PRISMA 2009 Checklist

| Section/topic                      | #  | Checklist item                                                                                                                                                                                                                                                                                              | Reported on page # |
|------------------------------------|----|-------------------------------------------------------------------------------------------------------------------------------------------------------------------------------------------------------------------------------------------------------------------------------------------------------------|--------------------|
| <b>TITLE</b>                       |    |                                                                                                                                                                                                                                                                                                             |                    |
| Title                              | 1  | Identify the report as a systematic review, meta-analysis, or both.                                                                                                                                                                                                                                         | 1,4                |
| <b>ABSTRACT</b>                    |    |                                                                                                                                                                                                                                                                                                             |                    |
| Structured summary                 | 2  | Provide a structured summary including, as applicable: background; objectives; data sources; study eligibility criteria, participants, and interventions; study appraisal and synthesis methods; results; limitations; conclusions and implications of key findings; systematic review registration number. | 2                  |
| <b>INTRODUCTION</b>                |    |                                                                                                                                                                                                                                                                                                             |                    |
| Rationale                          | 3  | Describe the rationale for the review in the context of what is already known.                                                                                                                                                                                                                              | 4                  |
| Objectives                         | 4  | Provide an explicit statement of questions being addressed with reference to participants, interventions, comparisons, outcomes, and study design (PICOS).                                                                                                                                                  | 5                  |
| <b>METHODS</b>                     |    |                                                                                                                                                                                                                                                                                                             |                    |
| Protocol and registration          | 5  | Indicate if a review protocol exists, if and where it can be accessed (e.g., Web address), and, if available, provide registration information including registration number.                                                                                                                               | 5                  |
| Eligibility criteria               | 6  | Specify study characteristics (e.g., PICOS, length of follow-up) and report characteristics (e.g., years considered, language, publication status) used as criteria for eligibility, giving rationale.                                                                                                      | 5,7                |
| Information sources                | 7  | Describe all information sources (e.g., databases with dates of coverage, contact with study authors to identify additional studies) in the search and date last searched.                                                                                                                                  | 7                  |
| Search                             | 8  | Present full electronic search strategy for at least one database, including any limits used, such that it could be repeated.                                                                                                                                                                               | 13-14              |
| Study selection                    | 9  | State the process for selecting studies (i.e., screening, eligibility, included in systematic review, and, if applicable, included in the meta-analysis).                                                                                                                                                   | 7                  |
| Data collection process            | 10 | Describe method of data extraction from reports (e.g., piloted forms, independently, in duplicate) and any processes for obtaining and confirming data from investigators.                                                                                                                                  | 7-8                |
| Data items                         | 11 | List and define all variables for which data were sought (e.g., PICOS, funding sources) and any assumptions and simplifications made.                                                                                                                                                                       | 7-8                |
| Risk of bias in individual studies | 12 | Describe methods used for assessing risk of bias of individual studies (including specification of whether this was done at the study or outcome level), and how this information is to be used in any data synthesis.                                                                                      | 8                  |
| Summary measures                   | 13 | State the principal summary measures (e.g., risk ratio, difference in means).                                                                                                                                                                                                                               | 9                  |
| Synthesis of results               | 14 | Describe the methods of handling data and combining results of studies, if done, including measures of consistency (e.g., I <sup>2</sup> ) for each meta-analysis.                                                                                                                                          | 9,10               |

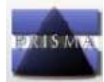

# PRISMA 2009 Checklist

Page 1 of 2

| Section/topic                 | #  | Checklist item                                                                                                                                                                                           | Reported on page #   |
|-------------------------------|----|----------------------------------------------------------------------------------------------------------------------------------------------------------------------------------------------------------|----------------------|
| Risk of bias across studies   | 15 | Specify any assessment of risk of bias that may affect the cumulative evidence (e.g., publication bias, selective reporting within studies).                                                             | 10,11                |
| Additional analyses           | 16 | Describe methods of additional analyses (e.g., sensitivity or subgroup analyses, meta-regression), if done, indicating which were pre-specified.                                                         | 10                   |
| <b>RESULTS</b>                |    |                                                                                                                                                                                                          |                      |
| Study selection               | 17 | Give numbers of studies screened, assessed for eligibility, and included in the review, with reasons for exclusions at each stage, ideally with a flow diagram.                                          | N/A – protocol paper |
| Study characteristics         | 18 | For each study, present characteristics for which data were extracted (e.g., study size, PICOS, follow-up period) and provide the citations.                                                             | N/A – protocol paper |
| Risk of bias within studies   | 19 | Present data on risk of bias of each study and, if available, any outcome level assessment (see item 12).                                                                                                | N/A – protocol paper |
| Results of individual studies | 20 | For all outcomes considered (benefits or harms), present, for each study: (a) simple summary data for each intervention group (b) effect estimates and confidence intervals, ideally with a forest plot. | N/A – protocol paper |
| Synthesis of results          | 21 | Present results of each meta-analysis done, including confidence intervals and measures of consistency.                                                                                                  | N/A – protocol paper |
| Risk of bias across studies   | 22 | Present results of any assessment of risk of bias across studies (see Item 15).                                                                                                                          | N/A – protocol paper |
| Additional analysis           | 23 | Give results of additional analyses, if done (e.g., sensitivity or subgroup analyses, meta-regression [see Item 16]).                                                                                    | N/A – protocol paper |
| <b>DISCUSSION</b>             |    |                                                                                                                                                                                                          |                      |
| Summary of evidence           | 24 | Summarize the main findings including the strength of evidence for each main outcome; consider their relevance to key groups (e.g., healthcare providers, users, and policy makers).                     | N/A – protocol paper |
| Limitations                   | 25 | Discuss limitations at study and outcome level (e.g., risk of bias), and at review-level (e.g., incomplete retrieval of identified research, reporting bias).                                            | N/A – protocol paper |
| Conclusions                   | 26 | Provide a general interpretation of the results in the context of other evidence, and implications for future research.                                                                                  | N/A – protocol paper |

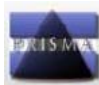

# PRISMA 2009 Checklist

1  
2  
3  
4  
5  
6  
7  
8  
9  
10  
11  
12  
13  
14  
15  
16  
17  
18  
19  
20  
21  
22  
23  
24  
25  
26  
27  
28  
29  
30  
31  
32  
33  
34  
35  
36  
37  
38  
39  
40  
41  
42  
43  
44  
45  
46  
47

| FUNDING |    |                                                                                                                                            |    |
|---------|----|--------------------------------------------------------------------------------------------------------------------------------------------|----|
| Funding | 27 | Describe sources of funding for the systematic review and other support (e.g., supply of data); role of funders for the systematic review. | 12 |

From: Moher D, Liberati A, Tetzlaff J, Altman DG, The PRISMA Group (2009). Preferred Reporting Items for Systematic Reviews and Meta-Analyses: The PRISMA Statement. PLoS Med 6(6): e1000097. doi:10.1371/journal.pmed1000097

For more information, visit: [www.prisma-statement.org](http://www.prisma-statement.org).

Page 2 of 2

For peer review only



# BMJ Open

## Psychological interventions for chronic non-specific low back pain: protocol of a systematic review with network meta-analysis

|                                 |                                                                                                                                                                                                                                                                                                                                                                                                                                                                                                                                                                                                                                                                                                                             |
|---------------------------------|-----------------------------------------------------------------------------------------------------------------------------------------------------------------------------------------------------------------------------------------------------------------------------------------------------------------------------------------------------------------------------------------------------------------------------------------------------------------------------------------------------------------------------------------------------------------------------------------------------------------------------------------------------------------------------------------------------------------------------|
| Journal:                        | <i>BMJ Open</i>                                                                                                                                                                                                                                                                                                                                                                                                                                                                                                                                                                                                                                                                                                             |
| Manuscript ID                   | bmjopen-2019-034996.R1                                                                                                                                                                                                                                                                                                                                                                                                                                                                                                                                                                                                                                                                                                      |
| Article Type:                   | Protocol                                                                                                                                                                                                                                                                                                                                                                                                                                                                                                                                                                                                                                                                                                                    |
| Date Submitted by the Author:   | 14-Feb-2020                                                                                                                                                                                                                                                                                                                                                                                                                                                                                                                                                                                                                                                                                                                 |
| Complete List of Authors:       | Ho, Emma; The University of Sydney, Faculty of Medicine and Health<br>Ferreira, Manuela; University of Sydney Institute of Bone and Joint Research,<br>Chen, Lingxiao; The University of Sydney Institute of Bone and Joint Research,<br>Simic, Milena; The University of Sydney, Faculty of Medicine and Health<br>Ashton-James, Claire; The University of Sydney, Pain Management Research Institute, Faculty of Medicine and Health<br>Comachio, Josielli ; University of Sao Paulo, Department of Speech, Physical Therapy and Occupational Therapy, School of Medicine<br>Hayden, Jill; Dalhousie University, Community Health & Epidemiology<br>Ferreira, Paulo; University of Sydney, Faculty of Medicine and Health |
| <b>Primary Subject Heading</b>: | Public health                                                                                                                                                                                                                                                                                                                                                                                                                                                                                                                                                                                                                                                                                                               |
| Secondary Subject Heading:      | Mental health                                                                                                                                                                                                                                                                                                                                                                                                                                                                                                                                                                                                                                                                                                               |
| Keywords:                       | Back pain < ORTHOPAEDIC & TRAUMA SURGERY, Musculoskeletal disorders < ORTHOPAEDIC & TRAUMA SURGERY, PSYCHIATRY                                                                                                                                                                                                                                                                                                                                                                                                                                                                                                                                                                                                              |
|                                 |                                                                                                                                                                                                                                                                                                                                                                                                                                                                                                                                                                                                                                                                                                                             |

SCHOLARONE™  
Manuscripts



I, the Submitting Author has the right to grant and does grant on behalf of all authors of the Work (as defined in the below author licence), an exclusive licence and/or a non-exclusive licence for contributions from authors who are: i) UK Crown employees; ii) where BMJ has agreed a CC-BY licence shall apply, and/or iii) in accordance with the terms applicable for US Federal Government officers or employees acting as part of their official duties; on a worldwide, perpetual, irrevocable, royalty-free basis to BMJ Publishing Group Ltd ("BMJ") its licensees and where the relevant Journal is co-owned by BMJ to the co-owners of the Journal, to publish the Work in this journal and any other BMJ products and to exploit all rights, as set out in our [licence](#).

The Submitting Author accepts and understands that any supply made under these terms is made by BMJ to the Submitting Author unless you are acting as an employee on behalf of your employer or a postgraduate student of an affiliated institution which is paying any applicable article publishing charge ("APC") for Open Access articles. Where the Submitting Author wishes to make the Work available on an Open Access basis (and intends to pay the relevant APC), the terms of reuse of such Open Access shall be governed by a Creative Commons licence – details of these licences and which [Creative Commons](#) licence will apply to this Work are set out in our licence referred to above.

Other than as permitted in any relevant BMJ Author's Self Archiving Policies, I confirm this Work has not been accepted for publication elsewhere, is not being considered for publication elsewhere and does not duplicate material already published. I confirm all authors consent to publication of this Work and authorise the granting of this licence.

1  
2  
3 **Psychological interventions for chronic non-specific low back pain: protocol of a**  
4 **systematic review with network meta-analysis.**  
5  
6  
7  
8

9 Emma Kwan-Yee Ho<sup>a</sup>, Manuela Loureiro Ferreira<sup>b</sup>, Lingxiao Chen<sup>b</sup>, Milena Simic<sup>a</sup>, Claire  
10 Ashton-James<sup>c</sup>, Josielli Comachio<sup>d</sup>, Jill Alison Hayden<sup>e</sup>, Paulo Henrique Ferreira<sup>a</sup>  
11

12 <sup>a</sup>The University of Sydney, Faculty of Medicine and Health, Sydney, NSW, Australia.  
13

14 <sup>b</sup>The University of Sydney, Institute of Bone and Joint Research, Northern Clinical School,  
15 Faculty of Medicine and Health, Sydney, NSW, Australia.  
16

17 <sup>c</sup>The University of Sydney, Pain Management Research Institute, Faculty of Medicine and  
18 Health, Sydney, NSW, Australia.  
19

20 <sup>d</sup>Department of Speech, Physical Therapy and Occupational Therapy, School of Medicine,  
21 University of Sao Paulo, Sao Paulo, Brazil.  
22

23 <sup>e</sup>Department of Community Health & Epidemiology, Dalhousie University, Halifax, Nova  
24 Scotia, Canada.  
25  
26  
27  
28

29 **Address for Correspondence:**

30 Ms. Emma Kwan-Yee Ho, Faculty of Medicine and Health  
31 University of Sydney, PO Box 170 Lidcombe 1825 AUSTRALIA  
32  
33 Tel: +61 434 596 855  
34  
35 E-mail: emma.ho@sydney.edu.au  
36  
37  
38  
39

40 **Word count:** 5028  
41  
42  
43

44 **Funding Sources:** This research received no specific grant from any funding agency in the  
45 public, commercial or not-for-profit sectors. PHF is funded by an NHMRC Fellowship and a  
46 Sydney University SOAR fellowship. MLF is funded by an NHMRC Fellowship and a  
47 Sydney University SOAR fellowship. MS is funded by a Sydney University SOAR  
48 fellowship. LC is funded by Northern Clinical School Higher Degree Research Support  
49 Scholarship. EKH is funded by an Australian Government Research Training Program  
50 Scholarship.  
51  
52  
53  
54  
55  
56  
57

58 **Conflict of Interest:**

59 None declared.  
60

## ABSTRACT

**Introduction:** Psychological factors such as fear avoidance beliefs, depression, anxiety, catastrophic thinking, and familial and social stress, have been associated with high disability levels in people with chronic low back pain (LBP). Guidelines endorse the integration of psychological interventions in the management of chronic LBP. However, uncertainty surrounds the comparative effectiveness of different psychological approaches. Network meta-analysis (NMA) allows comparison and ranking of numerous competing interventions for a given outcome of interest. Therefore, we will perform a systematic review with a NMA to determine which type of psychological intervention is most effective for adults with chronic non-specific LBP.

**Methods and analysis:** We will search electronic databases (MEDLINE, EMBASE, PsycINFO, Cochrane Central Register of Controlled Trials, Web of Science, SCOPUS and CINAHL) from inception until 22 August 2019 for randomised controlled trials comparing psychological interventions to any comparison interventions in adults with chronic non-specific LBP. There will be no restriction on language. The primary outcomes will include physical function and pain intensity, and secondary outcomes will include health-related quality of life, fear avoidance and intervention compliance. Risk of bias will be assessed using the Revised Cochrane risk-of-bias tool for randomized trials (RoB 2) tool and confidence in the evidence will be assessed using Cochrane's Confidence in NMA (CINeMA) framework. We will conduct a random-effects NMA using a frequentist approach to estimate relative treatment rankings according to the mean rank and surface under the cumulative ranking curve values. All analyses will be performed in Stata.

**Ethics and dissemination:** No ethical approval is required. The research will be published in a peer-reviewed journal.

**PROSPERO registration number:** CRD42019138074

**Key Words:** back pain, low back pain, musculoskeletal disorders, chronic, psychological, psychiatry, network meta-analysis, systematic review.

### Strengths and limitations of this study

- This is the first systematic review using an NMA design to simultaneously compare different types of psychological interventions for improving physical function, pain intensity, health-related quality of life, fear avoidance and intervention compliance in people with chronic non-specific LBP.
- The main strength is the NMA design will allow for the comprehensive comparison and ranking of multiple psychological interventions simultaneously, which was not possible with previous systematic reviews that only conducted pair-wise meta-analyses.
- An additional strength is that in comparison to previous pair-wise systematic reviews, the NMA design will allow for the inclusion and synthesis of a larger number of studies investigating a wider range of psychological interventions.
- The main limitation is that we anticipate numerous studies involving different combinations of psychological approaches (e.g. cognitive behavioural therapy plus pain education, counselling-based therapies plus pain education), but small number of eligible studies per combination, hence we will lump combination interventions into one treatment node for practical reasons.

1  
2  
3  
4  
5  
6  
7  
8  
9  
10  
11  
12  
13  
14  
15  
16  
17  
18  
19  
20  
21  
22  
23  
24  
25  
26  
27  
28  
29  
30  
31  
32  
33  
34  
35  
36  
37  
38  
39  
40  
41  
42  
43  
44  
45  
46  
47  
48  
49  
50  
51  
52  
53  
54  
55  
56  
57  
58  
59  
60

## **Psychological interventions for chronic non-specific low back pain: protocol of a systematic review with network meta-analysis.**

Low back pain (LBP) is one of largest contributors to disability worldwide [1, 2] and is associated with substantial health and economic burden relating to increased health-care utilisation costs, work absenteeism and productivity loss.[3] The challenge associated with treating chronic non-specific LBP lies in the complex multifactorial interaction between genetic, biophysical, psychosocial, health and lifestyle factors which are largely individualistic.[4, 5] Particularly, psychological factors such as fear avoidance beliefs, depression, anxiety, catastrophic thinking, and familial and social stress [4] are often poorly identified and inadequately addressed,[6] and have been shown to alter pain processing pathways, perceptions, and coping responses.[5, 7] The influence of these factors in chronic non-specific LBP have been found to increase the risk of disability,[8, 9] which commonly manifests as reduced functional capacity, avoidance of usual activities including work, and impaired societal and recreational participation.[5, 10]

Psychological interventions in chronic pain conditions aim to reduce pain-related distress and disability by changing negative beliefs, behaviours and attitudes through a combination of principles and strategies informed by psychological theories. Psychological interventions commonly focus on targeting the specific environmental contingencies and maladaptive cognitive and emotional processes underpinning pain in order to promote self-efficacy and increased function.[11, 12] In clinical trials of psychological interventions for chronic LBP, psychological interventions are delivered either in isolation [12, 13] or as part of an integrated treatment program that may involve non-psychological co-interventions such as exercise, passive treatment or physiotherapy.[14-16] For the purposes of this review, we have defined five main categories of psychological interventions relevant to LBP: behavioural therapies, cognitive behavioural therapies, mindfulness-based therapies, counselling-based therapies, and pain education-focused therapies. These categories reflect the three “waves” of how psychological interventions have evolved over time.[17] Behavioural therapies are typically considered “first wave” approaches,[17] and include interventions focused on altering maladaptive behaviours, and dysfunctional sensations or movements.[18] Cognitive behavioural therapies are considered “second wave” approaches,[17] and include interventions that aim to modify harmful cognitions (e.g. thoughts, beliefs) which may proliferate pain and disability.[18] Mindfulness-based therapies, counselling-based therapies

and pain education-focused therapies represent different types of ‘third wave’ approaches.[17] Unlike behavioural and cognitive behavioural therapies which focus on targeting psychological and emotional symptoms, “third wave” therapies adopt a more holistic approach to promoting health and wellness.[17] Key characteristics and examples of the psychological intervention categories that will be included in our review are summarised below in Table 1.

**Table 1. Categories of Psychological Interventions for Low Back Pain**

|             | <b>Category</b>                  | <b>Characteristics</b>                                                                                                                                                                                                                                                                                        | <b>Examples</b>                                                                       |
|-------------|----------------------------------|---------------------------------------------------------------------------------------------------------------------------------------------------------------------------------------------------------------------------------------------------------------------------------------------------------------|---------------------------------------------------------------------------------------|
| First wave  | Behavioural therapies            | Behavioural therapies focus on the removal of positive reinforcement of pain behaviours and teach patients to overcome stressful situations through relaxation skills.[17]                                                                                                                                    | Biofeedback [17, 18]                                                                  |
| Second wave | Cognitive behavioural therapies  | Cognitive behavioural therapies aim to restructure negative cognitions (e.g. thoughts, beliefs) and behaviours and promote emotion regulation and problem-solving capacity.[17]                                                                                                                               | Graded activity [17]<br>Graded exposure [17]                                          |
| Third wave  | Mindfulness-based therapies      | Mindfulness-based therapies focus on promoting self-awareness, attention control, and pain acceptance.[13, 19]                                                                                                                                                                                                | Mindfulness-based stress reduction [17, 19]<br>Acceptance and commitment therapy [17] |
|             | Counselling-based therapies      | Counselling-based therapies focus on using supportive communication and active listening techniques to build interpersonal clinician-patient relationships.                                                                                                                                                   | Health coaching [20, 21]<br>Motivational interviewing [20, 21]                        |
|             | Pain education-focused therapies | Pain education-focused therapies target a patient’s understanding and knowledge of pain to reduce fear associated with LBP. Pain education interventions move away from the traditional biomechanical explanation of pathology and pain, and instead focus on the reconceptualisation of the pain experience. | Pain neuroscience education [22]                                                      |

1  
2  
3 Some pain education interventions specifically  
4 aim to desensitise the nervous system.  
5  
6

---

7  
8 Previous systematic reviews have shown promising evidence that psychological interventions  
9 can improve overall functioning, pain experience, depression, cognitive appraisal, health-  
10 related quality of life and decreased health care utilisation in people with chronic LBP.[11,  
11 12, 15] Psychological interventions can also reduce fear avoidance beliefs and behaviours  
12 (e.g. kinesiophobia),[23] which are associated with increased disability and pain in people  
13 with chronic LBP.[24, 25] Based on the evidence and LBP research experts, international  
14 clinical guidelines consistently endorse the integration of psychological interventions with  
15 exercise in the management of chronic LBP.[26-31]  
16  
17  
18  
19  
20  
21  
22

23  
24 However, LBP guideline recommendations remain vague regarding the specific types of  
25 psychological approaches that clinicians should consider incorporating into treatment.[26-31]  
26 This may be due to the fact that previous systematic reviews, which have informed these  
27 guidelines, have mainly focused on a small selection of available approaches – namely  
28 cognitive behavioural therapy and behavioural approaches such as biofeedback.[11, 12, 15,  
29 18, 32, 33] Emerging psychological interventions such as cognitive functional therapy (a  
30 combination of psychological approaches involving cognitive behavioural strategies, pain  
31 education and exercise)[5] and acceptance and commitment therapy have been neglected  
32 from these reviews, despite recent evidence for their effectiveness in reducing LBP-related  
33 disability.[34, 35] Importantly, previous reviews have only conducted multiple independent  
34 pairwise meta-analyses, and to our knowledge, no attempts have been made to synthesise the  
35 separate results. Ultimately, the comparative effectiveness of the wider collection of  
36 psychological interventions available for managing chronic LBP is unknown and clinical  
37 guidelines remain unclear. This represents an important gap in the evidence. Subsequently,  
38 there is an increased reliance on a clinician's expertise to select the most appropriate  
39 psychological approach for people with chronic LBP. Given that clinicians such as  
40 physiotherapists report a perceived lack of training and confidence in addressing  
41 psychological factors,[36-38] and tend to be biased towards a biomedical approach despite  
42 increasing efforts to adopt a biopsychosocial, person-centered approach,[38, 39] the gap in  
43 evidence must be addressed. A network meta-analysis (NMA) design will allow us to  
44 determine the comparative effectiveness of psychological interventions for managing chronic  
45 LBP, whilst addressing the limitations identified from previous reviews.  
46  
47  
48  
49  
50  
51  
52  
53  
54  
55  
56  
57  
58  
59  
60



1  
2  
3  
4  
5 A NMA is an extension of a traditional pairwise meta-analysis and involves the synthesis of  
6 direct and indirect evidence to simultaneously compare numerous competing interventions  
7 within a single, coherent treatment network.[40] Direct evidence refers to data obtained from  
8 studies directly comparing competing interventions in head-to-head trials. Direct evidence  
9 can be used to indirectly estimate the effect of interventions that have not been previously  
10 compared in head-to-head trials but have been compared to a common comparator (indirect  
11 evidence). Integrating direct and indirect evidence increases the precision of treatment effect  
12 estimates, provided that the assumptions of transitivity (balanced distribution of potential  
13 effect modifiers across all competing interventions within a network) and consistency  
14 (statistical agreement between all competing interventions within a network) are satisfied.  
15 Treatment effect estimates are used to generate relative treatment rankings to rank all the  
16 competing interventions for a particular outcome measure. As such, the current research aims  
17 to perform a NMA to investigate the comparative effectiveness of psychological  
18 interventions for chronic LBP and determine which specific type is most effective for  
19 improving physical function, pain intensity, health-related quality of life, fear avoidance and  
20 intervention compliance in chronic non-specific LBP.  
21  
22  
23  
24  
25  
26  
27  
28  
29  
30  
31  
32  
33

## 34 **METHODS AND ANALYSIS**

### 35 **Study design**

36 This protocol was written in accordance with the Preferred Reporting Items for Systematic  
37 Reviews and Meta-Analyses (PRISMA) statement for systematic reviews[41] and the  
38 PRISMA extension for developing review protocols (PRISMA-P)[42] and for NMA  
39 (PRISMA-NMA).[43] The systematic review protocol has been registered with the  
40 International Prospective Register of Systematic Reviews (PROSPERO): CRD42019138074.  
41  
42  
43  
44  
45  
46  
47

### 48 **Eligibility criteria**

#### 49 **Types of studies**

50 We will include published parallel and cluster randomised controlled trials (RCT). We will  
51 also include the first phase of cross-over RCTs. There will be no restriction on length of  
52 follow-up. Observational studies, non-randomised trials, short reports, research letters,  
53 conferences abstracts, or studies that have not been published as full-length articles in peer-  
54 reviewed scientific journals will be excluded. In accordance with the Cochrane  
55 handbook,[44] we will only include data from cluster RCTs which account for the cluster  
56  
57  
58  
59  
60

1  
2  
3 design (e.g. data analysed at the level of allocation). If cluster-level data is not reported for a  
4 given cluster RCT study, we will attempt to use the approximate approaches described in the  
5 Cochrane handbook to adjust the results,[44] otherwise the study will be excluded.  
6  
7  
8  
9

### 10 Types of participants

11 Eligible studies will include adults experiencing chronic non-specific LBP, with or without  
12 the presence of leg pain. Chronic non-specific LBP will be defined according to NICE UK  
13 guidelines as pain in the back between the bottom of the rib cage and buttocks crease with no  
14 known pathoanatomical cause, for greater than 12 weeks in duration.[26, 45] Studies  
15 including participants with serious pathologies (e.g. spinal stenosis, malignancy, trauma,  
16 vertebral fracture, infection, inflammatory disorders) will be excluded. We will include  
17 studies involving a combination of acute, sub-acute or chronic LBP populations, provided  
18 that >50% of participants within a given study have chronic LBP. We will also include  
19 studies of chronic LBP participants combined with other chronic pain conditions, provided  
20 that >50% of participants have a single diagnosis of chronic LBP. If it is unclear, study  
21 eligibility will be determined by consensus amongst reviewers.  
22  
23  
24  
25  
26  
27  
28  
29  
30  
31

### 32 Types of interventions

33 We will include studies of psychological interventions. Expanding on the definition provided  
34 by Hoffman et al. (2007),[12] we will consider an intervention as “psychological” if it is  
35 conceived by the authors of the study as a psychological intervention, or if it is clearly based  
36 on any of the following approaches: cognitive behavioural therapeutic strategies [relaxation,  
37 graded exposure (desensitisation), imagery (distraction), goal setting, operant conditioning],  
38 mindfulness-based stress reduction, acceptance and commitment therapy, cognitive  
39 functional therapy, health-coaching, biofeedback (delivered with a therapeutic intent to  
40 promote muscle relaxation), pain education, and counselling directly employing principles of  
41 psychological theory. Interventions such as cognitive behavioural therapeutic strategies and  
42 biofeedback were purposely included based on their inclusion across a variety of previous  
43 relevant systematic reviews.[12, 15, 17, 18] Additional approaches such as cognitive  
44 functional therapy, health coaching, and acceptance and commitment therapy were included  
45 as they have been neglected in previous reviews. If our search identifies other psychological  
46 interventions which are not explicitly listed above but meet our definition for a psychological  
47 intervention, we will consider including them in our review. Disagreements regarding their  
48 eligibility for inclusion will be resolved by consensus.  
49  
50  
51  
52  
53  
54  
55  
56  
57  
58  
59  
60

We will include studies of combination therapies, defined as interventions that contain two or more psychological approaches delivered together, with or without additional non-psychological co-interventions. There will be no restriction on the non-psychological co-interventions or comparison interventions identified by our search strategy.

### Types of outcome measures

The primary outcomes of interest are physical function and pain intensity:

1. Physical function, defined as lower back specific physical function, measured at the end of treatment. Physical function is commonly measured by continuous, self-report scales (e.g. Oswestry Disability Index (ODI), Roland Morris Disability Questionnaire (RMDQ), Core Outcome Measures Index (COMI), Quebec Back Pain Disability Index (QBPDII) or rating scales within a composite measure (e.g. 12-Item or 36-Item Short Form (SF-12, SF-36)). We will not exclude studies that use other measurement tools.
2. Pain intensity, measured at the time point closest to the end of treatment. Pain intensity is commonly measured by continuous, self-report scales (e.g. Numeric Rating Scale (NRS), Visual Analogue Scale (VAS)) or a rating scale within a composite rating scale (e.g. McGill Pain Questionnaire). We will not exclude studies that use other measurement tools.

Secondary outcomes of interest include:

1. Health-related quality of life, measured at the end of treatment. It is commonly measured by the SF-12, SF-36, EuroQol five-dimension (EQ-5D), Nottingham Health Profile (NHP) and 10-Item Patient-Reported Outcomes Measurement Information System Global Health Short Form (PROMIS-GH-10). We will not exclude studies that use other measurement tools.
2. Fear avoidance, defined as fear of pain and consequent avoidance of movement, measured at the end of treatment. Fear avoidance is commonly measured by the Fear-Avoidance Beliefs Questionnaire (FABQ), Pain Catastrophizing Scale (PCS), Tampa Scale for Kinesiophobia (TSK) and Fear of Pain Questionnaire (FPQ). We will not exclude studies that use other measurement tools.
3. Intervention compliance, measured as the proportion of participants randomised to the intervention group who completed the intervention during the intervention period.

## Study selection

### Electronic searches

The following databases will be searched for eligible studies via OVID from inception until 22 August 2019: MEDLINE, EMBASE, PsycINFO, Cochrane Central Register of Controlled Trials, Web of Science, SCOPUS and CINAHL. Search concepts will include language and keywords for: randomised controlled trial, low back pain, and terms relating to psychological interventions, according to the eligibility criteria defined earlier in the protocol. A full MEDLINE search strategy can be found in Appendix A of this protocol. There will be no restriction on language.

### Additional search strategies

We will search reference lists and perform citation tracking of included studies and relevant systematic reviews[11, 12, 15, 17, 18, 32, 33] and clinical guidelines[26-28] to identify additional eligible studies.

### Identification and selection of studies

Citations identified by our search strategy will be managed using Endnote X9[46] and screened using Covidence.[47] Eligibility screening will be conducted independently by two reviewers in two independent stages: (i) citation titles and abstracts; (ii) full text.

Disagreements will be resolved by consensus or a third reviewer. A PRISMA flow-diagram will be presented to map the number of records included and excluded during the study selection process, with reasons for exclusions reported.

## Data extraction

Two reviewers will independently extract data from the included studies using a pre-designed excel data extraction form. The form will be pilot-tested on a small number of articles.

Disagreements will be resolved by consensus or a third reviewer.

### *Publication characteristics*

We will extract data on the following publication characteristics: first author, publication year, journal, funding, location.

### *Study design characteristics*

1  
2  
3 We will extract data related to the study design, including number of participants randomised  
4 and durations of follow-up.  
5  
6  
7

### 8 *Participant characteristics*

9  
10 We will extract data on the individual study sample, including age, male/female, body mass  
11 index, baseline pain intensity, socioeconomic status and comorbidities.  
12  
13  
14

### 15 *Interventions and Comparators*

16  
17 We will extract data on the interventions of interest and any comparison interventions. We  
18 will extract the key components of the psychological intervention (e.g. details of the specific  
19 psychological principles or approaches used, qualifications of the personnel delivering the  
20 intervention, co-interventions involved) and comparison intervention. We will extract all  
21 available data on intervention dosage and frequency, and intervention duration including  
22 duration of any washout.  
23  
24  
25  
26  
27  
28

### 29 *Outcomes*

30 We will extract the definitions provided for our primary and secondary outcomes of interest.  
31 We will also extract the type and dimensions of the measurement tools used to assess our  
32 primary and secondary outcomes of interest.  
33  
34  
35  
36  
37

### 38 *Results*

39 For intervention compliance, we will extract all data on the number of participants who were  
40 randomised to the intervention group and completed the intervention. If this data is not  
41 available, we will extract the number of participants randomised to the intervention group  
42 who discontinued treatment for any reason (i.e. all-cause discontinuation) within the  
43 intervention period, to calculate the number of participants who completed treatment. We will  
44 express this data as a proportion of the total number of people randomised to the intervention  
45 group. We will extract reasons for all-cause discontinuation during the intervention period if  
46 reported. We will also extract all available data on adherence, adverse and serious adverse  
47 events, including the authors' definitions of these terms.  
48  
49  
50  
51  
52  
53  
54  
55

56 For all other outcome measures, we will preference extracting the mean baseline and outcome  
57 scores (at the time point closest to end of treatment) for each group, and the accompanying  
58 measures of variance or statistics to impute these values. Otherwise, we will extract the  
59  
60

1  
2  
3 change in outcome from baseline and the accompanying measures of variance for each group.  
4 If neither are available, we will extract between-group differences in scores and the  
5 accompanying measures of variance. For the following outcomes, we will extract all  
6 available data in the order which the measurement tools are listed, in accordance with the  
7 proposed hierarchy for analysis. If a given outcome is measured by several measurement  
8 tools not explicitly listed, the hierarchy for analysis will be decided by consensus from the  
9 reviewers.  
10  
11  
12  
13  
14  
15  
16

17 For studies measuring physical function: ODI; RMDQ; COMI; QBPQI; rating scale for  
18 disability from a composite measure of physical function (e.g. SF-12, SF-36); other  
19 measurement tools.[48, 49] For studies measuring pain intensity: NRS; 100mm VAS; 10cm  
20 VAS; rating scale for pain intensity from a composite measure of pain intensity; other  
21 measurement tools.[48, 49] We will extract data on pain intensity at the time point closest to  
22 randomisation and end of treatment, in the order of average pain intensity (preferred); worst  
23 pain intensity, alternative measures of pain intensity. If several alternative measures of pain  
24 intensity are reported, we will calculate an average score. For studies measuring health-  
25 related quality of life: PROMIS-GH-10; EQ-5D; SF-36 or SF-12 (physical component  
26 summary sub-score); SF-36 or SF-12 (mental component summary sub-score); SF-36 (overall  
27 score); NHP;[48, 49] rating scale from a composite measure of health-related quality of life;  
28 other measurement tools. If only an overall score for the SF-36 is provided, we will contact  
29 authors for the physical and mental component summary sub-scores. For studies measuring  
30 fear avoidance: FABQ (physical activity scale); FABQ (work scale); FABQ (overall score);  
31 PCS, TSK; FPQ; rating scales of fear avoidance from a composite measure of fear avoidance;  
32 other measurement tools.[50] If only an overall score for the FABQ is provided, we will  
33 contact authors for the physical activity and work sub-scores. Authors will be contacted for  
34 additional information where necessary.  
35  
36  
37  
38  
39  
40  
41  
42  
43  
44  
45  
46  
47  
48  
49

50 Data will be classified and assessed at the following time-points: (1) pre-intervention; (2)  
51 post-intervention (i.e. timepoint closest to end of treatment); (3) short-term treatment  
52 sustainability ( $\geq 2$  months but  $< 6$  months post-intervention); (4) mid-term treatment  
53 sustainability ( $\geq 6$  months but  $< 12$  months post-intervention); (5) long-term treatment  
54 sustainability ( $\geq 12$  months post-intervention), and NMA will be performed at each time-  
55 point separately.  
56  
57  
58  
59  
60

## Network Treatment Nodes

Using the framework proposed by Caldwell et al. (2016),[51] we will use a splitting approach to classify the psychological interventions. A splitting approach was chosen because psychological interventions are typically complex and heterogenous in nature. For example, two separate trials involving cognitive behavioural therapy may focus on utilising different psychological principles or strategies and incorporate different additional co-interventions (e.g. exercise, passive therapies). Failing to adequately account for the variability, as best as possible, may potentially result in inaccurate estimates of treatment effects. In attempts to account for heterogeneity, we will first scrutinise intervention descriptions to classify the psychological interventions into 5 treatment nodes based on 5 key approaches (behavioural, cognitive behavioural, mindfulness-based, counselling-based and pain education). We will also form a separate treatment node using a lumping method to account for combination approaches (e.g. two or more psychological approaches delivered together). Then, we will further differentiate whether additional non-psychological co-interventions are involved, which will be sub-classified as exercise, passive treatments or physiotherapy. If present, the combination of the psychological approach with a non-psychological co-intervention will form a separate treatment node (e.g. cognitive behavioural therapy plus exercise).

The following treatment nodes will be formed for the psychological interventions:

- Behavioural therapies (e.g. relaxation-based interventions, biofeedback, operant conditioning), which we will consider as psychological approaches focused on facilitating the removal of positive reinforcement of pain behaviours and promoting health behaviours, in the absence of cognitive strategies;[17, 18]
- Cognitive behavioural therapies, which we will consider as the combination of behavioural therapies with an additional focus of changing unhelpful cognitions (i.e. thoughts, beliefs and attitudes), and/or promoting emotion regulation and problem-solving.[17]
- Mindfulness-based therapies, which we will consider as psychological approaches focused on practicing techniques such as meditation, non-judgemental attention control and awareness (e.g. mindfulness-based stress reduction, acceptance and commitment therapy);[19, 52]

- Counselling-based therapies, which we will consider as psychological approaches focused on using supportive communication and active listening techniques to facilitate healthy behaviour change (e.g. health coaching, motivational interviewing);[20, 21]
- Pain education, which we will consider as psychological approaches focused on improving understanding and knowledge about pain. These interventions may involve a biomechanical explanation of LBP, but are clearly focused on the reconceptualisation of beliefs about the pain experience;[53]
- Combinations of psychological interventions (e.g. pain education combined with behavioural therapy), which we will consider as the delivery of two or more psychological approaches together, in the absence of a non-psychological co-intervention.

Non-psychological co-interventions will be classified into the following treatment nodes:

- Exercise, which we will define as interventions that formally prescribe a structured exercise program (e.g. consisting of aerobic, strengthening, stretching, stabilisation, motor control exercises) and/or direct instructions to increase physical activity levels;
- Passive treatment, including but not limited to spinal manipulative therapy, massage, and electrotherapies;
- Physiotherapy, which we will define as interventions delivered by a physiotherapist, which may involve a combination of exercise and passive treatments.

Comparison interventions will be classified into the following treatment nodes:

- Exercise, defined above;
- Passive treatment, defined above;
- Physiotherapy, defined above;
- General practitioner care, which we will define as interventions considered as standard care provided by general practitioners;
- Advice, which we will consider as interventions providing general advice that is not psychologically-informed;
- No intervention (e.g. waitlist control, no intervention).

For comparison interventions described as “usual care” by study authors, we will scrutinise the authors’ descriptions of the intervention to classify them into the above treatment nodes.



1  
2  
3  
4  
5 Figure 1 represents all possible combinations of treatment nodes. Consensus will be sought  
6 regarding accurate classification of interventions prior to conducting statistical analyses.  
7  
8  
9

### 10 **Figure 1. Network plot of all theoretically possible network comparisons**

11  
12

13 Prior to data analysis, we will consult clinical experts from the review team to establish the  
14 appropriateness of further lumping treatment nodes together if there are inadequate number of  
15 studies are available for a given treatment node (e.g. less than two studies available). Any  
16 post-hoc alternative network geometries formed using this approach will be clearly identified  
17 and justified in the final review.  
18  
19  
20  
21  
22  
23

### 24 **Risk of bias in the included studies**

25 Two reviewers will independently assess risk of bias in the included studies using the  
26 Revised Cochrane risk-of-bias tool for randomized trials (RoB 2).[54, 55] We will use the  
27 licensed excel tool to implement the RoB2. We will pilot-test the risk of bias assessment  
28 procedure on a small number of articles. Authors will be contacted for additional information  
29 where necessary. The RoB 2 assesses five domains: (1) bias arising from the randomisation  
30 process; (2) bias due to deviations from intended interventions; (3) bias due to missing  
31 outcome data; (4) bias in measurement of the outcome; (5) bias in selection of the reported  
32 result. Each domain will be graded as low risk of bias, some concerns, or high risk of bias,  
33 and the results will be summarised in a table. For cluster RCTs, we will use the Cochrane  
34 cluster RCT variant of the RoB 2 tool, which assesses an additional domain: bias arising from  
35 identification or recruitment of individual participants within clusters.[56] An overall risk of  
36 bias judgement (low risk of bias, some concerns, or high risk of bias) will be made based on  
37 the five (or six) domain-level judgements, as described in Sterne et al. (2019).[54] Generally,  
38 the overall risk of bias judgement corresponds to the worst risk of bias in any of the five (or  
39 six) domains, however studies with multiple domains graded as 'some concerns' may be  
40 judged as high risk of overall bias.[54] Disagreements will be resolved through consensus or  
41 a third reviewer.  
42  
43  
44  
45  
46  
47  
48  
49  
50  
51  
52  
53  
54  
55

### 56 **Data Analysis**

57 Characteristics of the publications, study designs, study populations, interventions and  
58 comparators, and outcome measures will be summarised descriptively and presented in a  
59  
60

1  
2  
3 table. Pair-wise meta-analysis and NMA will be performed in Stata using the metan  
4 command (with Knapp–Hartung adjustment applied), and the network package and network  
5 graphs package respectively.[57]  
6  
7  
8  
9

### 10 **Measures of treatment effect**

11 For continuous outcomes that use the same rating scale across all studies, we will use mean  
12 differences (MD) and 95% confidence intervals (95% CI). If different rating scales are used  
13 for comparable outcomes, all continuous data for the given outcome will be converted to a  
14 common standardised 0-100 scale. If data is reported as dichotomous, we will use odds ratios  
15 (ORs) and 95% CI.  
16  
17  
18  
19  
20  
21

### 22 **Dealing with missing outcome data and missing statistics**

23 For continuous outcomes, we will impute missing data by converting standard errors, p-  
24 values or CI into standard deviations (SD).[44] If a study only reports the median or  
25 interquartile range (IRQ), SD will be calculated by dividing the IRQ by 1.35, and we will  
26 consider the median to be equivalent to the mean. If relevant information is provided in  
27 figures, we will extract data from the graphs. If data cannot be obtained, we will attempt to  
28 contact authors.  
29  
30  
31  
32  
33  
34  
35

### 36 **Geometry of the network**

37 The network diagram will be used to graphically depict the available evidence. Nodes will be  
38 used to represent the different interventions and comparators, and the weight of the edges will  
39 be used to visually represent the proportional number of studies comparing two connected  
40 nodes within the network.  
41  
42  
43  
44  
45

### 46 **Pairwise meta-analysis**

47 We will perform traditional pairwise meta-analyses of all direct comparisons for which there  
48 are at least two studies available. We will apply the khartung command to adjust for the  
49 Hartung-Knapp-Sidik-Jonkman (HKSJ) random-effects method, which has less error rates  
50 compared to the DerSimonian and Laird approach in particular across studies with greater  
51 heterogeneity and when the number of studies is small.[58] We will use the Q statistic to test  
52 for statistical heterogeneity in pairwise comparisons. We will use  $\alpha < 0.10$  as we  
53 anticipate a few studies per comparison. We will calculate Higgins  $I^2$  statistic to indicate the  
54 proportion of variability in effect estimates due to heterogeneity and interpret  $I^2 > 50\%$  as  
55  
56  
57  
58  
59  
60

1  
2  
3 suggesting substantial heterogeneity.[44] Forest plots will be created to graphically depict  
4 individual and pooled effect sizes. Narrative analysis will be performed if we are unable to  
5 impute missing data or cannot contact authors for data, inadequate number of studies are  
6 available for a given comparison (e.g. <2 studies), or there is substantial heterogeneity.  
7  
8  
9

### 10 11 12 **Assessment of transitivity assumption**

13 Transitivity implies the assumption that distribution of clinical and methodological variables  
14 that could potentially act as effect modifiers across available treatment comparisons is  
15 balanced within a network.[59] Given the lack of conclusive evidence on treatment effect  
16 modifiers for LBP[60] or psychological interventions,[12, 61, 62] we will consider the  
17 following factors to be potential effect modifiers: age,[60] gender,[63] pain intensity, and fear  
18 avoidance.[64] To assess transitivity, we will use Stata to adjust the weight of the edges  
19 within the network plot, proportional to the baseline distribution of the pre-specified effect  
20 modifier, and visually inspect comparability within the network.[59] If minor intransitivity is  
21 suspected (i.e. minor or negligible dissimilarities in the distribution of a given effect modifier  
22 across studies based on clinical judgement), we will proceed with the NMA and perform a  
23 network meta-regression to explore the influence of the suspected factors on the results. If the  
24 distribution of a given effect modifier is clearly dissimilar across studies, we will exclude  
25 network nodes. If intransitivity persists, we will consider not proceeding with NMA.  
26  
27  
28  
29  
30  
31  
32  
33  
34  
35  
36  
37

### 38 **Network meta-analysis**

39 A NMA will be performed using a frequentist approach to simultaneously compare direct and  
40 indirect evidence. The heterogeneity parameter is assumed to be the same for each  
41 comparison within the network. Mean rank and relative treatment rankings will be estimated  
42 for each intervention node according to the surface under the cumulative ranking curve  
43 (SUCRA) values. SUCRA is the p-score which is the frequentist analogy to the Bayesian  
44 SUCRA.[65]  
45  
46  
47  
48  
49  
50

### 51 **Assesment of inconsistency**

52 Valid NMA results rely on the assumption of consistency, which describes statistical  
53 agreement between all sources of evidence within a network. Global inconsistency of the  
54 entire network will be assessed using the design-by-treatment interaction model,[66] which is  
55 a goodness-of-fit test. The presence of inconsistency will be inferred based on  $p < 0.10$ . Local  
56 inconsistencies will be assessed using the Bucher method[67] by computation of  
57  
58  
59  
60

1  
2  
3 inconsistency factors and 95% CI for each triangular and quadratic loop in the network. The  
4 Bucher method will be implemented in Stata using the ifplot command. If inconsistencies are  
5 identified, we will first check for errors in data extraction. Then, we will examine the  
6 potential influence of pre-specified effect modifiers within inconsistent loops using network  
7 meta-regression models and conduct a sensitivity analysis excluding studies that may be the  
8 source of inconsistency (e.g. high risk of bias). Otherwise, we will use a node-splitting  
9 method to further explore the origin of the inconsistency.[68] If substantial inconsistency  
10 remains and the origin remains unexplained, we will consider not proceeding with NMA.  
11  
12  
13  
14  
15  
16  
17  
18

### 19 **Sensitivity and sub-group analysis**

20 To examine robustness of results, we will conduct a sensitivity analysis by excluding studies  
21 with high risk of bias, provided that the original network structure remains the same. We will  
22 also perform the following sub-group analyses depending on available data:  
23  
24

25 (1) Delivery format of psychological intervention (e.g. face-to-face, telephone-administered,  
26 web-based, self-help booklets), the hypothesis is that face-to-face delivery format will result  
27 in greater improvements in disability and pain intensity.  
28  
29

30 (2) Individual versus group-based intervention delivery, the hypothesis is that group-based  
31 interventions will result in greater improvements in disability and pain intensity.  
32  
33

34 (3) Back pain only versus back pain with sciatica (leg pain and nerve root compromise), the  
35 hypothesis is that the back pain only group will result in greater improvements in physical  
36 function and pain intensity.  
37  
38  
39  
40

41 Meta-regression will be performed based on: (1) age; (2) percentage of males; (3) sample  
42 size; (4) baseline physical function levels; (5) baseline pain levels. Further, subject to the  
43 availability of data, we will attempt to perform meta-regressions to explore the effects of  
44 intervention parameters relating to dosage and/or frequency (e.g. total length (in weeks) of  
45 the intervention, total intended hours of the intervention during the intervention period).  
46  
47  
48  
49  
50

### 51 **Publication bias**

52 Publication bias in the NMA will be evaluated by visual inspection of comparison-adjusted  
53 funnel plots for asymmetry. As described above, meta-regression using sample size and effect  
54 estimates will be performed to detected small study effect.[69]  
55  
56  
57  
58  
59  
60

### **Confidence in cumulative evidence**

Judgements of the confidence in cumulative evidence will be evaluated using the Confidence in Network Meta-Analysis (CINeMA) framework,[70] a Cochrane web application of the Grading of Recommendations Assessment, Development, and Evaluation ratings approach. The framework assesses six domains: within-study bias, across-studies bias, indirectness, imprecision, heterogeneity and incoherence.

### **Patient and public involvement**

Patients will not be involved.

### **CONTRIBUTIONS TO LITERATURE**

To date, there is no conclusive consensus regarding the most effective psychological approach for managing chronic non-specific LBP. Previous studies have only investigated a small portion of available psychological interventions and have only conducted multiple independent pairwise meta-analyses which have not been synthesised. As such, clinical guidelines for chronic LBP, which are based on these reviews, remain vague regarding the specific type of psychological intervention which should be incorporated into treatment for the condition. This systematic review with NMA will synthesise direct and indirect evidence for a comprehensive variety of psychological interventions with respect to improving physical function, pain intensity, health-related quality of life, and fear avoidance in people with chronic non-specific LBP. The review will also assess the proportion of compliance to different psychological interventions in this population. The NMA will compare the competing interventions within the network and produce treatment effect estimates. Effect estimates will be used to generate relative treatment rankings, allowing us to rank the different types of psychological approaches for each outcome. Findings from this review will provide pragmatic support for clinical guideline recommendations regarding the use of psychological interventions for adults with chronic non-specific LBP.

### **ETHICS AND DISSEMINATION**

Ethical review will not be required as the systematic review will only involve the use of previously published data for analysis. Our intention is to publish the completed research in a peer-review journal and present our findings at national and international conferences.

### **CONFLICTS OF INTEREST**

There are no conflicts of interest in this study.

## **AUTHOR CONTRIBUTIONS**

All authors conceived the study. EKH drafted the manuscript. EKH, LC and JC participated in the search strategy development. PHF assisted in the initial protocol design, and all authors assisted in the protocol revision. LC provided statistical expertise. CA provided expertise on psychological interventions. All authors read and approved the final manuscript as submitted.

## **FUNDING**

This research received no specific grant from any funding agency in the public, commercial or not-for-profit sectors. PHF is funded by an NHMRC Fellowship and a Sydney University SOAR fellowship. MLF is funded by an NHMRC Fellowship and a Sydney University SOAR fellowship. MS is funded by a Sydney University SOAR fellowship. LC is funded by Northern Clinical School Higher Degree Research Support Scholarship. EKH is funded by an Australian Government Research Training Program Scholarship.

## REFERENCES

1. Sebbag E, Felten R, Sagez F, et al. The World-Wide Burden of Musculoskeletal Diseases: A Systematic Analysis of the World Health Organization Burden of Diseases Database. *Ann Rheum Dis* 2019;**78**(6):844-848.
2. James SL, Abate D, Abate KH, et al. Global, Regional, and National Incidence, Prevalence, and Years Lived with Disability for 354 Diseases and Injuries for 195 Countries and Territories, 1990–2017: A Systematic Analysis for the Global Burden of Disease Study 2017. *The Lancet* 2018;**392**(10159):1789-1858.
3. Dagenais S, Caro J, Haldeman S. A Systematic Review of Low Back Pain Cost of Illness Studies in the United States and Internationally. *Spine J* 2008;**8**(1):8-20.
4. Hartvigsen J, Hancock MJ, Kongsted A, et al. What Low Back Pain Is and Why We Need to Pay Attention. *The Lancet* 2018;**391**(10137):2356-2367.
5. O’Sullivan PB, Caneiro J, O’Keeffe M, et al. Cognitive Functional Therapy: An Integrated Behavioral Approach for the Targeted Management of Disabling Low Back Pain. *Phys Ther* 2018;**98**(5):408-423.
6. O’Keeffe M, George SZ, O’Sullivan PB, et al. Psychosocial factors in low back pain: letting go of our misconceptions can help management. *Brit J Sport Med* 2019;**53**:793-794.
7. Ikemoto T, Miki K, Matsubara T, et al. Psychological Treatment Strategy for Chronic Low Back Pain. *Spine Surg Relat Res* 2019;**3**(3):199-206.
8. Wertli MM, Eugster R, Held U, et al. Catastrophizing—a Prognostic Factor for Outcome in Patients with Low Back Pain: A Systematic Review. *Spine J* 2014;**14**(11):2639-2657.
9. Pinheiro MB, Ferreira ML, Refshauge K, et al. Symptoms of Depression as a Prognostic Factor for Low Back Pain: A Systematic Review. *Spine Journal* 2016;**16**(1):105-116.
10. Buchbinder R, van Tulder M, Öberg B, et al. Low Back Pain: A Call for Action. *The Lancet* 2018;**391**(10137):2384-2388.
11. van Tulder MW, Ostelo R, Vlaeyen JW, et al. Behavioral Treatment for Chronic Low Back Pain: A Systematic Review within the Framework of the Cochrane Back Review Group. *Spine* 2000;**25**(20):2688-2699.
12. Hoffman BM, Papas RK, Chatkoff DK, et al. Meta-Analysis of Psychological Interventions for Chronic Low Back Pain. *Health Psychol* 2007;**26**(1):1.
13. Cramer H, Haller H, Lauche R, et al. Mindfulness-Based Stress Reduction for Low Back Pain. A Systematic Review. *BMC Complem Altern M* 2012;**12**(1):162.

14. Wilson S and Cramp F. Combining a Psychological Intervention with Physiotherapy: A Systematic Review to Determine the Effect on Physical Function and Quality of Life for Adults with Chronic Pain. *Phys Ther Rev* 2018;**23**(3):214-226.
15. Guzmán J, Esmail R, Karjalainen K, et al. Multidisciplinary Rehabilitation for Chronic Low Back Pain: Systematic Review. *BMJ* 2001;**322**(7301):1511-1516.
16. Silva Guerrero AV, Maujean A, Campbell L, et al. A Systematic Review and Meta-Analysis of the Effectiveness of Psychological Interventions Delivered by Physiotherapists on Pain, Disability and Psychological Outcomes in Musculoskeletal Pain Conditions. *Clinical J Pain* 2018;**34**(9):838-857.
17. Vitoula K, Venneri A, Varrassi G, et al. Behavioral Therapy Approaches for the Management of Low Back Pain: An up-to-Date Systematic Review. *Pain and Therapy* 2018;**7**(1):1-12.
18. Henschke N, Ostelo RW, van Tulder MW, et al. Behavioural Treatment for Chronic Low-Back Pain. *Cochrane Db Syst Rev* 2010;**7**(7):CD002014.
19. Anheyer D, Haller H, Barth J, et al. Mindfulness-Based Stress Reduction for Treating Low Back Pain: A Systematic Review and Meta-Analysis. *Ann Intern Med* 2017;**166**(11):799-807.
20. Holden J, Davidson M, O'Halloran P. Health Coaching for Low Back Pain: A Systematic Review of the Literature. *Int J Clin Pract* 2014;**68**(8):950-962.
21. Boehmer KR, Barakat S, Ahn S, et al. Health Coaching Interventions for Persons with Chronic Conditions: A Systematic Review and Meta-Analysis Protocol. *Syst Rev* 2016;**5**(1):146.
22. Wood L and Hendrick PA. A Systematic Review and Meta-Analysis of Pain Neuroscience Education for Chronic Low Back Pain: Short-and Long-Term Outcomes of Pain and Disability. *Eur J Pain* 2019;**23**(2):234-249.
23. Martinez-Calderon J, Flores-Cortés M, Morales-Asencio JM, et al. Conservative Interventions Reduce Fear in Individuals with Chronic Low Back Pain: A Systematic Review. *Arch Phys Med Rehab* 2019;**101**(2):329-358.
24. Chung EJ, Hur Y-G, Lee B-H. A Study of the Relationship among Fear-Avoidance Beliefs, Pain and Disability Index in Patients with Low Back Pain. *J Exerc Rehabil* 2013;**9**(6):532.
25. Ferrari S, Chiarotto A, Pellizzer M, et al. Pain Self-Efficacy and Fear of Movement Are Similarly Associated with Pain Intensity and Disability in Italian Patients with Chronic Low Back Pain. *Pain Pract* 2016;**16**(8):1040-1047.
26. de Campos TF. Low Back Pain and Sciatica in over 16s: Assessment and Management Nice Guideline [Ng59]. *J Physiother* 2017;**63**(2):120.



- 1  
2  
3 27. Qaseem A, Wilt TJ, McLean RM, et al. Noninvasive Treatments for Acute, Subacute, and  
4 Chronic Low Back Pain: A Clinical Practice Guideline from the American College of  
5 Physicians. *Ann Intern Med* 2017;**166**(7):514-530.  
6  
7  
8 28. Chou R, Deyo R, Friedly J, et al. Nonpharmacologic Therapies for Low Back Pain: A  
9 Systematic Review for an American College of Physicians Clinical Practice Guideline. *Ann*  
10 *Intern Med* 2017;**166**(7), 493-505.  
11  
12 29. Van Wambeke P, Desomer A, Aillet L, et al. Low Back Pain and Radicular Pain:  
13 Assessment and Management. *KCE Report*. 2017;**287**.  
14  
15 30. Toward Optimized Practice (TOP) and Low Back Pain Working Group. Evidence-  
16 Informed Primary Care Management of Low Back Pain: Clinical Practice Guideline (3rd  
17 Edition). 2015. Edmonton, AB.  
18  
19 31. Foster NE, Anema JR, Cherkin D, et al. Prevention and Treatment of Low Back Pain:  
20 Evidence, Challenges, and Promising Directions. *The Lancet* 2018;**391**(10137):2368-2383.  
21  
22 32. Morley S, Eccleston C, Williams A. Systematic Review and Meta-Analysis of Randomized  
23 Controlled Trials of Cognitive Behaviour Therapy and Behaviour Therapy for Chronic Pain in  
24 Adults, Excluding Headache. *Pain* 1999;**80**(1-2):1-13.  
25  
26 33. Nielson WR and Weir R. Biopsychosocial Approaches to the Treatment of Chronic Pain.  
27 *Clin J Pain* 2001;**17**(4):S114-S127.  
28  
29 34. O'Keeffe M, O'Sullivan P, Purtill H, et al. Cognitive Functional Therapy Compared with a  
30 Group-Based Exercise and Education Intervention for Chronic Low Back Pain: A Multicentre  
31 Randomised Controlled Trial (RCT). *Brit J Sport Med*. Published Online First: 19 October  
32 2019. doi: 10.1136/bjsports-2019-100780  
33  
34 35. Godfrey E, Wileman V, Holmes MG, et al. Physical Therapy Informed by Acceptance and  
35 Commitment Therapy (Pact) Versus Usual Care Physical Therapy for Adults with Chronic  
36 Low Back Pain: A Randomized Controlled Trial. *J Pain*. Published Online First: 5 June 2019.  
37 In press. <https://doi.org/10.1016/j.jpain.2019.05.012>  
38  
39 36. Synnott A, O'Keeffe M, Bunzli S, et al. Physiotherapists May Stigmatise or Feel  
40 Unprepared to Treat People with Low Back Pain and Psychosocial Factors That Influence  
41 Recovery: A Systematic Review. *J Physiother* 2015;**61**(2):68-76.  
42  
43 37. Alexanders J, Anderson A, Henderson S. Musculoskeletal Physiotherapists' Use of  
44 Psychological Interventions: A Systematic Review of Therapists' Perceptions and Practice.  
45 *Physiotherapy* 2015;**101**(2):95-102.  
46  
47 38. Holopainen MR, Simpson MP, Piirainen A, et al. Physiotherapists' Perceptions of Learning  
48 and Implementing a Biopsychosocial Intervention to Treat Musculoskeletal Pain Conditions: A  
49  
50  
51  
52  
53  
54  
55  
56  
57  
58  
59  
60

- 1  
2  
3 Systematic Review and Metasynthesis of Qualitative Studies. *Pain*. Published Online First: 16  
4 January 2020. In press. doi: 10.1097/j.pain.0000000000001809  
5  
6 39. Gardner T, Refshauge K, Smith L, et al. Physiotherapists' Beliefs and Attitudes Influence  
7 Clinical Practice in Chronic Low Back Pain: A Systematic Review of Quantitative and  
8 Qualitative Studies. *J Physiother* 2017;**63**(3):132-143.  
9  
10 40. Dias S, Welton NJ, Sutton AJ, et al. Evidence Synthesis for Decision Making 1:  
11 Introduction. *Med Decis Making* 2013;**33**(5):597-606.  
12  
13 41. Moher D, Liberati A, Tetzlaff J. Preferred Reporting Items for Systematic Reviews and  
14 Meta-Analyses: The Prisma Statement. *Ann Intern Med* 2009;**151**.  
15  
16 42. Moher D, Shamseer L, Clarke M, et al. Preferred Reporting Items for Systematic Review  
17 and Meta-Analysis Protocols (Prisma-P) 2015 Statement. *Syst Rev* 2015;**4**(1):1.  
18  
19 43. Hutton B, Catala-Lopez F, Moher D. The Prisma Statement Extension for Systematic  
20 Reviews Incorporating Network Meta-Analysis: Prisma-Nma. *Med Clin (Barc)*  
21 2016;**147**(6):262-266.  
22  
23 44. Higgins JPT TJ, Chandler J, Cumpston M, Li T, Page MJ, Welch VA (editors). Cochrane  
24 Handbook for Systematic Reviews of Interventions Version 6.0 (Updated July 2019). 2019:  
25 Cochrane, 2019. Available from [www.training.cochrane.org/handbook](http://www.training.cochrane.org/handbook).  
26  
27 45. Savigny P, Kuntze S, Watson P, et al. Low Back Pain: Early Management of Persistent  
28 Non-Specific Low Back Pain. London: National Collaborating Centre for Primary Care and  
29 Royal College of General Practitioners. 2009;**14**(NICE Clinical Guidelines, No. 88).  
30  
31 46. Clarivate Analytics. Endnote X9. 2020.  
32  
33 47. Covidence. *Covidence Systematic Review Software*. Veritas Health Innovation. Melbourne,  
34 Australia; Available from: <https://www.covidence.org/>.  
35  
36 48. Chiarotto A, Boers M, Deyo RA, et al. Core Outcome Measurement Instruments for  
37 Clinical Trials in Nonspecific Low Back Pain. *Pain* 2018;**159**(3):481.  
38  
39 49. Clement RC, Welander A, Stowell C, et al. A Proposed Set of Metrics for Standardized  
40 Outcome Reporting in the Management of Low Back Pain. *Acta Orthop* 2015;**86**(5):523-533.  
41  
42 50. George SZ, Valencia C, Beneciuk JM. A Psychometric Investigation of Fear-Avoidance  
43 Model Measures in Patients with Chronic Low Back Pain. *J Orthop Sport Phys*  
44 2010;**40**(4):197-205.  
45  
46 51. Caldwell DM and Welton NJ. Approaches for Synthesising Complex Mental Health  
47 Interventions in Meta-Analysis. *Evid Based Ment Health* 2016;**19**(1):16-21.  
48  
49 52. Semple RJ. Does Mindfulness Meditation Enhance Attention? A Randomized Controlled  
50 Trial. *Mindfulness* 2010;**1**(2):121-130.  
51  
52  
53  
54  
55  
56  
57  
58  
59  
60

- 1  
2  
3 53. Louw A, Diener I, Landers MR, et al. Preoperative Pain Neuroscience Education for  
4 Lumbar Radiculopathy: A Multicenter Randomized Controlled Trial with 1-Year Follow-Up.  
5 *Spine* 2014;**39**(18):1449-1457.  
6  
7  
8 54. Sterne JA, Savović J, Page MJ, et al. Rob 2: A Revised Tool for Assessing Risk of Bias in  
9 Randomised Trials. *BMJ* 2019;**366**:14898.  
10  
11 55. Higgins JP, Sterne JA, Savovic J, et al. A Revised Tool for Assessing Risk of Bias in  
12 Randomized Trials. *Cochrane Db Syst Rev* 2016;**10**(Suppl 1):29-31.  
13  
14 56. Eldridge S, Campbell M, Campbell M, et al. Revised Cochrane Risk of Bias Tool for  
15 Randomized Trials (Rob 2.0): Additional Considerations for Cluster-Randomized Trials. 2016.  
16  
17 57. StataCorp. Stata Statistical Software:Version 13. 2017.  
18  
19 58. IntHout J, Ioannidis JP, Borm GF. The Hartung-Knapp-Sidik-Jonkman Method for Random  
20 Effects Meta-Analysis Is Straightforward and Considerably Outperforms the Standard  
21 Dersimonian-Laird Method. *BMC Med Res Methodol* 2014;**14**(1):25.  
22  
23 59. Salanti G, Ades A, Ioannidis JP. Graphical Methods and Numerical Summaries for  
24 Presenting Results from Multiple-Treatment Meta-Analysis: An Overview and Tutorial. *J Clin*  
25 *Epidemiol* 2011;**64**(2):163-171.  
26  
27 60. Gurung T, Ellard DR, Mistry D, et al. Identifying Potential Moderators for Response to  
28 Treatment in Low Back Pain: A Systematic Review. *Physiotherapy* 2015;**101**(3):243-251.  
29  
30 61. Wang RAH, Nelson-Coffey SK, Layous K, et al. Moderators of Wellbeing Interventions:  
31 Why Do Some People Respond More Positively Than Others? *PloS One* 2017;**12**(11).  
32  
33 62. DasMahapatra P, Chiauzzi E, Pujol LM, et al. Mediators and Moderators of Chronic Pain  
34 Outcomes in an Online Self-Management Program. *Clin J Pain* 2015;**31**(5):404-413.  
35  
36 63. Rojiani R, Santoyo JF, Rahrig H, et al. Women Benefit More Than Men in Response to  
37 College-Based Meditation Training. *Frontiers in Psychology* 2017;**8**:551.  
38  
39 64. Wertli MM, Rasmussen-Barr E, Held U, et al. Fear-Avoidance Beliefs—a Moderator of  
40 Treatment Efficacy in Patients with Low Back Pain: A Systematic Review. *Spine J*  
41 2014;**14**(11):2658-2678.  
42  
43 65. Rücker G and Schwarzer G. Ranking Treatments in Frequentist Network Meta-Analysis  
44 Works without Resampling Methods. *BMC Med Res Methodol* 2015;**15**(1):58.  
45  
46 66. Higgins J, Jackson D, Barrett J, et al. Consistency and Inconsistency in Network  
47 Meta-Analysis: Concepts and Models for Multi-Arm Studies. *Res Synth Methods*  
48 2012;**3**(2):98-110.  
49  
50  
51  
52  
53  
54  
55  
56  
57  
58  
59  
60

- 1  
2  
3 67. Bucher HC, Guyatt GH, Griffith LE, et al. The Results of Direct and Indirect Treatment  
4 Comparisons in Meta-Analysis of Randomized Controlled Trials. *J Clin Epidemiol*  
5 1997;**50**(6):683-691.  
6  
7  
8 68. White IR. Network Meta-Analysis. *The Stata Journal*. 2015;**15**(4):951-985.  
9  
10 69. Chaimani A and Salanti G. Using Network Meta-Analysis to Evaluate the Existence of  
11 Small-Study Effects in a Network of Interventions. *Res Synth Methods* 2012;**3**(2):161-176.  
12  
13 70. Institute of Social and Preventive Medicine. *Cinema: Confidence in Network Meta-*  
14 *Analysis* 2017; Available from: [cinema.ispm.unibe.ch](http://cinema.ispm.unibe.ch).  
15  
16  
17  
18  
19  
20  
21  
22  
23  
24  
25  
26  
27  
28  
29  
30  
31  
32  
33  
34  
35  
36  
37  
38  
39  
40  
41  
42  
43  
44  
45  
46  
47  
48  
49  
50  
51  
52  
53  
54  
55  
56  
57  
58  
59  
60

For peer review only

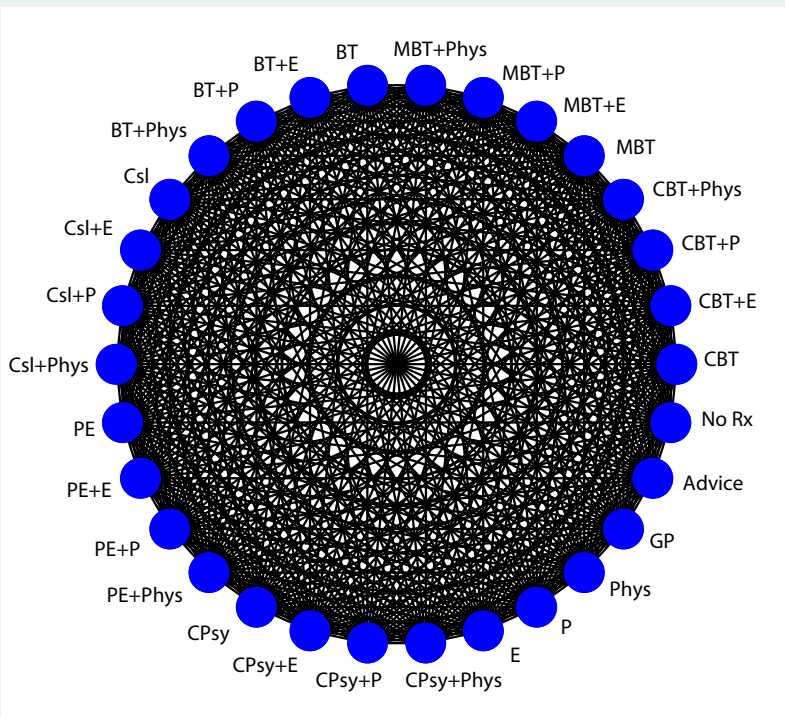

23 BT: behavioural therapies; CBT: cognitive behavioural therapies; MBT: mindfulness-based therapies; Csl: counselling-based therapies;  
 24 PE: pain education; CPsy: combination of psychological interventions; E: exercise; P: passive treatment; Phys: physiotherapy; GP:  
 25 general practitioner care; No Rx: no intervention.  
 26 <http://bmjopen.bmj.com/site/about/guidelines.xhtml>

**APPENDIX A**

Database: Ovid MEDLINE

1. exp Back Pain/ or exp Low Back Pain/ or exp Backache/
2. (back pain or low back pain or lumbar pain or lumbago or dorsalgia or spinal pain or vertebral pain or backache or lumbar spine).ti,ab.
3. 1 or 2
4. exp Behavior Therapy/ or exp Cognitive Therapy/ or \*Conditioning, Operant/ or exp Reinforcement, Psychology/
5. (operant conditioning or reinforcement or psychological intervention or psychological therapy).ab,ti.
6. (cognitiv\* adj1 (treatment\* or therap\* or intervention\*)).ab,ti.
7. (behavio?r\* adj1 (treatment\* or therap\* or intervention\* or techniqu\* or modific\* or change\*)).ab,ti.
8. (graded exposure or desensiti\* or imagery or goal setting).ab,ti.
9. (acceptance and commitment therapy or CBT).ab,ti.
10. 4 or 5 or 6 or 7 or 8 or 9
11. exp Mindfulness/ or \*Mind-Body Therapies/ or exp Meditation/ or exp Relaxation/ or exp Relaxation Therapy/
12. (mindfulness based stress reduction\*).ab,ti.
13. (mindfulness or mind-body therapies or meditation or relaxation or relaxation therap\*).ab,ti.
14. (mbsr\* or mbct\*).ab,ti.
15. 11 or 12 or 13 or 14
16. (cognitive functional therapy or CFT).ab,ti.
17. exp Health Education/ or exp Health Promotion/ or exp Motivation/
18. (health education or health promotion or motivation).ab,ti.
19. ((health or wellness or life-style or behav\*) adj1 coach\*).ab,ti.
20. ((wellness or behav\*) adj1 intervention\*).ab,ti.
21. or/ 17 or 18 or 19 or 20
22. exp Biofeedback, Psychology/ or exp Feedback, Psychological/
23. (electromyograph\* or electromyogram\* or EMG\*).ab,ti.
24. (bio-feedback or feedback).ab,ti.
25. 22 or 23 or 24

- 1
  - 2
  - 3
  - 4
  - 5
  - 6
  - 7
  - 8
  - 9
  - 10
  - 11
  - 12
  - 13
  - 14
  - 15
  - 16
  - 17
  - 18
  - 19
  - 20
  - 21
  - 22
  - 23
  - 24
  - 25
  - 26
  - 27
  - 28
  - 29
  - 30
  - 31
  - 32
  - 33
  - 34
  - 35
  - 36
  - 37
  - 38
  - 39
  - 40
  - 41
  - 42
  - 43
  - 44
  - 45
  - 46
  - 47
  - 48
  - 49
  - 50
  - 51
  - 52
  - 53
  - 54
  - 55
  - 56
  - 57
  - 58
  - 59
  - 60
26. (pain neuroscience education or pain education or neuroscience education or pain physiology education or neuro-physiology education or therapeutic education).ab,ti.
27. exp Counseling/
28. (counseling or supportive psychotherap\*).ab,ti.
29. 27 or 28
30. 10 or 15 or 16 or 21 or 25 or 26 or 29
31. 3 and 30
32. exp Randomized controlled trial/ or \*Clinical Trial/ or \*Random allocation/ or exp Controlled clinical trial/
33. randomized controlled trial.pt.
34. (random\* adj3 trial).ab,ti.
35. (clinical trial or random allocation or controlled clinical trial).ab,ti.
36. 32 or 33 or 34 or 35
37. 31 and 36
38. limit 37 to humans

PRISMA NMA Checklist of Items to Include When Reporting A Systematic Review Involving a Network Meta-analysis

| Section/Topic             | Item # | Checklist Item                                                                                                                                                                                                                                                                                                                                                                                                                                                                                                                                                                                                                                                                                                                                                                          | Reported on Page # |
|---------------------------|--------|-----------------------------------------------------------------------------------------------------------------------------------------------------------------------------------------------------------------------------------------------------------------------------------------------------------------------------------------------------------------------------------------------------------------------------------------------------------------------------------------------------------------------------------------------------------------------------------------------------------------------------------------------------------------------------------------------------------------------------------------------------------------------------------------|--------------------|
| <b>TITLE</b>              |        |                                                                                                                                                                                                                                                                                                                                                                                                                                                                                                                                                                                                                                                                                                                                                                                         |                    |
| Title                     | 1      | Identify the report as a systematic review <i>incorporating a network meta-analysis (or related form of meta-analysis)</i> .                                                                                                                                                                                                                                                                                                                                                                                                                                                                                                                                                                                                                                                            | 1                  |
| <b>ABSTRACT</b>           |        |                                                                                                                                                                                                                                                                                                                                                                                                                                                                                                                                                                                                                                                                                                                                                                                         |                    |
| Structured summary        | 2      | Provide a structured summary including, as applicable:<br><b>Background:</b> main objectives<br><b>Methods:</b> data sources; study eligibility criteria, participants, and interventions; study appraisal; and <i>synthesis methods, such as network meta-analysis</i> .<br><b>Results:</b> number of studies and participants identified; summary estimates with corresponding confidence/credible intervals; <i>treatment rankings may also be discussed. Authors may choose to summarize pairwise comparisons against a chosen treatment included in their analyses for brevity.</i><br><b>Discussion/Conclusions:</b> limitations; conclusions and implications of findings.<br><b>Other:</b> primary source of funding; systematic review registration number with registry name. | 2                  |
| <b>INTRODUCTION</b>       |        |                                                                                                                                                                                                                                                                                                                                                                                                                                                                                                                                                                                                                                                                                                                                                                                         |                    |
| Rationale                 | 3      | Describe the rationale for the review in the context of what is already known, <i>including mention of why a network meta-analysis has been conducted</i> .                                                                                                                                                                                                                                                                                                                                                                                                                                                                                                                                                                                                                             | 4-7                |
| Objectives                | 4      | Provide an explicit statement of questions being addressed, with reference to participants, interventions, comparisons, outcomes, and study design (PICOS).                                                                                                                                                                                                                                                                                                                                                                                                                                                                                                                                                                                                                             | 7                  |
| <b>METHODS</b>            |        |                                                                                                                                                                                                                                                                                                                                                                                                                                                                                                                                                                                                                                                                                                                                                                                         |                    |
| Protocol and registration | 5      | Indicate whether a review protocol exists and if and where it can be accessed (e.g., Web address); and, if available, provide registration information, including registration number.                                                                                                                                                                                                                                                                                                                                                                                                                                                                                                                                                                                                  | 7                  |
| Eligibility criteria      | 6      | Specify study characteristics (e.g., PICOS, length of follow-up) and report characteristics (e.g., years considered, language, publication status) used as criteria for eligibility, giving rationale. <i>Clearly describe eligible treatments included in the treatment network, and note whether any have been clustered or merged into the same node (with justification)</i> .                                                                                                                                                                                                                                                                                                                                                                                                      | 7-9                |
| Information sources       | 7      | Describe all information sources (e.g., databases with dates of coverage, contact with study authors to identify additional studies) in the search and date last searched.                                                                                                                                                                                                                                                                                                                                                                                                                                                                                                                                                                                                              | 10                 |
| Search                    | 8      | Present full electronic search strategy for at least one database, including any limits used, such that it could be repeated.                                                                                                                                                                                                                                                                                                                                                                                                                                                                                                                                                                                                                                                           | Appendix A         |
| Study selection           | 9      | State the process for selecting studies (i.e., screening, eligibility, included in systematic review, and, if applicable,                                                                                                                                                                                                                                                                                                                                                                                                                                                                                                                                                                                                                                                               | 10                 |



|  |                                        |                                                                                                                                                                                                                                                                                                                                                                                                                                                      |              |
|--|----------------------------------------|------------------------------------------------------------------------------------------------------------------------------------------------------------------------------------------------------------------------------------------------------------------------------------------------------------------------------------------------------------------------------------------------------------------------------------------------------|--------------|
|  |                                        | included in the meta-analysis).                                                                                                                                                                                                                                                                                                                                                                                                                      |              |
|  | Data collection process                | 10 Describe method of data extraction from reports (e.g., piloted forms, independently, in duplicate) and any processes for obtaining and confirming data from investigators.                                                                                                                                                                                                                                                                        | <b>10-12</b> |
|  | Data items                             | 11 List and define all variables for which data were sought (e.g., PICOS, funding sources) and any assumptions and simplifications made.                                                                                                                                                                                                                                                                                                             | <b>10-12</b> |
|  | <b>Geometry of the network</b>         | <b>S1</b> Describe methods used to explore the geometry of the treatment network under study and potential biases related to it. This should include how the evidence base has been graphically summarized for presentation, and what characteristics were compiled and used to describe the evidence base to readers.                                                                                                                               | <b>16</b>    |
|  | Risk of bias within individual studies | 12 Describe methods used for assessing risk of bias of individual studies (including specification of whether this was done at the study or outcome level), and how this information is to be used in any data synthesis.                                                                                                                                                                                                                            | <b>15</b>    |
|  | Summary measures                       | 13 State the principal summary measures (e.g., risk ratio, difference in means). <i>Also describe the use of additional summary measures assessed, such as treatment rankings and surface under the cumulative ranking curve (SUCRA) values, as well as modified approaches used to present summary findings from meta-analyses.</i>                                                                                                                 | <b>16-17</b> |
|  | Planned methods of analysis            | 14 Describe the methods of handling data and combining results of studies for each network meta-analysis. This should include, but not be limited to: <ul style="list-style-type: none"> <li>• <i>Handling of multi-arm trials;</i></li> <li>• <i>Selection of variance structure;</i></li> <li>• <i>Selection of prior distributions in Bayesian analyses; and</i></li> <li>• <i>Assessment of model fit.</i></li> </ul>                            | <b>16-18</b> |
|  | <b>Assessment of Inconsistency</b>     | <b>S2</b> Describe the statistical methods used to evaluate the agreement of direct and indirect evidence in the treatment network(s) studied. Describe efforts taken to address its presence when found.                                                                                                                                                                                                                                            | <b>17</b>    |
|  | Risk of bias across studies            | 15 Specify any assessment of risk of bias that may affect the cumulative evidence (e.g., publication bias, selective reporting within studies).                                                                                                                                                                                                                                                                                                      | <b>18-19</b> |
|  | Additional analyses                    | 16 Describe methods of additional analyses if done, indicating which were pre-specified. This may include, but not be limited to, the following: <ul style="list-style-type: none"> <li>• Sensitivity or subgroup analyses;</li> <li>• Meta-regression analyses;</li> <li>• <i>Alternative formulations of the treatment network; and</i></li> <li>• <i>Use of alternative prior distributions for Bayesian analyses (if applicable).</i></li> </ul> | <b>18</b>    |

1  
2  
3  
4  
5  
6  
7  
8  
9  
10  
11  
12  
13  
14  
15  
16  
17  
18  
19  
20  
21  
22  
23  
24  
25  
26  
27  
28  
29  
30  
31  
32  
33  
34  
35  
36  
37  
38  
39  
40  
41  
42  
43  
44  
45  
46  
47  
48  
49  
50  
51  
52  
53  
54  
55  
56  
57  
58  
59  
60**RESULTS†**

|                                          |           |                                                                                                                                                                                                                                                                                                                                                                                                                                                              |                             |
|------------------------------------------|-----------|--------------------------------------------------------------------------------------------------------------------------------------------------------------------------------------------------------------------------------------------------------------------------------------------------------------------------------------------------------------------------------------------------------------------------------------------------------------|-----------------------------|
| Study selection                          | 17        | Give numbers of studies screened, assessed for eligibility, and included in the review, with reasons for exclusions at each stage, ideally with a flow diagram.                                                                                                                                                                                                                                                                                              | <i>N/A – protocol paper</i> |
| <b>Presentation of network structure</b> | <b>S3</b> | Provide a network graph of the included studies to enable visualization of the geometry of the treatment network.                                                                                                                                                                                                                                                                                                                                            | <i>N/A – protocol paper</i> |
| <b>Summary of network geometry</b>       | <b>S4</b> | Provide a brief overview of characteristics of the treatment network. This may include commentary on the abundance of trials and randomized patients for the different interventions and pairwise comparisons in the network, gaps of evidence in the treatment network, and potential biases reflected by the network structure.                                                                                                                            | <i>N/A – protocol paper</i> |
| Study characteristics                    | 18        | For each study, present characteristics for which data were extracted (e.g., study size, PICOS, follow-up period) and provide the citations.                                                                                                                                                                                                                                                                                                                 | <i>N/A – protocol paper</i> |
| Risk of bias within studies              | 19        | Present data on risk of bias of each study and, if available, any outcome level assessment.                                                                                                                                                                                                                                                                                                                                                                  | <i>N/A – protocol paper</i> |
| Results of individual studies            | 20        | For all outcomes considered (benefits or harms), present, for each study: 1) simple summary data for each intervention group, and 2) effect estimates and confidence intervals. <i>Modified approaches may be needed to deal with information from larger networks.</i>                                                                                                                                                                                      | <i>N/A – protocol paper</i> |
| Synthesis of results                     | 21        | Present results of each meta-analysis done, including confidence/credible intervals. <i>In larger networks, authors may focus on comparisons versus a particular comparator (e.g. placebo or standard care), with full findings presented in an appendix. League tables and forest plots may be considered to summarize pairwise comparisons.</i> If additional summary measures were explored (such as treatment rankings), these should also be presented. | <i>N/A – protocol paper</i> |
| <b>Exploration for inconsistency</b>     | <b>S5</b> | Describe results from investigations of inconsistency. This may include such information as measures of model fit to compare consistency and inconsistency models, <i>P</i> values from statistical tests, or summary of inconsistency estimates from different parts of the treatment network.                                                                                                                                                              | <i>N/A – protocol paper</i> |
| Risk of bias across studies              | 22        | Present results of any assessment of risk of bias across studies for the evidence base being studied.                                                                                                                                                                                                                                                                                                                                                        | <i>N/A – protocol paper</i> |
| Results of additional analyses           | 23        | Give results of additional analyses, if done (e.g., sensitivity or subgroup analyses, meta-regression analyses, <i>alternative network geometries studied, alternative choice of prior distributions for Bayesian analyses, and so forth</i> ).                                                                                                                                                                                                              | <i>N/A – protocol paper</i> |
| <b>DISCUSSION</b>                        |           |                                                                                                                                                                                                                                                                                                                                                                                                                                                              |                             |
| Summary of evidence                      | 24        | Summarize the main findings, including the strength of evidence for each main outcome; consider their relevance to key groups (e.g., healthcare providers, users, and policy-makers).                                                                                                                                                                                                                                                                        | <i>N/A – protocol paper</i> |

|    |                |    |                                                                                                                                                                                                                                                                                                                                                                                                                                |                             |
|----|----------------|----|--------------------------------------------------------------------------------------------------------------------------------------------------------------------------------------------------------------------------------------------------------------------------------------------------------------------------------------------------------------------------------------------------------------------------------|-----------------------------|
| 1  | Limitations    | 25 | Discuss limitations at study and outcome level (e.g., risk of bias), and at review level (e.g., incomplete retrieval of identified research, reporting bias). <i>Comment on the validity of the assumptions, such as transitivity and consistency. Comment on any concerns regarding network geometry (e.g., avoidance of certain comparisons).</i>                                                                            | <i>N/A – protocol paper</i> |
| 2  |                |    |                                                                                                                                                                                                                                                                                                                                                                                                                                |                             |
| 3  |                |    |                                                                                                                                                                                                                                                                                                                                                                                                                                |                             |
| 4  |                |    |                                                                                                                                                                                                                                                                                                                                                                                                                                |                             |
| 5  |                |    |                                                                                                                                                                                                                                                                                                                                                                                                                                |                             |
| 6  |                |    |                                                                                                                                                                                                                                                                                                                                                                                                                                |                             |
| 7  |                |    |                                                                                                                                                                                                                                                                                                                                                                                                                                |                             |
| 8  | Conclusions    | 26 | Provide a general interpretation of the results in the context of other evidence, and implications for future research.                                                                                                                                                                                                                                                                                                        | <i>N/A – protocol paper</i> |
| 9  |                |    |                                                                                                                                                                                                                                                                                                                                                                                                                                |                             |
| 10 |                |    |                                                                                                                                                                                                                                                                                                                                                                                                                                |                             |
| 11 |                |    |                                                                                                                                                                                                                                                                                                                                                                                                                                |                             |
| 12 | <b>FUNDING</b> |    |                                                                                                                                                                                                                                                                                                                                                                                                                                |                             |
| 13 | Funding        | 27 | Describe sources of funding for the systematic review and other support (e.g., supply of data); role of funders for the systematic review. This should also include information regarding whether funding has been received from manufacturers of treatments in the network and/or whether some of the authors are content experts with professional conflicts of interest that could affect use of treatments in the network. | <b>20</b>                   |
| 14 |                |    |                                                                                                                                                                                                                                                                                                                                                                                                                                |                             |
| 15 |                |    |                                                                                                                                                                                                                                                                                                                                                                                                                                |                             |
| 16 |                |    |                                                                                                                                                                                                                                                                                                                                                                                                                                |                             |
| 17 |                |    |                                                                                                                                                                                                                                                                                                                                                                                                                                |                             |
| 18 |                |    |                                                                                                                                                                                                                                                                                                                                                                                                                                |                             |
| 19 |                |    |                                                                                                                                                                                                                                                                                                                                                                                                                                |                             |
| 20 |                |    |                                                                                                                                                                                                                                                                                                                                                                                                                                |                             |
| 21 |                |    |                                                                                                                                                                                                                                                                                                                                                                                                                                |                             |

PICOS = population, intervention, comparators, outcomes, study design.

\* Text in italics indicates wording specific to reporting of network meta-analyses that has been added to guidance from the PRISMA statement.

† Authors may wish to plan for use of appendices to present all relevant information in full detail for items in this section.

### **Box. Terminology: Reviews With Networks of Multiple Treatments**

Different terms have been used to identify systematic reviews that incorporate a network of multiple treatment comparisons. A brief overview of common terms follows.

*Indirect treatment comparison:* Comparison of 2 interventions for which studies against a common comparator, such as placebo or a standard treatment, are available (i.e., indirect information). The direct treatment effects of each intervention against the common comparator (i.e., treatment effects from a comparison of interventions made within a study) may be used to estimate an indirect treatment comparison between the 2 interventions (**Appendix Figure 1, A**). An indirect treatment comparison (ITC) may also involve multiple links. For example, in **Appendix Figure 1, B**, treatments B and D may be compared indirectly on the basis of studies encompassing comparisons of B versus C, A versus C, and A versus D.

*Network meta-analysis or mixed treatment comparison:* These terms, which are often used interchangeably, refer to situations involving the simultaneous comparison of 3 or more interventions. Any network of treatments consisting of strictly unclosed loops can be thought of as a series of ITCs (**Appendix Figure 1, A and B**). In mixed treatment comparisons, both direct and indirect information is available to inform the effect size estimates for at least some of the comparisons; visually, this is shown by closed loops in a network graph (**Appendix Figure 1, C**). Closed loops are not required to be present for every comparison under study. "Network meta-analysis" is an inclusive term that incorporates the scenarios of both indirect and mixed treatment comparisons.

*Network geometry evaluation:* The description of characteristics of the network of interventions, which may include use of numerical summary statistics. This does not involve quantitative synthesis to compare treatments. This evaluation describes the current evidence available for the competing interventions to identify gaps and potential bias. Network geometry is described further in **Appendix Box 4**.

### **Appendix Box 1. The Assumption of Transitivity for Network Meta-Analysis**

Methods for indirect treatment comparisons and network meta-analysis enable learning about the relative treatment effects of, for example, treatments A and B through use of studies where these interventions are compared against a common therapy, C.

When planning a network meta-analysis, it is important to assess patient and study characteristics across the studies that compare pairs of treatments. These characteristics are commonly referred to as *effect modifiers* and include traits such as average patient age, gender distribution, disease severity, and a wide range of other plausible features.

For network meta-analysis to produce valid results, it is important that the distribution of effect modifiers is similar, for example, across studies of A versus B and A versus C. This balance increases the plausibility of reliable findings from an indirect comparison of B versus C through the common comparator A. When this balance is present, the assumption of transitivity can be judged to hold.

Authors of network meta-analyses should present systematic (and even tabulated) information regarding patient and study characteristics whenever available. This information helps readers to empirically evaluate the validity of the assumption of transitivity by reviewing the distribution of potential effect modifiers across trials.

review only

## **Appendix Box 2. Differences in Approach to Fitting Network Meta-Analyses**

Network meta-analysis can be performed within either a frequentist or a Bayesian framework. Frequentist and Bayesian approaches to statistics differ in their definitions of probability. Thus far, the majority of published network meta-analyses have used a Bayesian approach.

Bayesian analyses return the posterior probability distribution of all the model parameters given the data and prior beliefs (e.g., from external information) about the values of the parameters. They fully encapsulate the uncertainty in the parameter of interest and thus can make direct probability statements about these parameters (e.g., the probability that one intervention is superior to another).

Frequentist analyses calculate the probability that the observed data would have occurred under their sampling distribution for hypothesized values of the parameters. This approach to parameter estimation is more indirect than the Bayesian approach.

Bayesian methods have been criticized for their perceived complexity and the potential for subjectivity to be introduced by choice of a prior distribution that may affect study findings. Others argue that explicit use of a prior distribution makes transparent how individuals can interpret the same data differently. Despite these challenges, Bayesian methods offer considerable flexibility for statistical modeling. In-depth introductions to Bayesian methods and discussion of these and other issues can be found elsewhere.

Review only

### **Appendix Box 3. Network Meta-Analysis and Assessment of Consistency**

Network meta-analysis often involves the combination of direct and indirect evidence. In the simplest case, we wish to compare treatments A and B and have 2 sources of information: direct evidence via studies comparing A versus B, and indirect evidence via groups of studies comparing A and B with a common intervention, C. Together, this evidence forms a closed loop, ABC.

Direct and indirect evidence for a comparison of interventions should be combined only when their findings are similar in magnitude and interpretation. For example, for a comparison of mortality rates between A and B, an odds ratio determined from studies of A versus B should be similar to the odds ratio comparing A versus B estimated indirectly based on studies of A versus C and B versus C. This assumption of comparability of direct and indirect evidence is referred to as *consistency* of treatment effects.

When a treatment network contains a closed loop of interventions, it is possible to examine statistically whether there is agreement between the direct and indirect estimates of intervention effect.

Different methods to evaluate potential differences in relative treatment effects estimated by direct and indirect comparisons are grouped as *local approaches* and *global approaches*. Local approaches (e.g., the Bucher method or the node-splitting method) assess the presence of inconsistency for a particular pairwise comparison in the network, whereas global approaches (e.g., inconsistency models,  $I^2$  measure for inconsistency) consider the potential for inconsistency in the network as a whole.

Tests for inconsistency can have limited power to detect a true difference between direct and indirect evidence. When multiple loops are being tested for inconsistency, one or a few may show inconsistency simply by chance. Further discussions of consistency and related concepts are available elsewhere.

Inconsistency in a treatment network can indicate lack of transitivity (see **Appendix Box 1**).

#### **Appendix Box 4. Network Geometry and Considerations for Bias**

The term *network geometry* is used to refer to the architecture of the treatment comparisons that have been made for the condition under study. This includes what treatments are involved in the comparisons in a network, in what abundance they are present, the respective numbers of patients randomly assigned to each treatment, and whether particular treatments and comparisons may have been preferred or avoided.

Networks may take on different shapes. Poorly connected networks depend extensively on indirect comparisons. Meta-analyses of such networks may be less reliable than those from networks where most treatments have been compared against each other.

Qualitative description of network geometry should be provided and accompanied by a network graph. Quantitative metrics assessing features of network geometry, such as *diversity* (related to the number of treatments assessed and the balance of evidence among them), *co-occurrence* (related to whether comparisons between certain treatments are more or less common), and *homophily* (related to the extent of comparisons between treatments in the same class versus competing classes), can also be mentioned.

Although common, established steps for reviewing network geometry do not yet exist, however examples of in-depth evaluations have been described related to treatments for tropical diseases and basal cell carcinoma and may be of interest to readers. An example based on 75 trials of treatments for pulmonary arterial hypertension (**Appendix Figure 3**) suggests that head-to-head studies of active therapies may prove useful to further strengthen confidence in interpretation of summary estimates of treatment comparisons.



### **Appendix Box 5. Probabilities and Rankings in Network Meta-Analysis**

Systematic reviews incorporating network meta-analyses can provide information about the hierarchy of competing interventions in terms of treatment rankings.

The term *treatment ranking probabilities* refers to the probabilities estimated for each treatment in a network of achieving a particular placement in an ordering of treatment effects from best to worst. A network of 10 treatments provides a total of 100 ranking probabilities—that is, for each intervention, the chance of being ranked first, second, third, fourth, fifth, and so forth).

Several techniques are feasible to summarize relative rankings, and include graphical tools as well as different approaches for estimating ranking probabilities. **Appendix Figure 6** shows 2 approaches to presenting such information, on the basis of a comparison of adjuvant interventions for resected pancreatic adenocarcinoma.

Robust reporting of rankings also includes specifying median ranks with uncertainty intervals, cumulative probability curves, and the surface under the cumulative ranking (SUCRA) curve.

Rankings can be reported along with corresponding estimates of pairwise comparisons between interventions. Rankings should be reported with probability estimates to minimize misinterpretation from focusing too much on the most likely rank.

Rankings may exaggerate small differences in relative effects, especially if they are based on limited information. An objective assessment of the strength of information in the network and the magnitude of absolute benefits should accompany rankings to minimize potential biases.

1  
2  
3  
4  
5  
6  
7  
8  
9  
10  
11  
12  
13  
14  
15  
16  
17  
18  
19  
20  
21  
22  
23  
24  
25  
26  
27  
28  
29  
30  
31  
32  
33  
34  
35  
36  
37  
38  
39  
40  
41  
42  
43  
44  
45  
46  
47  
48  
49  
50  
51  
52  
53  
54  
55  
56  
57  
58  
59  
60

**Appendix Figure 1A-1C**

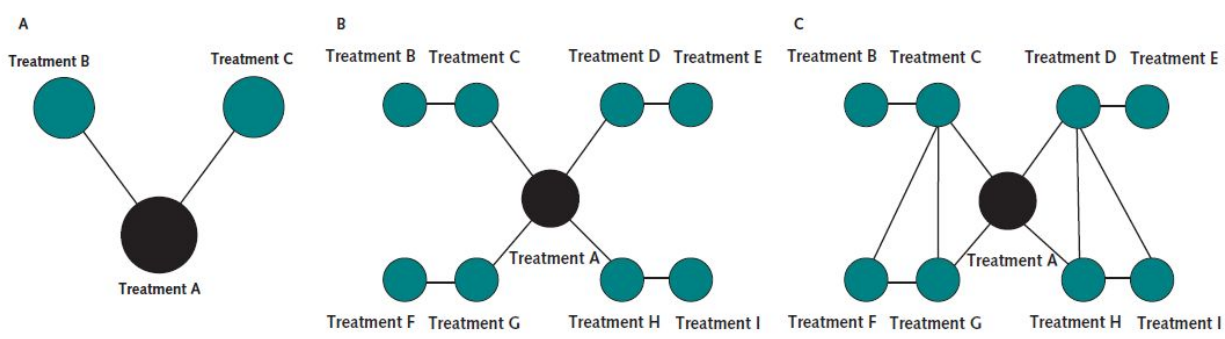

**Appendix Figure 3**

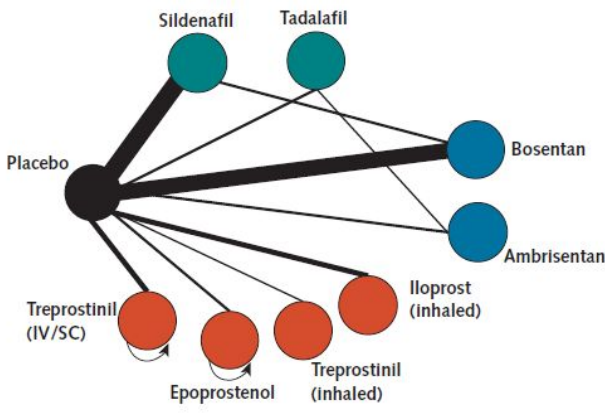

**Appendix Figure 6**

| Ranking | Treatment and Coresponding Ranking Probabilities<br>Grade 3 or 4 Hematologic Toxicity |             |                          |                                 |
|---------|---------------------------------------------------------------------------------------|-------------|--------------------------|---------------------------------|
|         | 5-FU                                                                                  | Gemcitabine | Chemoradiation<br>+ 5-FU | Chemoradiation<br>+ gemcitabine |
| 1       | 0.42                                                                                  | 0.42        | 0.15                     | 0.01                            |
| 2       | 0.46                                                                                  | 0.36        | 0.15                     | 0.02                            |
| 3       | 0.10                                                                                  | 0.17        | 0.68                     | 0.04                            |
| 4       | 0.02                                                                                  | 0.05        | 0.02                     | 0.93                            |

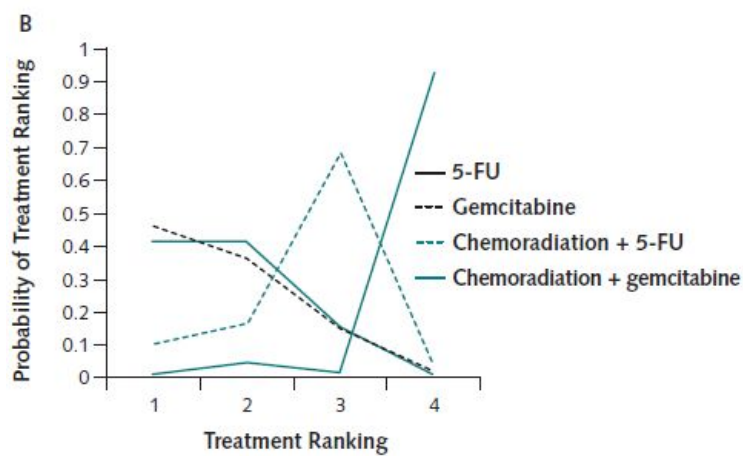

**PRISMA-P (Preferred Reporting Items for Systematic review and Meta-Analysis Protocols) 2015 checklist: recommended items to address in a systematic review protocol\***

| Section and topic                 | Item No | Checklist item                                                                                                                                                                                                                | Page         |
|-----------------------------------|---------|-------------------------------------------------------------------------------------------------------------------------------------------------------------------------------------------------------------------------------|--------------|
| <b>ADMINISTRATIVE INFORMATION</b> |         |                                                                                                                                                                                                                               |              |
| Title:                            |         |                                                                                                                                                                                                                               |              |
| Identification                    | 1a      | Identify the report as a protocol of a systematic review                                                                                                                                                                      | 1            |
| Update                            | 1b      | If the protocol is for an update of a previous systematic review, identify as such                                                                                                                                            | N/A          |
| Registration                      | 2       | If registered, provide the name of the registry (such as PROSPERO) and registration number                                                                                                                                    | 2, 7         |
| Authors:                          |         |                                                                                                                                                                                                                               |              |
| Contact                           | 3a      | Provide name, institutional affiliation, e-mail address of all protocol authors; provide physical mailing address of corresponding author                                                                                     | 1            |
| Contributions                     | 3b      | Describe contributions of protocol authors and identify the guarantor of the review                                                                                                                                           | 20           |
| Amendments                        | 4       | If the protocol represents an amendment of a previously completed or published protocol, identify as such and list changes; otherwise, state plan for documenting important protocol amendments                               | Cover letter |
| Support:                          |         |                                                                                                                                                                                                                               |              |
| Sources                           | 5a      | Indicate sources of financial or other support for the review                                                                                                                                                                 | 1, 20        |
| Sponsor                           | 5b      | Provide name for the review funder and/or sponsor                                                                                                                                                                             |              |
| Role of sponsor or funder         | 5c      | Describe roles of funder(s), sponsor(s), and/or institution(s), if any, in developing the protocol                                                                                                                            |              |
| <b>INTRODUCTION</b>               |         |                                                                                                                                                                                                                               |              |
| Rationale                         | 6       | Describe the rationale for the review in the context of what is already known                                                                                                                                                 | 4-7          |
| Objectives                        | 7       | Provide an explicit statement of the question(s) the review will address with reference to participants, interventions, comparators, and outcomes (PICO)                                                                      | 6            |
| <b>METHODS</b>                    |         |                                                                                                                                                                                                                               |              |
| Eligibility criteria              | 8       | Specify the study characteristics (such as PICO, study design, setting, time frame) and report characteristics (such as years considered, language, publication status) to be used as criteria for eligibility for the review | 7-9          |
| Information sources               | 9       | Describe all intended information sources (such as electronic databases, contact with study authors, trial registers or other grey literature sources) with planned dates of coverage                                         | 10           |
| Search strategy                   | 10      | Present draft of search strategy to be used for at least one electronic database, including planned limits, such that it could be repeated                                                                                    | Appendix A   |
| Study records:                    |         |                                                                                                                                                                                                                               |              |

|                                    |     |                                                                                                                                                                                                                                                  |       |
|------------------------------------|-----|--------------------------------------------------------------------------------------------------------------------------------------------------------------------------------------------------------------------------------------------------|-------|
| Data management                    | 11a | Describe the mechanism(s) that will be used to manage records and data throughout the review                                                                                                                                                     | 10    |
| Selection process                  | 11b | State the process that will be used for selecting studies (such as two independent reviewers) through each phase of the review (that is, screening, eligibility and inclusion in meta-analysis)                                                  | 10    |
| Data collection process            | 11c | Describe planned method of extracting data from reports (such as piloting forms, done independently, in duplicate), any processes for obtaining and confirming data from investigators                                                           | 10    |
| Data items                         | 12  | List and define all variables for which data will be sought (such as PICO items, funding sources), any pre-planned data assumptions and simplifications                                                                                          | 10-12 |
| Outcomes and prioritization        | 13  | List and define all outcomes for which data will be sought, including prioritization of main and additional outcomes, with rationale                                                                                                             | 9     |
| Risk of bias in individual studies | 14  | Describe anticipated methods for assessing risk of bias of individual studies, including whether this will be done at the outcome or study level, or both; state how this information will be used in data synthesis                             | 15    |
| Data synthesis                     | 15a | Describe criteria under which study data will be quantitatively synthesised                                                                                                                                                                      | 15-16 |
|                                    | 15b | If data are appropriate for quantitative synthesis, describe planned summary measures, methods of handling data and methods of combining data from studies, including any planned exploration of consistency (such as $I^2$ , Kendall's $\tau$ ) | 18    |
|                                    | 15c | Describe any proposed additional analyses (such as sensitivity or subgroup analyses, meta-regression)                                                                                                                                            |       |
|                                    | 15d | If quantitative synthesis is not appropriate, describe the type of summary planned                                                                                                                                                               | 17    |
| Meta-bias(es)                      | 16  | Specify any planned assessment of meta-bias(es) (such as publication bias across studies, selective reporting within studies)                                                                                                                    | 18    |
| Confidence in cumulative evidence  | 17  | Describe how the strength of the body of evidence will be assessed (such as GRADE)                                                                                                                                                               | 18    |

**\* It is strongly recommended that this checklist be read in conjunction with the PRISMA-P Explanation and Elaboration (cite when available) for important clarification on the items. Amendments to a review protocol should be tracked and dated. The copyright for PRISMA-P (including checklist) is held by the PRISMA-P Group and is distributed under a Creative Commons Attribution Licence 4.0.**

*From: Shamseer L, Moher D, Clarke M, Ghersi D, Liberati A, Petticrew M, Shekelle P, Stewart L, PRISMA-P Group. Preferred reporting items for systematic review and meta-analysis protocols (PRISMA-P) 2015: elaboration and explanation. BMJ. 2015 Jan 2;349(jan02 1):g7647.*

# BMJ Open

## Psychological interventions for chronic non-specific low back pain: protocol of a systematic review with network meta-analysis

|                                 |                                                                                                                                                                                                                                                                                                                                                                                                                                                                                                                                                                                                                                                                                                                             |
|---------------------------------|-----------------------------------------------------------------------------------------------------------------------------------------------------------------------------------------------------------------------------------------------------------------------------------------------------------------------------------------------------------------------------------------------------------------------------------------------------------------------------------------------------------------------------------------------------------------------------------------------------------------------------------------------------------------------------------------------------------------------------|
| Journal:                        | <i>BMJ Open</i>                                                                                                                                                                                                                                                                                                                                                                                                                                                                                                                                                                                                                                                                                                             |
| Manuscript ID                   | bmjopen-2019-034996.R2                                                                                                                                                                                                                                                                                                                                                                                                                                                                                                                                                                                                                                                                                                      |
| Article Type:                   | Protocol                                                                                                                                                                                                                                                                                                                                                                                                                                                                                                                                                                                                                                                                                                                    |
| Date Submitted by the Author:   | 12-Jun-2020                                                                                                                                                                                                                                                                                                                                                                                                                                                                                                                                                                                                                                                                                                                 |
| Complete List of Authors:       | Ho, Emma; The University of Sydney, Faculty of Medicine and Health<br>Ferreira, Manuela; University of Sydney Institute of Bone and Joint Research,<br>Chen, Lingxiao; The University of Sydney Institute of Bone and Joint Research,<br>Simic, Milena; The University of Sydney, Faculty of Medicine and Health<br>Ashton-James, Claire; The University of Sydney, Pain Management Research Institute, Faculty of Medicine and Health<br>Comachio, Josielli ; University of Sao Paulo, Department of Speech, Physical Therapy and Occupational Therapy, School of Medicine<br>Hayden, Jill; Dalhousie University, Community Health & Epidemiology<br>Ferreira, Paulo; University of Sydney, Faculty of Medicine and Health |
| <b>Primary Subject Heading</b>: | Public health                                                                                                                                                                                                                                                                                                                                                                                                                                                                                                                                                                                                                                                                                                               |
| Secondary Subject Heading:      | Mental health                                                                                                                                                                                                                                                                                                                                                                                                                                                                                                                                                                                                                                                                                                               |
| Keywords:                       | Back pain < ORTHOPAEDIC & TRAUMA SURGERY, Musculoskeletal disorders < ORTHOPAEDIC & TRAUMA SURGERY, PSYCHIATRY                                                                                                                                                                                                                                                                                                                                                                                                                                                                                                                                                                                                              |
|                                 |                                                                                                                                                                                                                                                                                                                                                                                                                                                                                                                                                                                                                                                                                                                             |

SCHOLARONE™  
Manuscripts



I, the Submitting Author has the right to grant and does grant on behalf of all authors of the Work (as defined in the below author licence), an exclusive licence and/or a non-exclusive licence for contributions from authors who are: i) UK Crown employees; ii) where BMJ has agreed a CC-BY licence shall apply, and/or iii) in accordance with the terms applicable for US Federal Government officers or employees acting as part of their official duties; on a worldwide, perpetual, irrevocable, royalty-free basis to BMJ Publishing Group Ltd ("BMJ") its licensees and where the relevant Journal is co-owned by BMJ to the co-owners of the Journal, to publish the Work in this journal and any other BMJ products and to exploit all rights, as set out in our [licence](#).

The Submitting Author accepts and understands that any supply made under these terms is made by BMJ to the Submitting Author unless you are acting as an employee on behalf of your employer or a postgraduate student of an affiliated institution which is paying any applicable article publishing charge ("APC") for Open Access articles. Where the Submitting Author wishes to make the Work available on an Open Access basis (and intends to pay the relevant APC), the terms of reuse of such Open Access shall be governed by a Creative Commons licence – details of these licences and which [Creative Commons](#) licence will apply to this Work are set out in our licence referred to above.

Other than as permitted in any relevant BMJ Author's Self Archiving Policies, I confirm this Work has not been accepted for publication elsewhere, is not being considered for publication elsewhere and does not duplicate material already published. I confirm all authors consent to publication of this Work and authorise the granting of this licence.

1  
2  
3 **Psychological interventions for chronic non-specific low back pain: protocol of a**  
4 **systematic review with network meta-analysis.**  
5  
6  
7  
8

9 Emma Kwan-Yee Ho<sup>a</sup>, Manuela Loureiro Ferreira<sup>b</sup>, Lingxiao Chen<sup>b</sup>, Milena Simic<sup>a</sup>, Claire  
10 Ashton-James<sup>c</sup>, Josielli Comachio<sup>d</sup>, Jill Alison Hayden<sup>e</sup>, Paulo Henrique Ferreira<sup>a</sup>  
11

12 <sup>a</sup>The University of Sydney, Faculty of Medicine and Health, Sydney, NSW, Australia.  
13

14 <sup>b</sup>The University of Sydney, Institute of Bone and Joint Research, Northern Clinical School,  
15 Faculty of Medicine and Health, Sydney, NSW, Australia.  
16

17 <sup>c</sup>The University of Sydney, Pain Management Research Institute, Faculty of Medicine and  
18 Health, Sydney, NSW, Australia.  
19

20 <sup>d</sup>Department of Speech, Physical Therapy and Occupational Therapy, School of Medicine,  
21 University of Sao Paulo, Sao Paulo, Brazil.  
22

23 <sup>e</sup>Department of Community Health & Epidemiology, Dalhousie University, Halifax, Nova  
24 Scotia, Canada.  
25  
26  
27  
28

29 **Address for Correspondence:**

30 Ms. Emma Kwan-Yee Ho, Faculty of Medicine and Health  
31 University of Sydney, PO Box 170 Lidcombe 1825 AUSTRALIA  
32  
33 Tel: +61 434 596 855  
34  
35 E-mail: emma.ho@sydney.edu.au  
36  
37  
38  
39

40 **Word count:** 5621  
41  
42  
43

44 **Funding Sources:** This research received no specific grant from any funding agency in the  
45 public, commercial or not-for-profit sectors.  
46  
47  
48

49 **Conflict of Interest:**

50 None declared.  
51  
52  
53  
54  
55  
56  
57  
58  
59  
60



## ABSTRACT

**Introduction:** Psychological factors such as fear avoidance beliefs, depression, anxiety, catastrophic thinking, and familial and social stress, have been associated with high disability levels in people with chronic low back pain (LBP). Guidelines endorse the integration of psychological interventions in the management of chronic LBP. However, uncertainty surrounds the comparative effectiveness of different psychological approaches. Network meta-analysis (NMA) allows comparison and ranking of numerous competing interventions for a given outcome of interest. Therefore, we will perform a systematic review with a NMA to determine which type of psychological intervention is most effective for adults with chronic non-specific LBP.

**Methods and analysis:** We will search electronic databases (MEDLINE, EMBASE, PsycINFO, Cochrane Central Register of Controlled Trials, Web of Science, SCOPUS and CINAHL) from inception until 22 August 2019 for randomised controlled trials comparing psychological interventions to any comparison interventions in adults with chronic non-specific LBP. There will be no restriction on language. The primary outcomes will include physical function and pain intensity, and secondary outcomes will include health-related quality of life, fear avoidance, intervention compliance and safety. Risk of bias will be assessed using the Revised Cochrane risk-of-bias tool for randomized trials (RoB 2) tool and confidence in the evidence will be assessed using the Confidence in NMA (CINeMA) framework. We will conduct a random-effects NMA using a frequentist approach to estimate relative effects for all comparisons between treatments and rank treatments according to the mean rank and surface under the cumulative ranking curve values. All analyses will be performed in Stata.

**Ethics and dissemination:** No ethical approval is required. The research will be published in a peer-reviewed journal.

**PROSPERO registration number:** CRD42019138074

**Key Words:** back pain, low back pain, musculoskeletal disorders, chronic, psychological, psychiatry, network meta-analysis, systematic review.

### Strengths and limitations of this study

- This is the first systematic review using an NMA design to simultaneously compare different types of psychological interventions for improving physical function, pain intensity, health-related quality of life, fear avoidance and intervention compliance, and assess their safety, in people with chronic non-specific LBP.
- The main strength is the NMA design will allow for the comprehensive comparison and ranking of multiple psychological interventions simultaneously, which was not possible with previous systematic reviews that only conducted pair-wise meta-analyses.
- An additional strength is that in comparison to previous pair-wise systematic reviews, the NMA design will allow for the inclusion and synthesis of a larger number of studies investigating a wider range of psychological interventions.
- The main limitation is that we anticipate numerous studies involving different combinations of psychological approaches (e.g. cognitive behavioural therapy plus pain education, counselling-based therapies plus pain education), but small number of eligible studies per combination, hence we will lump combination interventions into one treatment node for practical reasons.

1  
2  
3 **Psychological interventions for chronic non-specific low back pain: protocol of a**  
4 **systematic review with network meta-analysis.**  
5  
6

7 Low back pain (LBP) is one of largest contributors to disability worldwide[1, 2] and is  
8 associated with substantial health and economic burden relating to increased health-care  
9 utilisation costs, work absenteeism and productivity loss.[3] The challenge associated with  
10 treating chronic non-specific LBP lies in the complex multifactorial interaction between  
11 genetic, biophysical, psychosocial, health and lifestyle factors which are largely  
12 individualistic.[4, 5] Particularly, psychological factors such as fear avoidance beliefs,  
13 depression, anxiety, catastrophic thinking, and familial and social stress[4] are often poorly  
14 identified and inadequately addressed,[6] and have been shown to alter pain processing  
15 pathways, perceptions, and coping responses.[5, 7] The influence of these factors in chronic  
16 non-specific LBP have been found to increase the risk of disability,[8, 9] which commonly  
17 manifests as reduced functional capacity, avoidance of usual activities including work, and  
18 impaired societal and recreational participation.[5, 10]  
19  
20  
21  
22  
23  
24  
25  
26  
27  
28  
29

30 Psychological interventions in chronic pain conditions aim to reduce pain-related distress and  
31 disability by changing negative beliefs, behaviours and attitudes through a combination of  
32 principles and strategies informed by psychological theories. Psychological interventions  
33 commonly focus on targeting the specific environmental contingencies and maladaptive  
34 cognitive and emotional processes underpinning pain in order to promote self-efficacy and  
35 increased function.[11, 12] In clinical trials of psychological interventions for chronic LBP,  
36 psychological interventions are delivered either in isolation[12, 13] or as part of an integrated  
37 treatment program that may involve non-psychological co-interventions such as exercise,  
38 passive treatment or physiotherapy.[14-16] For the purposes of this review, we have defined  
39 five main categories of psychological interventions relevant to LBP: behavioural therapies,  
40 cognitive behavioural therapies, mindfulness-based therapies, counselling-based therapies, and  
41 pain education-focused therapies. These categories reflect the three “waves” of how  
42 psychological interventions have evolved over time.[17] Behavioural therapies are typically  
43 considered “first wave” approaches,[17] and include interventions focused on altering  
44 maladaptive behaviours, and dysfunctional sensations or movements.[18] Cognitive  
45 behavioural therapies are considered “second wave” approaches,[17] and include interventions  
46 that aim to modify harmful cognitions (e.g. thoughts, beliefs) which may proliferate pain and  
47 disability.[18] Mindfulness-based therapies, counselling-based therapies and pain education-  
48  
49  
50  
51  
52  
53  
54  
55  
56  
57  
58  
59  
60

focused therapies represent different types of ‘third wave’ approaches.[17] Unlike behavioural and cognitive behavioural therapies which focus on targeting psychological and emotional symptoms, ‘third wave’ therapies adopt a more holistic approach to promoting health and wellness.[17] Key characteristics and examples of the psychological intervention categories that will be included in our review are summarised below in Table 1.

**Table 1. Categories of Psychological Interventions for Low Back Pain**

|             | <b>Category</b>                  | <b>Characteristics</b>                                                                                                                                                                                                                                                                                        | <b>Examples</b>                                                                     |
|-------------|----------------------------------|---------------------------------------------------------------------------------------------------------------------------------------------------------------------------------------------------------------------------------------------------------------------------------------------------------------|-------------------------------------------------------------------------------------|
| First wave  | Behavioural therapies            | Behavioural therapies focus on the removal of positive reinforcement of pain behaviours and teach patients to overcome stressful situations through relaxation skills.[17]                                                                                                                                    | Biofeedback[17, 18]                                                                 |
| Second wave | Cognitive behavioural therapies  | Cognitive behavioural therapies aim to restructure negative cognitions (e.g. thoughts, beliefs) and behaviours and promote emotion regulation and problem-solving capacity.[17]                                                                                                                               | Graded activity[17]<br>Graded exposure[17]                                          |
| Third wave  | Mindfulness-based therapies      | Mindfulness-based therapies focus on promoting self-awareness, attention control, and pain acceptance.[13, 19]                                                                                                                                                                                                | Mindfulness-based stress reduction[17, 19]<br>Acceptance and commitment therapy[17] |
|             | Counselling-based therapies      | Counselling-based therapies focus on using supportive communication and active listening techniques to build interpersonal clinician-patient relationships.                                                                                                                                                   | Health coaching[20, 21]<br>Motivational interviewing[20, 21]                        |
|             | Pain education-focused therapies | Pain education-focused therapies target a patient’s understanding and knowledge of pain to reduce fear associated with LBP. Pain education interventions move away from the traditional biomechanical explanation of pathology and pain, and instead focus on the reconceptualisation of the pain experience. | Pain neuroscience education[22]                                                     |

1  
2  
3 Some pain education interventions specifically  
4 aim to desensitise the nervous system.  
5  
6

---

7  
8 Previous systematic reviews have shown promising evidence that psychological interventions  
9 can improve overall functioning, pain experience, depression, cognitive appraisal, health-  
10 related quality of life and decreased health care utilisation in people with chronic LBP.[11, 12,  
11 15] Psychological interventions can also reduce fear avoidance beliefs and behaviours (e.g.  
12 kinesiophobia),[23] which are associated with increased disability and pain in people with  
13 chronic LBP.[24, 25] Based on the evidence and LBP research experts, international clinical  
14 guidelines consistently endorse the integration of psychological interventions with exercise in  
15 the management of chronic LBP.[26-31]  
16  
17

18  
19 However, LBP guideline recommendations remain vague regarding the specific types of  
20 psychological approaches that clinicians should consider incorporating into treatment.[26-31]  
21 This may be due to the fact that previous systematic reviews, which have informed these  
22 guidelines, have mainly focused on a small selection of available approaches – namely  
23 cognitive behavioural therapy and behavioural approaches such as biofeedback.[11, 12, 15, 18,  
24 32, 33] Emerging psychological interventions such as cognitive functional therapy (a  
25 combination of psychological approaches involving cognitive behavioural strategies, pain  
26 education and exercise)[5] and acceptance and commitment therapy have been neglected from  
27 these reviews, despite recent evidence for their effectiveness in reducing LBP-related  
28 disability.[34, 35] Importantly, previous reviews have only conducted multiple independent  
29 pairwise meta-analyses, and to our knowledge, no attempts have been made to synthesise the  
30 separate results. Ultimately, the comparative effectiveness of the wider collection of  
31 psychological interventions available for managing chronic LBP is unknown and clinical  
32 guidelines remain unclear. This represents an important gap in the evidence. Subsequently,  
33 there is an increased reliance on a clinician's expertise to select the most appropriate  
34 psychological approach for people with chronic LBP. Given that clinicians such as  
35 physiotherapists report a perceived lack of training and confidence in addressing psychological  
36 factors,[36-38] and tend to be biased towards a biomedical approach despite increasing efforts  
37 to adopt a biopsychosocial, person-centered approach,[38, 39] the gap in evidence must be  
38 addressed. A network meta-analysis (NMA) design will allow us to determine the comparative  
39 effectiveness of psychological interventions for managing chronic LBP, whilst addressing the  
40 limitations identified from previous reviews.  
41  
42  
43  
44  
45  
46  
47  
48  
49  
50  
51  
52  
53  
54  
55  
56  
57  
58  
59  
60

1  
2  
3  
4  
5 A NMA is an extension of a traditional pairwise meta-analysis and involves the synthesis of  
6 direct and indirect evidence to simultaneously compare numerous competing interventions  
7 within a single, coherent treatment network.[40] Direct evidence refers to data obtained from  
8 studies directly comparing competing interventions in head-to-head trials. Direct evidence can  
9 be used to indirectly estimate the effect of interventions that have not been previously  
10 compared in head-to-head trials but have been compared to a common comparator (indirect  
11 evidence). Integrating direct and indirect evidence increases the precision of treatment effect  
12 estimates, provided that the assumptions of transitivity (balanced distribution of potential effect  
13 modifiers across all comparisons within a network)[41-43] and consistency (statistical  
14 agreement between direct and indirect evidence for each comparison)[43, 44] are satisfied.  
15 Treatment effect estimates are used to generate relative treatment rankings to rank all the  
16 competing interventions for a particular outcome measure. As such, the current research aims  
17 to perform a NMA to investigate the comparative effectiveness and safety of psychological  
18 interventions for chronic LBP and determine which specific type is most effective for  
19 improving physical function, pain intensity, health-related quality of life, fear avoidance and  
20 intervention compliance in chronic non-specific LBP.  
21  
22  
23  
24  
25  
26  
27  
28  
29  
30  
31  
32  
33

## 34 **METHODS AND ANALYSIS**

### 35 **Study design**

36 This protocol was written in accordance with the Preferred Reporting Items for Systematic  
37 Reviews and Meta-Analyses (PRISMA) statement for systematic reviews[45] and the PRISMA  
38 extension for developing review protocols (PRISMA-P)[46] and for NMA (PRISMA-  
39 NMA).[47] The systematic review protocol has been registered with the International  
40 Prospective Register of Systematic Reviews (PROSPERO): CRD42019138074.  
41  
42  
43  
44  
45  
46  
47

### 48 **Eligibility criteria**

#### 49 **Types of studies**

50 We will include published parallel and cluster randomised controlled trials (RCT). We will also  
51 include the first phase of cross-over RCTs. There will be no restriction on length of follow-up.  
52 Observational studies, non-randomised trials, short reports, research letters, conferences  
53 abstracts, or studies that have not been published as full-length articles in peer-reviewed  
54 scientific journals will be excluded. In accordance with the Cochrane handbook,[48] we will  
55 only include data from cluster RCTs which account for the cluster design (e.g. data analysed at  
56  
57  
58  
59  
60

1  
2  
3 the level of allocation). If cluster-level data is not reported for a given cluster RCT study, we  
4 will attempt to use the approximate approaches described in the Cochrane handbook to adjust  
5 the results,[48] otherwise the study will be excluded.  
6  
7  
8  
9

### 10 Types of participants

11 Eligible studies will include adults experiencing chronic non-specific LBP, with or without the  
12 presence of leg pain. Chronic non-specific LBP will be defined according to NICE UK  
13 guidelines as pain in the back between the bottom of the rib cage and buttocks crease with no  
14 known pathoanatomical cause, for greater than 12 weeks in duration.[26, 49] Studies including  
15 participants with serious pathologies (e.g. spinal stenosis, malignancy, trauma, vertebral  
16 fracture, infection, inflammatory disorders) will be excluded. We will include studies involving  
17 a combination of acute, sub-acute or chronic LBP populations, provided that >50% of  
18 participants have chronic LBP and the results are reported separately for chronic LBP  
19 populations. We will also include studies of chronic LBP participants combined with other  
20 chronic pain conditions, provided that >50% of participants have a single diagnosis of chronic  
21 LBP and the results are reported separately for chronic LBP populations. If it is unclear, study  
22 eligibility will be determined by consensus amongst reviewers.  
23  
24  
25  
26  
27  
28  
29  
30  
31  
32  
33

### 34 Types of interventions

35 We will include studies of psychological interventions. Expanding on the definition provided  
36 by Hoffman et al. (2007),[12] we will consider an intervention as “psychological” if it is  
37 conceived by the authors of the study as a psychological intervention, or if it is clearly based on  
38 any of the following approaches: cognitive behavioural therapeutic strategies [relaxation,  
39 graded exposure (desensitisation), imagery (distraction), goal setting, operant conditioning],  
40 mindfulness-based stress reduction, acceptance and commitment therapy, cognitive functional  
41 therapy, health-coaching, biofeedback (delivered with a therapeutic intent to promote muscle  
42 relaxation), pain education, and counselling directly employing principles of psychological  
43 theory. Interventions such as cognitive behavioural therapeutic strategies and biofeedback were  
44 purposely included based on their inclusion across a variety of previous relevant systematic  
45 reviews.[12, 15, 17, 18] Additional approaches such as cognitive functional therapy, health  
46 coaching, and acceptance and commitment therapy were included as they have been neglected  
47 in previous reviews. If our search identifies other psychological interventions which are not  
48 explicitly listed above but meet our definition for a psychological intervention, we will  
49  
50  
51  
52  
53  
54  
55  
56  
57  
58  
59  
60

1  
2  
3 consider including them in our review. Disagreements regarding their eligibility for inclusion  
4 will be resolved by consensus.  
5  
6  
7

8 We will include studies of combination therapies, defined as interventions that contain two or  
9 more psychological approaches delivered together, with or without additional non-  
10 psychological co-interventions. There will be no restriction on the non-psychological co-  
11 interventions or comparison interventions identified by our search strategy.  
12  
13  
14  
15

### 16 17 Types of outcome measures

18 The primary outcomes of interest are physical function and pain intensity:  
19

- 20 1. Physical function, defined as lower back specific physical function, measured at the end  
21 of treatment. Physical function is commonly measured by continuous, self-report scales  
22 (e.g. Oswestry Disability Index (ODI), Roland Morris Disability Questionnaire  
23 (RMDQ), Core Outcome Measures Index (COMI), Quebec Back Pain Disability Index  
24 (QBPDI)) or rating scales within a composite measure (e.g. 12-Item or 36-Item Short  
25 Form (SF-12, SF-36)). We will not exclude studies that use other measurement tools.  
26  
27 2. Pain intensity, measured at the time point closest to the end of treatment. Pain intensity  
28 is commonly measured by continuous, self-report scales (e.g. Numeric Rating Scale  
29 (NRS), Visual Analogue Scale (VAS)) or a rating scale within a composite rating scale  
30 (e.g. McGill Pain Questionnaire). We will not exclude studies that use other  
31 measurement tools.  
32  
33  
34  
35  
36  
37  
38  
39  
40

41 Secondary outcomes of interest include:

- 42 1. Health-related quality of life, measured at the end of treatment. It is commonly  
43 measured by the SF-12, SF-36, EuroQol five-dimension (EQ-5D), Nottingham Health  
44 Profile (NHP) and 10-Item Patient-Reported Outcomes Measurement Information  
45 System Global Health Short Form (PROMIS-GH-10). We will not exclude studies that  
46 use other measurement tools.  
47  
48 2. Fear avoidance, defined as fear of pain and consequent avoidance of movement,  
49 measured at the end of treatment. Fear avoidance is commonly measured by the Fear-  
50 Avoidance Beliefs Questionnaire (FABQ), Pain Catastrophizing Scale (PCS), Tampa  
51 Scale for Kinesiophobia (TSK) and Fear of Pain Questionnaire (FPQ). We will not  
52 exclude studies that use other measurement tools.  
53  
54  
55  
56  
57  
58  
59  
60



3. Intervention compliance, measured as the proportion of participants who complete their assigned intervention (psychological or comparison) during the intervention period.
4. Safety, defined as the proportion of participants who experience at least one adverse effect during the intervention period. Adverse effects will be broadly defined as any ‘adverse event,’ ‘side effect,’ ‘complication,’ or event resulting in discontinuation of treatment, associated with the intervention (psychological or comparison) under investigation.

## Study selection

### Electronic searches

The following databases will be searched for eligible studies via OVID from inception until 22 August 2019: MEDLINE, EMBASE, PsycINFO, Cochrane Central Register of Controlled Trials, Web of Science, SCOPUS and CINAHL. Search concepts will include language and keywords for: randomised controlled trial, low back pain, and terms relating to psychological interventions, according to the eligibility criteria defined earlier in the protocol. A full MEDLINE search strategy can be found in Appendix A of this protocol. There will be no restriction on language.

### Additional search strategies

We will search reference lists and perform citation tracking of included studies and relevant systematic reviews[11, 12, 15, 17, 18, 32, 33] and clinical guidelines[26-28] to identify additional eligible studies.

### Identification and selection of studies

Citations identified by our search strategy will be managed using Endnote X9[50] and screened using Covidence.[51] Eligibility screening will be conducted independently by two reviewers in two independent stages: (i) citation titles and abstracts; (ii) full text. Disagreements will be resolved by consensus or a third reviewer. A PRISMA flow-diagram will be presented to map the number of records included and excluded during the study selection process, with reasons for exclusions reported.

## Data extraction

1  
2  
3 Two reviewers will independently extract data from the included studies using a pre-designed  
4 Microsoft Excel data extraction form. We will pilot-test the form on a small number of articles.  
5  
6 Disagreements will be resolved by consensus or a third reviewer.  
7  
8  
9

#### 10 *Publication characteristics*

11 We will extract data on the following publication characteristics: first author, publication year,  
12 journal, funding, location.  
13  
14

#### 15 *Study design characteristics*

16 We will extract data related to the study design, including number of participants randomised  
17 and durations of follow-up.  
18  
19  
20  
21  
22

#### 23 *Participant characteristics*

24 We will extract data on the individual study sample, including age, male/female, body mass  
25 index, baseline pain intensity, socioeconomic status and comorbidities.  
26  
27  
28  
29

#### 30 *Interventions and Comparators*

31 We will extract data on the interventions of interest and any comparison interventions. We  
32 will extract the key components of the psychological intervention (e.g. details of the specific  
33 psychological principles or approaches used, qualifications of the personnel delivering the  
34 intervention, co-interventions involved) and comparison intervention. We will extract all  
35 available data on intervention dosage and frequency, and intervention duration including  
36 duration of any washout.  
37  
38  
39  
40  
41  
42  
43  
44

#### 45 *Outcomes*

46 We will extract the definitions provided for our primary and secondary outcomes of interest.  
47 We will also extract the type and dimensions of the measurement tools used to assess our  
48 primary and secondary outcomes of interest.  
49  
50  
51

#### 52 *Results*

53 For intervention compliance, we will extract the number of participants randomised to each  
54 intervention group (psychological or comparison), as well as the number of participants who  
55 complete their assigned intervention (i.e. provide data at the time-point closest to the end of  
56 treatment). If this data is not available, we will extract the number of participants in each group  
57  
58  
59  
60

1  
2  
3 who discontinued treatment for any reason (i.e. all-cause discontinuation) within the  
4 intervention period, to calculate the number of participants who completed their assigned  
5 intervention. We will express this data as a proportion of the total number of participants  
6 randomised to each group respectively. For studies comparing a psychological intervention to a  
7 non-intervention comparison (i.e. waitlist control, no intervention), we will assume that the  
8 intervention compliance for the non-intervention comparison is 100%.  
9  
10  
11  
12  
13  
14

15 For safety, we will extract all available data on adverse effects, broadly encompassing adverse  
16 and serious adverse events, side effects, complications, and all-cause discontinuation. We will  
17 extract authors' definitions and reasons for any adverse effects. We will also extract all  
18 available data, including authors' definitions, on alternative measures of safety reported in the  
19 included studies. We will extract the number of participants who experience at least one  
20 adverse effect related to the psychological or comparison intervention under investigation and  
21 express this as a proportion of the total number of participants randomised to each group  
22 respectively. We will also extract data on adherence if reported.  
23  
24  
25  
26  
27  
28  
29

30 For all other outcome measures, we will preference extracting the mean baseline and outcome  
31 scores (at the time point closest to end of treatment) for each group, and the accompanying  
32 measures of variance or statistics to impute these values. Otherwise, we will extract the change  
33 in outcome from baseline and the accompanying measures of variance for each group. If  
34 neither are available, we will extract between-group differences in scores and the  
35 accompanying measures of variance. For the following outcomes, we will extract all available  
36 data in the order which the measurement tools are listed, in accordance with the proposed  
37 hierarchy for analysis. If a given outcome is measured by several measurement tools not  
38 explicitly listed, the hierarchy for analysis will be decided by consensus from the reviewers.  
39  
40  
41  
42  
43  
44  
45  
46  
47

48 For studies measuring physical function: ODI; RMDQ; COMI; QBPQI; rating scale for  
49 disability from a composite measure of physical function (e.g. SF-12, SF-36); other  
50 measurement tools.[52, 53] For studies measuring pain intensity: NRS; 100mm VAS; 10cm  
51 VAS; rating scale for pain intensity from a composite measure of pain intensity; other  
52 measurement tools.[52, 53] We will extract data on pain intensity at the time point closest to  
53 randomisation and end of treatment, in the order of average pain intensity (preferred); worst  
54 pain intensity, alternative measures of pain intensity. If several alternative measures of pain  
55 intensity are reported, we will calculate an average score. For studies measuring health-related  
56  
57  
58  
59  
60

1  
2  
3 quality of life: PROMIS-GH-10; EQ-5D; SF-36 or SF-12 (physical component summary sub-  
4 score); SF-36 or SF-12 (mental component summary sub-score); SF-36 (overall score);  
5 NHP;[52, 53] rating scale from a composite measure of health-related quality of life; other  
6 measurement tools. If only an overall score for the SF-36 is provided, we will contact authors  
7 for the physical and mental component summary sub-scores. For studies measuring fear  
8 avoidance: FABQ (physical activity scale); FABQ (work scale); FABQ (overall score); PCS,  
9 TSK; FPQ; rating scales of fear avoidance from a composite measure of fear avoidance; other  
10 measurement tools.[54] If only an overall score for the FABQ is provided, we will contact  
11 authors for the physical activity and work sub-scores. Authors will be contacted for additional  
12 information where necessary.  
13  
14  
15  
16  
17  
18  
19  
20  
21

22 Data will be classified and assessed at the following time-points: (1) pre-intervention; (2) post-  
23 intervention (i.e. timepoint closest to end of treatment); (3) short-term treatment sustainability ( $\geq 2$   
24 months but  $< 6$  months post-intervention); (4) mid-term treatment sustainability ( $\geq 6$   
25 months but  $< 12$  months post-intervention); (5) long-term treatment sustainability ( $\geq 12$  months  
26 post-intervention), and NMA will be performed at each time-point separately.  
27  
28  
29  
30  
31  
32

### 33 **Network Treatment Nodes**

34 Using the framework proposed by Caldwell et al. (2016),[55] we will use a splitting approach  
35 to classify the psychological interventions. A splitting approach was chosen because  
36 psychological interventions are typically complex and heterogeneous in nature. For example,  
37 two separate trials involving cognitive behavioural therapy may focus on utilising different  
38 psychological principles or strategies and incorporate different additional co-interventions (e.g.  
39 exercise, passive therapies). Failing to adequately account for the variability, as best as  
40 possible, may potentially result in inaccurate estimates of treatment effects. In attempts to  
41 account for heterogeneity, we will first scrutinise intervention descriptions to classify the  
42 psychological interventions into 5 treatment nodes based on 5 key approaches (behavioural,  
43 cognitive behavioural, mindfulness-based, counselling-based and pain education). We will also  
44 form a separate treatment node using a lumping method to account for combination approaches  
45 (e.g. two or more psychological approaches delivered together). Then, we will further  
46 differentiate whether additional non-psychological co-interventions are involved, which will be  
47 sub-classified as exercise, passive treatments or physiotherapy. If present, the combination of  
48  
49  
50  
51  
52  
53  
54  
55  
56  
57  
58  
59  
60

1  
2  
3 the psychological approach with a non-psychological co-intervention will form a separate  
4 treatment node (e.g. cognitive behavioural therapy plus exercise).  
5  
6  
7

8 The following treatment nodes will be formed for the psychological interventions:  
9

- 10 • Behavioural therapies (e.g. relaxation-based interventions, biofeedback, operant  
11 conditioning), which we will consider as psychological approaches focused on  
12 facilitating the removal of positive reinforcement of pain behaviours and promoting  
13 health behaviours, in the absence of cognitive strategies;[17, 18]  
14
- 15 • Cognitive behavioural therapies, which we will consider as the combination of  
16 behavioural therapies with an additional focus of changing unhelpful cognitions (i.e.  
17 thoughts, beliefs and attitudes), and/or promoting emotion regulation and problem-  
18 solving;[17]  
19
- 20 • Mindfulness-based therapies, which we will consider as psychological approaches  
21 focused on practicing techniques such as meditation, non-judgemental attention control  
22 and awareness (e.g. mindfulness-based stress reduction, acceptance and commitment  
23 therapy);[19, 56]  
24
- 25 • Counselling-based therapies, which we will consider as psychological approaches  
26 focused on using supportive communication and active listening techniques to facilitate  
27 healthy behaviour change (e.g. health coaching, motivational interviewing);[20, 21]  
28
- 29 • Pain education, which we will consider as psychological approaches focused on  
30 improving understanding and knowledge about pain. These interventions may involve a  
31 biomechanical explanation of LBP, but are clearly focused on the reconceptualisation  
32 of beliefs about the pain experience;[57]  
33
- 34 • Combinations of psychological interventions (e.g. pain education combined with  
35 behavioural therapy), which we will consider as the delivery of two or more  
36 psychological approaches together, in the absence of a non-psychological co-  
37 intervention.  
38  
39  
40  
41  
42  
43  
44  
45  
46  
47  
48  
49  
50

51 Non-psychological co-interventions will be classified into the following treatment nodes:  
52

- 53 • Exercise, which we will define as interventions that formally prescribe a structured  
54 exercise program (e.g. consisting of aerobic, strengthening, stretching, stabilisation,  
55 motor control exercises) and/or direct instructions to increase physical activity levels;  
56  
57  
58  
59  
60

- Passive treatment, including but not limited to spinal manipulative therapy, massage, and electrotherapies;
- Physiotherapy, which we will define as interventions delivered by a physiotherapist, which may involve a combination of exercise and passive treatments.

Comparison interventions will be classified into the following treatment nodes:

- Exercise, defined above;
- Passive treatment, defined above;
- Physiotherapy, defined above;
- General practitioner care, which we will define as interventions considered as standard care provided by general practitioners;
- Advice, which we will consider as interventions providing general advice that is not psychologically-informed;
- No intervention (e.g. waitlist control, no intervention).

For comparison interventions described as “usual care” by study authors, we will scrutinise the authors’ descriptions of the intervention to classify them into the above treatment nodes.

Figure 1 represents all possible combinations of treatment nodes. Consensus will be sought regarding accurate classification of interventions prior to conducting statistical analyses.

### **Figure 1. Network plot of all theoretically possible network comparisons**

Prior to data analysis, we will consult clinical experts from the review team to establish the appropriateness of further lumping treatment nodes together if there are inadequate number of studies are available for a given treatment node (e.g. less than two studies available). Any post-hoc alternative network geometrics formed using this approach will be clearly identified and justified in the final review. A decision set and supplementary set will be formulated for the final review.

### **Risk of bias in the included studies**

Two reviewers will independently assess risk of bias in the included studies using the Revised Cochrane risk-of-bias tool for randomized trials (RoB 2).[58, 59] We will use the licensed Microsoft Excel tool to implement the RoB2. We will pilot-test the risk of bias assessment

1  
2  
3 procedure on a small number of articles. Authors will be contacted for additional information  
4 where necessary. The RoB 2 assesses five domains: (1) bias arising from the randomisation  
5 process; (2) bias due to deviations from intended interventions; (3) bias due to missing  
6 outcome data; (4) bias in measurement of the outcome; (5) bias in selection of the reported  
7 result. Each domain will be graded as low risk of bias, some concerns, or high risk of bias, and  
8 the results will be summarised in a table. For cluster RCTs, we will use the Cochrane cluster  
9 RCT variant of the RoB 2 tool, which assesses an additional domain: bias arising from  
10 identification or recruitment of individual participants within clusters.[60] An overall risk of  
11 bias judgement (low risk of bias, some concerns, or high risk of bias) will be made based on  
12 the five (or six) domain-level judgements, as described in Sterne et al. (2019).[58] Generally,  
13 the overall risk of bias judgement corresponds to the worst risk of bias in any of the five (or  
14 six) domains, however studies with multiple domains graded as ‘some concerns’ may be  
15 judged as high risk of overall bias.[58] Disagreements will be resolved through consensus or a  
16 third reviewer.

### 27 28 29 **Data Analysis**

30 Characteristics of the publications, study designs, study populations, interventions and  
31 comparators, and outcome measures will be summarised descriptively and presented in a table.  
32 Pair-wise meta-analysis and NMA will be performed in Stata[61] using the metan command  
33 (with Knapp–Hartung adjustment applied), and the network package[62-64] and network  
34 graphs package[65, 66] respectively.

### 35 36 37 38 39 40 41 **Measures of treatment effect**

42 For continuous outcomes that use the same rating scale across all studies, we will use mean  
43 differences (MD) and 95% confidence intervals (95% CI). If different rating scales are used for  
44 comparable outcomes, all continuous data for the given outcome will be converted to a  
45 common standardised 0-100 scale. If data is reported as dichotomous, we will use odds ratios  
46 (ORs) and 95% CI.

### 47 48 49 50 51 52 53 **Dealing with missing outcome data and missing statistics**

54 For continuous outcomes, we will impute missing data by converting standard errors, p-values  
55 or CI into standard deviations (SD).[48] If a study only reports the median or interquartile  
56 range (IRQ), SD will be calculated by dividing the IRQ by 1.35, and we will consider the  
57  
58  
59  
60

1  
2  
3 median to be equivalent to the mean. If relevant information is provided in figures, we will  
4 extract data from the graphs. If data cannot be obtained, we will attempt to contact authors.  
5  
6  
7

### 8 **Geometry of the network**

9  
10 The network diagram will be used to graphically depict the available evidence. Nodes will be  
11 used to represent the different interventions and comparators, and the weight of the edges will  
12 be used to visually represent the proportional number of studies comparing two connected  
13 nodes within the network.  
14  
15  
16  
17

### 18 **Pairwise meta-analysis**

19  
20 We will perform traditional pairwise meta-analyses of all direct comparisons for which there  
21 are at least two studies available. We will apply the khartung command to adjust for the  
22 Hartung-Knapp-Sidik-Jonkman (HKSJ) random-effects method, which has less error rates  
23 compared to the DerSimonian and Laird approach in particular across comparisons with greater  
24 heterogeneity and when the number of studies is small.[67] We will assume the heterogeneity  
25 variance for each pairwise comparison is different. We will use the Q statistic to test for  
26 statistical heterogeneity in pairwise comparisons. We will use  $\alpha < 0.10$  as we anticipate a  
27 few studies per comparison. We will calculate Higgins  $I^2$  statistic to indicate the proportion of  
28 variability in effect estimates due to heterogeneity and interpret  $I^2 > 50\%$  as suggesting  
29 substantial heterogeneity.[48] Forest plots will be created to graphically depict individual and  
30 pooled effect sizes. Narrative analysis will be performed if we are unable to impute missing  
31 data or cannot contact authors for data, inadequate number of studies are available for a given  
32 comparison (e.g.  $< 2$  studies), or there is substantial heterogeneity.  
33  
34  
35  
36  
37  
38  
39  
40  
41  
42  
43  
44

### 45 **Assessment of transitivity assumption**

46  
47 Transitivity implies the assumption that distribution of clinical and methodological variables  
48 that could potentially act as effect modifiers across available treatment comparisons is balanced  
49 within a network.[41-43, 68] Given the lack of conclusive evidence on treatment effect  
50 modifiers for LBP[69] or psychological interventions,[12, 70, 71] we will consider the  
51 following factors to be potential effect modifiers: age,[69] gender,[72] sample size,[73]  
52 baseline physical function, baseline pain intensity, baseline fear avoidance,[74] sciatica (leg  
53 pain with nerve root compromise). We anticipate that we will have difficulty assessing the  
54 distribution of effect modifiers, due to insufficient reporting the potential effect modifiers  
55 within individual studies and few studies available per pairwise comparison to make reasonable  
56  
57  
58  
59  
60



1  
2  
3 judgments.[75] To assess transitivity, we will use Stata to adjust the weight of the edges within  
4 the network plot, proportional to the baseline distribution of the pre-specified effect modifier,  
5 and visually inspect comparability within the network.[68] If minor intransitivity is suspected  
6 (i.e. minor or negligible dissimilarities in the distribution of a given effect modifier across  
7 comparisons based on clinical judgement), we will proceed with the NMA and perform  
8 network meta-regressions or sub-group analyses (or both) to explore the influence of suspected  
9 factors on the results. If the distribution of a given effect modifier is clearly dissimilar across  
10 comparisons, we will exclude network nodes. If intransitivity persists, we will consider not  
11 proceeding with NMA.  
12  
13  
14  
15  
16  
17  
18  
19  
20

### 21 **Network meta-analysis**

22 A NMA will be performed using a frequentist approach to simultaneously compare direct and  
23 indirect evidence. We will assume the heterogeneity variance across different comparisons  
24 within the NMA model will be the same.[76] We will use heterogeneity variances from the  
25 NMA model as an index of global network heterogeneity. Mean rank and relative treatment  
26 rankings will be estimated for each intervention node according to the surface under the  
27 cumulative ranking curve (SUCRA) values.  
28  
29  
30  
31  
32  
33

### 34 **Assesment of inconsistency**

35 Valid NMA results rely on the assumption of consistency, which describes statistical  
36 agreement between direct and indirect evidence for each comparison within a network.[43, 44]  
37 Global inconsistency of the entire network will be assessed using the design-by-treatment  
38 interaction model,[77] which is a goodness-of-fit test. The presence of inconsistency will be  
39 inferred based on  $p < 0.10$ . Local inconsistencies within closed loops will be assessed with the  
40 loop specific approach (Bucher method),[78] and by fitting side-splitting models.[62] The loop  
41 specific approach (Bucher method) will be implemented in Stata using the ifplot command. We  
42 will infer the presence of local inconsistencies using a threshold of  $p < 0.10$  for either approach.  
43 If inconsistencies are identified, we will first check for errors in data extraction. Then, we will  
44 examine the potential influence of the pre-specified effect modifiers within inconsistent loops  
45 using network meta-regression models or sub-group analyses, and conduct sensitivity analyses  
46 excluding studies that may be the source of inconsistency (e.g. high risk of bias, studies  
47 measuring physical function using the SF-12 or SF-36). If substantial inconsistency remains  
48 and the origin remains unexplained, we will consider not proceeding with NMA.  
49  
50  
51  
52  
53  
54  
55  
56  
57  
58  
59  
60

### Sensitivity and sub-group analysis

To examine robustness of results, we will conduct a sensitivity analysis by excluding studies with high risk of bias, provided that the original network structure remains the same. We will also perform a sensitivity analysis by excluding studies measuring physical function using the SF-12 or SF-36, which may be a potential source of heterogeneity, provided that sufficient data for physical function is available and the original network structure remains the same. We will also perform network meta-regressions or sub-group analyses on the following covariates, if sufficient data is available: age, gender, sample size, baseline physical function levels, baseline pain levels, baseline fear avoidance, sciatica (leg pain with nerve root compromise). We will assume that for each network meta-regression model, the regression co-efficient for each covariate will be the same across all comparisons in the network. We specify the following assumptions about the direction of effect for each covariate:

- Age (continuous): Increasing magnitudes of the covariate reduces the differences in effect sizes between the intervention and comparator (compared to trials in which the covariate is less).
- Gender (continuous): Gender will be summarised as the proportion (percentage) of males. Increasing magnitudes of the covariate reduces the differences in effect sizes between the intervention and comparator (compared to trials in which the covariate is less).
- Sample size (continuous): Increasing magnitudes of the covariate reduces the differences in effect sizes between the intervention and comparator (compared to trials in which the covariate is less).
- Baseline physical function (continuous): Increasing magnitudes of the covariate increases the differences in effect sizes between the intervention and comparator (compared to trials in which the covariate is less).
- Baseline pain intensity (continuous): Increasing magnitudes of the covariate reduces the differences in effect sizes between the intervention and comparator (compared to trials in which the covariate is less).
- Baseline fear avoidance (continuous): Increasing magnitudes of the covariate reduces the differences in effect sizes between the intervention and comparator (compared to trials in which the covariate is less).
- Sciatica (leg pain with nerve root compromise)(continuous): Presence of sciatica will be summarised as the proportion (percentage) of participants reporting sciatica at baseline.

1  
2  
3 Increasing magnitudes of the covariate reduces the differences in effect sizes between  
4 the intervention and comparator (compared to trials in which the covariate is less).  
5  
6  
7

8 Further, subject to the availability of data, we will attempt to perform meta-regressions to  
9 explore the effects of intervention parameters relating to dosage and/or frequency (e.g. total  
10 length (in weeks) of the intervention, total intended hours of the intervention during the  
11 intervention period). We make the following assumption about the direction of effect for  
12 intervention dosage and/or frequency (continuous): Increasing magnitudes of the covariate  
13 increases the differences in effect sizes between the intervention and comparator (compared to  
14 trials in which the covariate is less).  
15  
16  
17  
18  
19  
20  
21

22 We will also perform the following sub-group analyses, provided that sufficient data is  
23 available and the original network structure remains the same:

24 (1) Delivery format of psychological intervention (e.g. face-to-face, telephone-administered,  
25 web-based, self-help booklets), the hypothesis is that face-to-face delivery format will result in  
26 greater improvements in disability and pain intensity.  
27  
28  
29

30 (2) Individual versus group-based intervention delivery, the hypothesis is that group-based  
31 interventions will result in greater improvements in disability and pain intensity.  
32  
33  
34  
35

### 36 **Publication bias**

37 Publication bias in the NMA will be evaluated by visual inspection of comparison-adjusted  
38 funnel plots for asymmetry. As described above, meta-regression using sample size and effect  
39 estimates will be performed to detected small study effect.[79]  
40  
41  
42  
43  
44

### 45 **Confidence in cumulative evidence**

46 Judgements of the confidence in cumulative evidence will be evaluated using the Confidence in  
47 Network Meta-Analysis (CINeMA) framework,[80-82] a web application of the Grading of  
48 Recommendations Assessment, Development, and Evaluation ratings approach. The  
49 framework assesses six domains: within-study bias, across-studies bias, indirectness,  
50 imprecision, heterogeneity and incoherence.  
51  
52  
53  
54  
55

### 56 **Patient and public involvement**

57 Patients will not be involved.  
58  
59  
60

## CONTRIBUTIONS TO LITERATURE

To date, there is no conclusive consensus regarding the most effective psychological approach for managing chronic non-specific LBP. Previous studies have only investigated a small portion of available psychological interventions and have only conducted multiple independent pairwise meta-analyses which have not been synthesised. As such, clinical guidelines for chronic LBP, which are based on these reviews, remain vague regarding the specific type of psychological intervention which should be incorporated into treatment for the condition. This systematic review with NMA will synthesise direct and indirect evidence for a comprehensive variety of psychological interventions with respect to improving physical function, pain intensity, health-related quality of life, and fear avoidance in people with chronic non-specific LBP. The review will also assess the proportion of compliance to different psychological interventions in this population, as well as the safety of such interventions. The NMA will compare the competing interventions within the network and produce treatment effect estimates. Effect estimates will be used to generate relative treatment rankings, allowing us to rank the different types of psychological approaches for each outcome. Findings from this review will provide pragmatic support for clinical guideline recommendations regarding the use of psychological interventions for adults with chronic non-specific LBP.

## ETHICS AND DISSEMINATION

Ethical review will not be required as the systematic review will only involve the use of previously published data for analysis. Our intention is to publish the completed research in a peer-review journal and present our findings at national and international conferences.

## CONFLICTS OF INTEREST

There are no conflicts of interest in this study.

## AUTHOR CONTRIBUTIONS

All authors (EKH, MLF, LC, MS, CAJ, JC, JAH, PHF) conceived the study. EKH drafted the manuscript. EKH, LC and JC participated in the search strategy development. PHF assisted in the initial protocol design, and all authors (EKH, MLF, LC, MS, CAJ, JC, JAH, PHF) assisted in the protocol revision. LC provided statistical expertise. CA provided expertise on psychological interventions. All authors (EKH, MLF, LC, MS, CAJ, JC, JAH, PHF) read and approved the final manuscript as submitted.

1  
2  
3 **FUNDING**  
4

5 This research received no specific grant from any funding agency in the public, commercial or  
6 not-for-profit sectors.  
7  
8  
9  
10  
11  
12  
13  
14  
15  
16  
17  
18  
19  
20  
21  
22  
23  
24  
25  
26  
27  
28  
29  
30  
31  
32  
33  
34  
35  
36  
37  
38  
39  
40  
41  
42  
43  
44  
45  
46  
47  
48  
49  
50  
51  
52  
53  
54  
55  
56  
57  
58  
59  
60

For peer review only

## REFERENCES

1. Sebbag E, Felten R, Sagez F, et al. The World-Wide Burden of Musculoskeletal Diseases: A Systematic Analysis of the World Health Organization Burden of Diseases Database. *Ann Rheum Dis* 2019;**78**(6):844-848.
2. James SL, Abate D, Abate KH, et al. Global, Regional, and National Incidence, Prevalence, and Years Lived with Disability for 354 Diseases and Injuries for 195 Countries and Territories, 1990–2017: A Systematic Analysis for the Global Burden of Disease Study 2017. *The Lancet* 2018;**392**(10159):1789-1858.
3. Dagenais S, Caro J, Haldeman S. A Systematic Review of Low Back Pain Cost of Illness Studies in the United States and Internationally. *Spine J* 2008;**8**(1):8-20.
4. Hartvigsen J, Hancock MJ, Kongsted A, et al. What Low Back Pain Is and Why We Need to Pay Attention. *The Lancet* 2018;**391**(10137):2356-2367.
5. O’Sullivan PB, Caneiro J, O’Keeffe M, et al. Cognitive Functional Therapy: An Integrated Behavioral Approach for the Targeted Management of Disabling Low Back Pain. *Phys Ther* 2018;**98**(5):408-423.
6. O’Keeffe M, George SZ, O’Sullivan PB, et al. Psychosocial factors in low back pain: letting go of our misconceptions can help management. *Brit J Sport Med* 2019;**53**:793-794.
7. Ikemoto T, Miki K, Matsubara T, et al. Psychological Treatment Strategy for Chronic Low Back Pain. *Spine Surg Relat Res* 2019;**3**(3):199-206.
8. Wertli MM, Eugster R, Held U, et al. Catastrophizing—a Prognostic Factor for Outcome in Patients with Low Back Pain: A Systematic Review. *Spine J* 2014;**14**(11):2639-2657.
9. Pinheiro MB, Ferreira ML, Refshauge K, et al. Symptoms of Depression as a Prognostic Factor for Low Back Pain: A Systematic Review. *Spine J* 2016;**16**(1):105-116.
10. Buchbinder R, van Tulder M, Öberg B, et al. Low Back Pain: A Call for Action. *The Lancet* 2018;**391**(10137):2384-2388.
11. van Tulder MW, Ostelo R, Vlaeyen JW, et al. Behavioral Treatment for Chronic Low Back Pain: A Systematic Review within the Framework of the Cochrane Back Review Group. *Spine* 2000;**25**(20):2688-2699.
12. Hoffman BM, Papas RK, Chatkoff DK, et al. Meta-Analysis of Psychological Interventions for Chronic Low Back Pain. *Health Psychol* 2007;**26**(1):1.
13. Cramer H, Haller H, Lauche R, et al. Mindfulness-Based Stress Reduction for Low Back Pain. A Systematic Review. *BMC Complem Altern M* 2012;**12**(1):162.

14. Wilson S and Cramp F. Combining a Psychological Intervention with Physiotherapy: A Systematic Review to Determine the Effect on Physical Function and Quality of Life for Adults with Chronic Pain. *Phys Ther Rev* 2018;**23**(3):214-226.
15. Guzmán J, Esmail R, Karjalainen K, et al. Multidisciplinary Rehabilitation for Chronic Low Back Pain: Systematic Review. *BMJ* 2001;**322**(7301):1511-1516.
16. Silva Guerrero AV, Maujean A, Campbell L, et al. A Systematic Review and Meta-Analysis of the Effectiveness of Psychological Interventions Delivered by Physiotherapists on Pain, Disability and Psychological Outcomes in Musculoskeletal Pain Conditions. *Clinical J Pain* 2018;**34**(9):838-857.
17. Vitoula K, Venneri A, Varrassi G, et al. Behavioral Therapy Approaches for the Management of Low Back Pain: An up-to-Date Systematic Review. *Pain and Therapy* 2018;**7**(1):1-12.
18. Henschke N, Ostelo RW, van Tulder MW, et al. Behavioural Treatment for Chronic Low-Back Pain. *Cochrane Db Syst Rev* 2010;**7**(7):CD002014.
19. Anheyer D, Haller H, Barth J, et al. Mindfulness-Based Stress Reduction for Treating Low Back Pain: A Systematic Review and Meta-Analysis. *Ann Intern Med* 2017;**166**(11):799-807.
20. Holden J, Davidson M, O'Halloran P. Health Coaching for Low Back Pain: A Systematic Review of the Literature. *Int J Clin Pract* 2014;**68**(8):950-962.
21. Boehmer KR, Barakat S, Ahn S, et al. Health Coaching Interventions for Persons with Chronic Conditions: A Systematic Review and Meta-Analysis Protocol. *Syst Rev* 2016;**5**(1):146.
22. Wood L and Hendrick PA. A Systematic Review and Meta-Analysis of Pain Neuroscience Education for Chronic Low Back Pain: Short-and Long-Term Outcomes of Pain and Disability. *Eur J Pain* 2019;**23**(2):234-249.
23. Martinez-Calderon J, Flores-Cortés M, Morales-Asencio JM, et al. Conservative Interventions Reduce Fear in Individuals with Chronic Low Back Pain: A Systematic Review. *Arch Phys Med Rehab* 2019;**101**(2):329-358.
24. Chung EJ, Hur YG, Lee BH. A Study of the Relationship among Fear-Avoidance Beliefs, Pain and Disability Index in Patients with Low Back Pain. *J Exerc Rehabil* 2013;**9**(6):532.
25. Ferrari S, Chiarotto A, Pellizzer M, et al. Pain Self-Efficacy and Fear of Movement Are Similarly Associated with Pain Intensity and Disability in Italian Patients with Chronic Low Back Pain. *Pain Pract* 2016;**16**(8):1040-1047.
26. de Campos TF. Low Back Pain and Sciatica in over 16s: Assessment and Management Nice Guideline [Ng59]. *J Physiother* 2017;**63**(2):120.

- 1  
2  
3 27. Qaseem A, Wilt TJ, McLean RM, et al. Noninvasive Treatments for Acute, Subacute, and  
4 Chronic Low Back Pain: A Clinical Practice Guideline from the American College of  
5 Physicians. *Ann Intern Med* 2017;**166**(7):514-530.  
6  
7  
8 28. Chou R, Deyo R, Friedly J, et al. Nonpharmacologic Therapies for Low Back Pain: A  
9 Systematic Review for an American College of Physicians Clinical Practice Guideline. *Ann*  
10 *Intern Med* 2017;**166**(7), 493-505.  
11  
12 29. Van Wambeke P, Desomer A, Aillet L, et al. Low Back Pain and Radicular Pain:  
13 Assessment and Management. *KCE Report*. 2017;**287**.  
14  
15 30. Toward Optimized Practice (TOP) and Low Back Pain Working Group. Evidence-  
16 Informed Primary Care Management of Low Back Pain: Clinical Practice Guideline (3rd  
17 Edition). 2015. Edmonton, AB.  
18  
19 31. Foster NE, Anema JR, Cherkin D, et al. Prevention and Treatment of Low Back Pain:  
20 Evidence, Challenges, and Promising Directions. *The Lancet* 2018;**391**(10137):2368-2383.  
21  
22 32. Morley S, Eccleston C, Williams A. Systematic Review and Meta-Analysis of Randomized  
23 Controlled Trials of Cognitive Behaviour Therapy and Behaviour Therapy for Chronic Pain in  
24 Adults, Excluding Headache. *Pain* 1999;**80**(1-2):1-13.  
25  
26 33. Nielson WR and Weir R. Biopsychosocial Approaches to the Treatment of Chronic Pain.  
27 *Clin J Pain* 2001;**17**(4):S114-S127.  
28  
29 34. O'Keeffe M, O'Sullivan P, Purtill H, et al. Cognitive Functional Therapy Compared with a  
30 Group-Based Exercise and Education Intervention for Chronic Low Back Pain: A Multicentre  
31 Randomised Controlled Trial (Rct). *Brit J Sport Med*. Published Online First: 19 October 2019.  
32 doi: 10.1136/bjsports-2019-100780  
33  
34 35. Godfrey E, Wileman V, Holmes MG, et al. Physical Therapy Informed by Acceptance and  
35 Commitment Therapy (Pact) Versus Usual Care Physical Therapy for Adults with Chronic  
36 Low Back Pain: A Randomized Controlled Trial. *J Pain*. Published Online First: 5 June 2019.  
37 doi: 10.1016/j.jpain.2019.05.012  
38  
39 36. Synnott A, O'Keeffe M, Bunzli S, et al. Physiotherapists May Stigmatise or Feel  
40 Unprepared to Treat People with Low Back Pain and Psychosocial Factors That Influence  
41 Recovery: A Systematic Review. *J Physiother* 2015;**61**(2):68-76.  
42  
43 37. Alexanders J, Anderson A, Henderson S. Musculoskeletal Physiotherapists' Use of  
44 Psychological Interventions: A Systematic Review of Therapists' Perceptions and Practice.  
45 *Physiotherapy* 2015;**101**(2):95-102.  
46  
47 38. Holopainen MR, Simpson MP, Piirainen A, et al. Physiotherapists' Perceptions of Learning  
48 and Implementing a Biopsychosocial Intervention to Treat Musculoskeletal Pain Conditions: A  
49  
50  
51  
52  
53  
54  
55  
56  
57  
58  
59  
60



1  
2  
3 Systematic Review and Metasynthesis of Qualitative Studies. *Pain*. Published Online First: 16  
4 January 2020. doi: 10.1097/j.pain.0000000000001809

5  
6 39. Gardner T, Refshauge K, Smith L, et al. Physiotherapists' Beliefs and Attitudes Influence  
7 Clinical Practice in Chronic Low Back Pain: A Systematic Review of Quantitative and  
8 Qualitative Studies. *J Physiother* 2017;**63**(3):132-143.

9  
10 40. Dias S, Welton NJ, Sutton AJ, et al. Evidence Synthesis for Decision Making 1:  
11 Introduction. *Med Decis Making* 2013;**33**(5):597-606.

12  
13 41. Salanti G. Indirect and Mixed-Treatment Comparison, Network, or Multiple-Treatments  
14 Meta-Analysis: Many Names, Many Benefits, Many Concerns for the Next Generation  
15 Evidence Synthesis Tool. *Res Synth Methods* 2012;**3**(2):80-97.

16  
17 42. Jansen JP and Naci H. Is Network Meta-Analysis as Valid as Standard Pairwise Meta-  
18 Analysis? It All Depends on the Distribution of Effect Modifiers. *BMC Med* 2013;**11**(1):159.

19  
20 43. Bagg MK, Salanti G, McAuley JH. Comparing Interventions with Network Meta-Analysis.  
21 *J Physiother* 2018;**64**(2):128-132.

22  
23 44. Efthimiou O, Debray TP, van Valkenhoef G, et al. Getreal in Network Meta-Analysis: A  
24 Review of the Methodology. *Res Synth Methods* 2016;**7**(3):236-263.

25  
26 45. Moher D, Liberati A, Tetzlaff J. Preferred Reporting Items for Systematic Reviews and  
27 Meta-Analyses: The PRISMA Statement. *Ann Intern Med* 2009;**151**.

28  
29 46. Moher D, Shamseer L, Clarke M, et al. Preferred Reporting Items for Systematic Review  
30 and Meta-Analysis Protocols (PRISMA -P) 2015 Statement. *Syst Rev* 2015;**4**(1):1.

31  
32 47. Hutton B, Catala-Lopez F, Moher D. The Prisma Statement Extension for Systematic  
33 Reviews Incorporating Network Meta-Analysis: PRISMA -NMA. *Med Clin (Barc)*  
34 2016;**147**(6):262-266.

35  
36 48. Higgins JP, Chandler J, Cumpston M, Li T, Page MJ, Welch VA (editors). Cochrane  
37 Handbook for Systematic Reviews of Interventions Version 6.0 (Updated July 2019). 2019:  
38 Cochrane, 2019. Available from [www.training.cochrane.org/handbook](http://www.training.cochrane.org/handbook).

39  
40 49. Savigny P, Kuntze S, Watson P, et al. Low Back Pain: Early Management of Persistent  
41 Non-Specific Low Back Pain. London: National Collaborating Centre for Primary Care and  
42 Royal College of General Practitioners. 2009;**14**(NICE Clinical Guidelines, No. 88).

43  
44 50. Analytics C. *Endnote X9*. 2020.

45  
46 51. Covidence. *Covidence Systematic Review Software*. Veritas Health Innovation. Melbourne,  
47 Australia; Available from: <https://www.covidence.org/>.

48  
49 52. Chiarotto A, Boers M, Deyo RA, et al. Core Outcome Measurement Instruments for  
50 Clinical Trials in Nonspecific Low Back Pain. *Pain* 2018;**159**(3):481.

- 1  
2  
3 53. Clement RC, Welander A, Stowell C, et al. A Proposed Set of Metrics for Standardized  
4 Outcome Reporting in the Management of Low Back Pain. *Acta Orthop* 2015;**86**(5):523-533.  
5  
6 54. George SZ, Valencia C, Beneciuk JM. A Psychometric Investigation of Fear-Avoidance  
7 Model Measures in Patients with Chronic Low Back Pain. *J Orthop Sport Phys*  
8 2010;**40**(4):197-205.  
9  
10 55. Caldwell DM and Welton NJ. Approaches for Synthesising Complex Mental Health  
11 Interventions in Meta-Analysis. *Evid Based Ment Health* 2016;**19**(1):16-21.  
12  
13 56. Semple RJ. Does Mindfulness Meditation Enhance Attention? A Randomized Controlled  
14 Trial. *Mindfulness* 2010;**1**(2):121-130.  
15  
16 57. Louw A, Diener I, Landers MR, et al. Preoperative Pain Neuroscience Education for  
17 Lumbar Radiculopathy: A Multicenter Randomized Controlled Trial with 1-Year Follow-Up.  
18 *Spine* 2014;**39**(18):1449-1457.  
19  
20 58. Sterne JA, Savović J, Page MJ, et al. Rob 2: A Revised Tool for Assessing Risk of Bias in  
21 Randomised Trials. *BMJ* 2019;**366**:l4898.  
22  
23 59. Higgins JP, Sterne JA, Savovic J, et al. A Revised Tool for Assessing Risk of Bias in  
24 Randomized Trials. *Cochrane Db Syst Rev* 2016;**10**(Suppl 1):29-31.  
25  
26 60. Eldridge S, Campbell M, Campbell M, et al. Revised Cochrane Risk of Bias Tool for  
27 Randomized Trials (RoB 2.0): Additional Considerations for Cluster-Randomized Trials. 2016.  
28  
29 61. StataCorp. 2015. Stata Statistical Software: Release 14. College Station, TX: StataCorp LP.  
30  
31 62. White IR. Network Meta-Analysis. *Stata J* 2015;**15**(4):951-985.  
32  
33 63. White IR. Multivariate Random-Effects Meta-Analysis. *Stata J* 2009;**9**(1):40-56.  
34  
35 64. White IR. Multivariate Random-Effects Meta-Regression: Updates to Mvmeta. *Stata J*  
36 2011;**11**(2):255-270.  
37  
38 65. Chaimani A, Higgins JP, Mavridis D, et al. Graphical Tools for Network Meta-Analysis in  
39 Stata. *PLoS One* 2013;**8**(10).  
40  
41 66. Chaimani A and Salanti G. Visualizing Assumptions and Results in Network Meta-  
42 Analysis: The Network Graphs Package. *Stata J* 2015;**15**(4):905-950.  
43  
44 67. Int'Hout J, Ioannidis JP, Borm GF. The Hartung-Knapp-Sidik-Jonkman Method for  
45 Random Effects Meta-Analysis Is Straightforward and Considerably Outperforms the Standard  
46 Dersimonian-Laird Method. *BMC Med Res Methodol* 2014;**14**(1):25.  
47  
48 68. Salanti G, Ades A, Ioannidis JP. Graphical Methods and Numerical Summaries for  
49 Presenting Results from Multiple-Treatment Meta-Analysis: An Overview and Tutorial. *J Clin*  
50 *Epidemiol* 2011;**64**(2):163-171.  
51  
52  
53  
54  
55  
56  
57  
58  
59  
60

- 1  
2  
3 69. Gurung T, Ellard DR, Mistry D, et al. Identifying Potential Moderators for Response to  
4 Treatment in Low Back Pain: A Systematic Review. *Physiotherapy* 2015;**101**(3):243-251.  
5  
6 70. Wang RAH, Nelson-Coffey SK, Layous K, et al. Moderators of Wellbeing Interventions:  
7 Why Do Some People Respond More Positively Than Others? *PLoS One* 2017;**12**(11).  
8  
9 71. DasMahapatra P, Chiauzzi E, Pujol LM, et al. Mediators and Moderators of Chronic Pain  
10 Outcomes in an Online Self-Management Program. *Clin J Pain* 2015;**31**(5):404-413.  
11  
12 72. Rojiani R, Santoyo JF, Rahrig H, et al. Women Benefit More Than Men in Response to  
13 College-Based Meditation Training. *Frontiers in Psychology* 2017;**8**:551.  
14  
15 73. Dechartres A, Trinquart L, Faber T, et al. Empirical Evaluation of Which Trial  
16 Characteristics Are Associated with Treatment Effect Estimates. *J Clin Epidemiol* 2016;**77**:24-  
17 37.  
18  
19 74. Wertli MM, Rasmussen-Barr E, Held U, et al. Fear-Avoidance Beliefs—a Moderator of  
20 Treatment Efficacy in Patients with Low Back Pain: A Systematic Review. *Spine J*  
21 2014;**14**(11):2658-2678.  
22  
23 75. Cipriani A, Higgins JP, Geddes JR, et al. Conceptual and Technical Challenges in Network  
24 Meta-Analysis. *Ann Intern Med* 2013;**159**(2):130-137.  
25  
26 76. Chaimani A, Caldwell DM, Li T, et al. Chapter 11: Undertaking network meta-analyses. In:  
27 Higgins JPT, Thomas J, Chandler J, Cumpston M, Li T, Page MJ, Welch VA (editors).  
28 Cochrane Handbook for Systematic Reviews of Interventions version 6.0 (updated July 2019).  
29 Cochrane, 2019. Available from: [www.training.cochrane.org/handbook](http://www.training.cochrane.org/handbook)  
30  
31 77. Higgins J, Jackson D, Barrett J, et al. Consistency and Inconsistency in Network  
32 Meta-Analysis: Concepts and Models for Multi-Arm Studies. *Res Synth Methods* 2012;**3**(2):98-  
33 110.  
34  
35 78. Bucher HC, Guyatt GH, Griffith LE, et al. The Results of Direct and Indirect Treatment  
36 Comparisons in Meta-Analysis of Randomized Controlled Trials. *J Clin Epidemiol*  
37 1997;**50**(6):683-691.  
38  
39 79. Chaimani A and Salanti G. Using Network Meta-Analysis to Evaluate the Existence of  
40 Small-Study Effects in a Network of Interventions. *Res Synth Methods* 2012;**3**(2):161-176.  
41  
42 80. Institute of Social and Preventive Medicine. *CINeMA: Confidence in Network Meta-*  
43 *Analysis* 2017. Available from: [cinema.ispm.unibe.ch](http://cinema.ispm.unibe.ch).  
44  
45 81. Nikolakopoulou A, Higgins JP, Papakonstantinou T, et al. Cinema: An Approach for  
46 Assessing Confidence in the Results of a Network Meta-Analysis. *PLoS Med*  
47 2020;**17**(4):e1003082.  
48  
49  
50  
51  
52  
53  
54  
55  
56  
57  
58  
59  
60

1  
2  
3 82. Papakonstantinou T, Nikolakopoulou A, Higgins JP, et al. CINeMA: Software for  
4 Semiautomated Assessment of the Confidence in the Results of Network Meta-Analysis.  
5 *Campbell Syst Rev* 2020;**16**(1):e1080.  
6  
7  
8  
9  
10  
11  
12  
13  
14  
15  
16  
17  
18  
19  
20  
21  
22  
23  
24  
25  
26  
27  
28  
29  
30  
31  
32  
33  
34  
35  
36  
37  
38  
39  
40  
41  
42  
43  
44  
45  
46  
47  
48  
49  
50  
51  
52  
53  
54  
55  
56  
57  
58  
59  
60

For peer review only

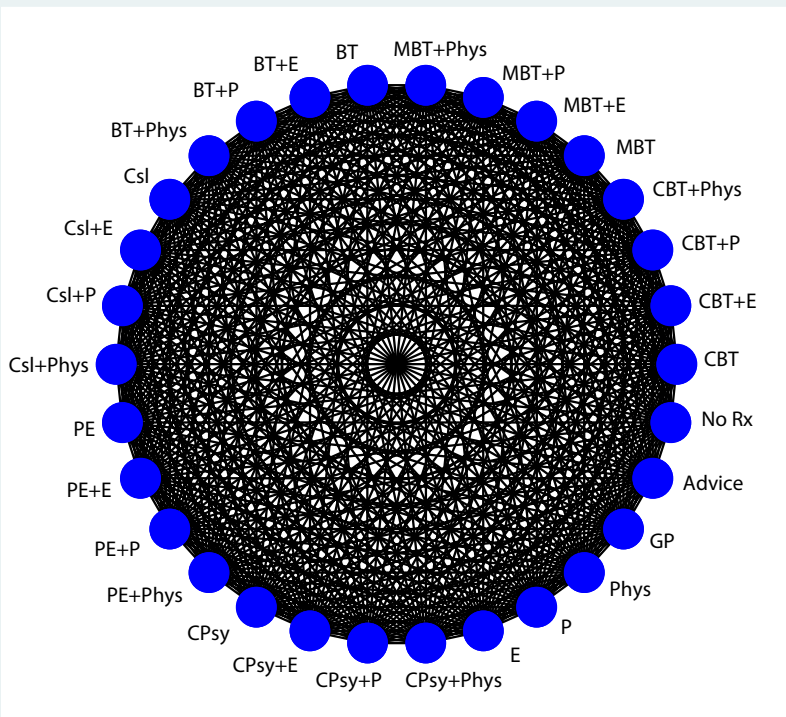

BT: behavioural therapies; CBT: cognitive behavioural therapies; MBT: mindfulness-based therapies; Csl: counselling-based therapies;  
 PE: pain education; CPsy: combination of psychological interventions; E: exercise; P: passive treatment; Phys: physiotherapy; GP:  
 general practitioner care; No Rx: no intervention.

<http://bmjopen.bmj.com/site/about/guidelines.xhtml>

**APPENDIX A**

Database: Ovid MEDLINE

1. exp Back Pain/ or exp Low Back Pain/ or exp Backache/
2. (back pain or low back pain or lumbar pain or lumbago or dorsalgia or spinal pain or vertebral pain or backache or lumbar spine).ti,ab.
3. 1 or 2
4. exp Behavior Therapy/ or exp Cognitive Therapy/ or \*Conditioning, Operant/ or exp Reinforcement, Psychology/
5. (operant conditioning or reinforcement or psychological intervention or psychological therapy).ab,ti.
6. (cognitiv\* adj1 (treatment\* or therap\* or intervention\*)).ab,ti.
7. (behavio?r\* adj1 (treatment\* or therap\* or intervention\* or techniqu\* or modific\* or change\*)).ab,ti.
8. (graded exposure or desensiti\* or imagery or goal setting).ab,ti.
9. (acceptance and commitment therapy or CBT).ab,ti.
10. 4 or 5 or 6 or 7 or 8 or 9
11. exp Mindfulness/ or \*Mind-Body Therapies/ or exp Meditation/ or exp Relaxation/ or exp Relaxation Therapy/
12. (mindfulness based stress reduction\*).ab,ti.
13. (mindfulness or mind-body therapies or meditation or relaxation or relaxation therap\*).ab,ti.
14. (mbsr\* or mbct\*).ab,ti.
15. 11 or 12 or 13 or 14
16. (cognitive functional therapy or CFT).ab,ti.
17. exp Health Education/ or exp Health Promotion/ or exp Motivation/
18. (health education or health promotion or motivation).ab,ti.
19. ((health or wellness or life-style or behav\*) adj1 coach\*).ab,ti.
20. ((wellness or behav\*) adj1 intervention\*).ab,ti.
21. or/ 17 or 18 or 19 or 20
22. exp Biofeedback, Psychology/ or exp Feedback, Psychological/
23. (electromyograph\* or electromyogram\* or EMG\*).ab,ti.
24. (bio-feedback or feedback).ab,ti.
25. 22 or 23 or 24

- 1
  - 2
  - 3
  - 4
  - 5
  - 6
  - 7
  - 8
  - 9
  - 10
  - 11
  - 12
  - 13
  - 14
  - 15
  - 16
  - 17
  - 18
  - 19
  - 20
  - 21
  - 22
  - 23
  - 24
  - 25
  - 26
  - 27
  - 28
  - 29
  - 30
  - 31
  - 32
  - 33
  - 34
  - 35
  - 36
  - 37
  - 38
  - 39
  - 40
  - 41
  - 42
  - 43
  - 44
  - 45
  - 46
  - 47
  - 48
  - 49
  - 50
  - 51
  - 52
  - 53
  - 54
  - 55
  - 56
  - 57
  - 58
  - 59
  - 60
26. (pain neuroscience education or pain education or neuroscience education or pain physiology education or neuro-physiology education or therapeutic education).ab,ti.
27. exp Counseling/
28. (counseling or supportive psychotherap\*).ab,ti.
29. 27 or 28
30. 10 or 15 or 16 or 21 or 25 or 26 or 29
31. 3 and 30
32. exp Randomized controlled trial/ or \*Clinical Trial/ or \*Random allocation/ or exp Controlled clinical trial/
33. randomized controlled trial.pt.
34. (random\* adj3 trial).ab,ti.
35. (clinical trial or random allocation or controlled clinical trial).ab,ti.
36. 32 or 33 or 34 or 35
37. 31 and 36
38. limit 37 to humans

**PRISMA-P (Preferred Reporting Items for Systematic review and Meta-Analysis Protocols) 2015 checklist: recommended items to address in a systematic review protocol\***

| Section and topic                 | Item No | Checklist item                                                                                                                                                                                                                | Page                                       |
|-----------------------------------|---------|-------------------------------------------------------------------------------------------------------------------------------------------------------------------------------------------------------------------------------|--------------------------------------------|
| <b>ADMINISTRATIVE INFORMATION</b> |         |                                                                                                                                                                                                                               |                                            |
| Title:                            |         |                                                                                                                                                                                                                               |                                            |
| Identification                    | 1a      | Identify the report as a protocol of a systematic review                                                                                                                                                                      | 1                                          |
| Update                            | 1b      | If the protocol is for an update of a previous systematic review, identify as such                                                                                                                                            | N/A                                        |
| Registration                      | 2       | If registered, provide the name of the registry (such as PROSPERO) and registration number                                                                                                                                    | 2, 7                                       |
| Authors:                          |         |                                                                                                                                                                                                                               |                                            |
| Contact                           | 3a      | Provide name, institutional affiliation, e-mail address of all protocol authors; provide physical mailing address of corresponding author                                                                                     | 1                                          |
| Contributions                     | 3b      | Describe contributions of protocol authors and identify the guarantor of the review                                                                                                                                           | 20                                         |
| Amendments                        | 4       | If the protocol represents an amendment of a previously completed or published protocol, identify as such and list changes; otherwise, state plan for documenting important protocol amendments                               | Cover letter and Letter of reply to editor |
| Support:                          |         |                                                                                                                                                                                                                               |                                            |
| Sources                           | 5a      | Indicate sources of financial or other support for the review                                                                                                                                                                 | 1, 20                                      |
| Sponsor                           | 5b      | Provide name for the review funder and/or sponsor                                                                                                                                                                             |                                            |
| Role of sponsor or funder         | 5c      | Describe roles of funder(s), sponsor(s), and/or institution(s), if any, in developing the protocol                                                                                                                            |                                            |
| <b>INTRODUCTION</b>               |         |                                                                                                                                                                                                                               |                                            |
| Rationale                         | 6       | Describe the rationale for the review in the context of what is already known                                                                                                                                                 | 4-7                                        |
| Objectives                        | 7       | Provide an explicit statement of the question(s) the review will address with reference to participants, interventions, comparators, and outcomes (PICO)                                                                      | 6                                          |
| <b>METHODS</b>                    |         |                                                                                                                                                                                                                               |                                            |
| Eligibility criteria              | 8       | Specify the study characteristics (such as PICO, study design, setting, time frame) and report characteristics (such as years considered, language, publication status) to be used as criteria for eligibility for the review | 7-10                                       |
| Information sources               | 9       | Describe all intended information sources (such as electronic databases, contact with study authors, trial registers or other grey literature sources) with planned dates of coverage                                         | 10                                         |



|                                    |     |                                                                                                                                                                                                                                                  |            |
|------------------------------------|-----|--------------------------------------------------------------------------------------------------------------------------------------------------------------------------------------------------------------------------------------------------|------------|
| Search strategy                    | 10  | Present draft of search strategy to be used for at least one electronic database, including planned limits, such that it could be repeated                                                                                                       | Appendix A |
| Study records:                     |     |                                                                                                                                                                                                                                                  |            |
| Data management                    | 11a | Describe the mechanism(s) that will be used to manage records and data throughout the review                                                                                                                                                     | 11         |
| Selection process                  | 11b | State the process that will be used for selecting studies (such as two independent reviewers) through each phase of the review (that is, screening, eligibility and inclusion in meta-analysis)                                                  | 11         |
| Data collection process            | 11c | Describe planned method of extracting data from reports (such as piloting forms, done independently, in duplicate), any processes for obtaining and confirming data from investigators                                                           | 11         |
| Data items                         | 12  | List and define all variables for which data will be sought (such as PICO items, funding sources), any pre-planned data assumptions and simplifications                                                                                          | 11-13      |
| Outcomes and prioritization        | 13  | List and define all outcomes for which data will be sought, including prioritization of main and additional outcomes, with rationale                                                                                                             | 9-10       |
| Risk of bias in individual studies | 14  | Describe anticipated methods for assessing risk of bias of individual studies, including whether this will be done at the outcome or study level, or both; state how this information will be used in data synthesis                             | 15-16      |
| Data synthesis                     | 15a | Describe criteria under which study data will be quantitatively synthesised                                                                                                                                                                      | 16-19      |
|                                    | 15b | If data are appropriate for quantitative synthesis, describe planned summary measures, methods of handling data and methods of combining data from studies, including any planned exploration of consistency (such as $I^2$ , Kendall's $\tau$ ) | 16-19      |
|                                    | 15c | Describe any proposed additional analyses (such as sensitivity or subgroup analyses, meta-regression)                                                                                                                                            | 16-19      |
|                                    | 15d | If quantitative synthesis is not appropriate, describe the type of summary planned                                                                                                                                                               | 16-19      |
| Meta-bias(es)                      | 16  | Specify any planned assessment of meta-bias(es) (such as publication bias across studies, selective reporting within studies)                                                                                                                    | 20         |
| Confidence in cumulative evidence  | 17  | Describe how the strength of the body of evidence will be assessed (such as GRADE)                                                                                                                                                               | 20         |

**\* It is strongly recommended that this checklist be read in conjunction with the PRISMA-P Explanation and Elaboration (cite when available) for important clarification on the items. Amendments to a review protocol should be tracked and dated. The copyright for PRISMA-P (including checklist) is held by the PRISMA-P Group and is distributed under a Creative Commons Attribution Licence 4.0.**

*From: Shamseer L, Moher D, Clarke M, Ghersi D, Liberati A, Petticrew M, Shekelle P, Stewart L, PRISMA-P Group. Preferred reporting items for systematic review and meta-analysis protocols (PRISMA-P) 2015: elaboration and explanation. BMJ. 2015 Jan 2;349(jan02 1):g7647.*

PRISMA NMA Checklist of Items to Include When Reporting A Systematic Review Involving a Network Meta-analysis

| Section/Topic             | Item # | Checklist Item                                                                                                                                                                                                                                                                                                                                                                                                                                                                                                                                                                                                                                                                                                                                                                                     | Reported on Page # |
|---------------------------|--------|----------------------------------------------------------------------------------------------------------------------------------------------------------------------------------------------------------------------------------------------------------------------------------------------------------------------------------------------------------------------------------------------------------------------------------------------------------------------------------------------------------------------------------------------------------------------------------------------------------------------------------------------------------------------------------------------------------------------------------------------------------------------------------------------------|--------------------|
| <b>TITLE</b>              |        |                                                                                                                                                                                                                                                                                                                                                                                                                                                                                                                                                                                                                                                                                                                                                                                                    |                    |
| Title                     | 1      | Identify the report as a systematic review <i>incorporating a network meta-analysis (or related form of meta-analysis)</i> .                                                                                                                                                                                                                                                                                                                                                                                                                                                                                                                                                                                                                                                                       | <b>1</b>           |
| <b>ABSTRACT</b>           |        |                                                                                                                                                                                                                                                                                                                                                                                                                                                                                                                                                                                                                                                                                                                                                                                                    |                    |
| Structured summary        | 2      | Provide a structured summary including, as applicable:<br><b>Background:</b> main objectives<br><b>Methods:</b> data sources; study eligibility criteria, participants, and interventions; study appraisal; and <i>synthesis methods, such as network meta-analysis</i> .<br><b>Results:</b> number of studies and participants identified; summary estimates with corresponding confidence/credible intervals; <i>treatment rankings may also be discussed</i> .<br><i>Authors may choose to summarize pairwise comparisons against a chosen treatment included in their analyses for brevity.</i><br><b>Discussion/Conclusions:</b> limitations; conclusions and implications of findings.<br><b>Other:</b> primary source of funding; systematic review registration number with registry name. | <b>2</b>           |
| <b>INTRODUCTION</b>       |        |                                                                                                                                                                                                                                                                                                                                                                                                                                                                                                                                                                                                                                                                                                                                                                                                    |                    |
| Rationale                 | 3      | Describe the rationale for the review in the context of what is already known, <i>including mention of why a network meta-analysis has been conducted</i> .                                                                                                                                                                                                                                                                                                                                                                                                                                                                                                                                                                                                                                        | <b>4-7</b>         |
| Objectives                | 4      | Provide an explicit statement of questions being addressed, with reference to participants, interventions, comparisons, outcomes, and study design (PICOS).                                                                                                                                                                                                                                                                                                                                                                                                                                                                                                                                                                                                                                        | <b>7</b>           |
| <b>METHODS</b>            |        |                                                                                                                                                                                                                                                                                                                                                                                                                                                                                                                                                                                                                                                                                                                                                                                                    |                    |
| Protocol and registration | 5      | Indicate whether a review protocol exists and if and where it can be accessed (e.g., Web address); and, if available, provide registration information, including registration number.                                                                                                                                                                                                                                                                                                                                                                                                                                                                                                                                                                                                             | <b>7</b>           |
| Eligibility criteria      | 6      | Specify study characteristics (e.g., PICOS, length of follow-up) and report characteristics (e.g., years considered, language, publication status) used as criteria for eligibility, giving rationale. <i>Clearly describe eligible treatments included in the treatment network, and note whether any have been clustered or merged into the same node (with justification)</i> .                                                                                                                                                                                                                                                                                                                                                                                                                 | <b>7-10</b>        |
| Information sources       | 7      | Describe all information sources (e.g., databases with dates of coverage, contact with study authors to identify additional studies) in the search and date last searched.                                                                                                                                                                                                                                                                                                                                                                                                                                                                                                                                                                                                                         | <b>10</b>          |
| Search                    | 8      | Present full electronic search strategy for at least one                                                                                                                                                                                                                                                                                                                                                                                                                                                                                                                                                                                                                                                                                                                                           | <b>Appendix</b>    |

|                                        |           |                                                                                                                                                                                                                                                                                                                                                                                                                                                   |              |
|----------------------------------------|-----------|---------------------------------------------------------------------------------------------------------------------------------------------------------------------------------------------------------------------------------------------------------------------------------------------------------------------------------------------------------------------------------------------------------------------------------------------------|--------------|
|                                        |           | database, including any limits used, such that it could be repeated.                                                                                                                                                                                                                                                                                                                                                                              | <i>A</i>     |
| Study selection                        | 9         | State the process for selecting studies (i.e., screening, eligibility, included in systematic review, and, if applicable, included in the meta-analysis).                                                                                                                                                                                                                                                                                         | <i>10</i>    |
| Data collection process                | 10        | Describe method of data extraction from reports (e.g., piloted forms, independently, in duplicate) and any processes for obtaining and confirming data from investigators.                                                                                                                                                                                                                                                                        | <i>11-13</i> |
| Data items                             | 11        | List and define all variables for which data were sought (e.g., PICOS, funding sources) and any assumptions and simplifications made.                                                                                                                                                                                                                                                                                                             | <i>11-13</i> |
| <b>Geometry of the network</b>         | <b>S1</b> | Describe methods used to explore the geometry of the treatment network under study and potential biases related to it. This should include how the evidence base has been graphically summarized for presentation, and what characteristics were compiled and used to describe the evidence base to readers.                                                                                                                                      | <i>17</i>    |
| Risk of bias within individual studies | 12        | Describe methods used for assessing risk of bias of individual studies (including specification of whether this was done at the study or outcome level), and how this information is to be used in any data synthesis.                                                                                                                                                                                                                            | <i>15-16</i> |
| Summary measures                       | 13        | State the principal summary measures (e.g., risk ratio, difference in means). <i>Also describe the use of additional summary measures assessed, such as treatment rankings and surface under the cumulative ranking curve (SUCRA) values, as well as modified approaches used to present summary findings from meta-analyses.</i>                                                                                                                 | <i>16-18</i> |
| Planned methods of analysis            | 14        | Describe the methods of handling data and combining results of studies for each network meta-analysis. This should include, but not be limited to: <ul style="list-style-type: none"> <li>• <i>Handling of multi-arm trials;</i></li> <li>• <i>Selection of variance structure;</i></li> <li>• <i>Selection of prior distributions in Bayesian analyses; and</i></li> <li>• <i>Assessment of model fit.</i></li> </ul>                            | <i>16-18</i> |
| <b>Assessment of Inconsistency</b>     | <b>S2</b> | Describe the statistical methods used to evaluate the agreement of direct and indirect evidence in the treatment network(s) studied. Describe efforts taken to address its presence when found.                                                                                                                                                                                                                                                   | <i>18</i>    |
| Risk of bias across studies            | 15        | Specify any assessment of risk of bias that may affect the cumulative evidence (e.g., publication bias, selective reporting within studies).                                                                                                                                                                                                                                                                                                      | <i>20</i>    |
| Additional analyses                    | 16        | Describe methods of additional analyses if done, indicating which were pre-specified. This may include, but not be limited to, the following: <ul style="list-style-type: none"> <li>• Sensitivity or subgroup analyses;</li> <li>• Meta-regression analyses;</li> <li>• <i>Alternative formulations of the treatment network; and</i></li> <li>• <i>Use of alternative prior distributions for Bayesian analyses (if applicable).</i></li> </ul> | <i>17-20</i> |

## RESULTS†

|                                          |           |                                                                                                                                                                                                                                                                                                                                                                                                                                                              |                             |
|------------------------------------------|-----------|--------------------------------------------------------------------------------------------------------------------------------------------------------------------------------------------------------------------------------------------------------------------------------------------------------------------------------------------------------------------------------------------------------------------------------------------------------------|-----------------------------|
| Study selection                          | 17        | Give numbers of studies screened, assessed for eligibility, and included in the review, with reasons for exclusions at each stage, ideally with a flow diagram.                                                                                                                                                                                                                                                                                              | <i>N/A – protocol paper</i> |
| <b>Presentation of network structure</b> | <b>S3</b> | Provide a network graph of the included studies to enable visualization of the geometry of the treatment network.                                                                                                                                                                                                                                                                                                                                            | <i>N/A – protocol paper</i> |
| <b>Summary of network geometry</b>       | <b>S4</b> | Provide a brief overview of characteristics of the treatment network. This may include commentary on the abundance of trials and randomized patients for the different interventions and pairwise comparisons in the network, gaps of evidence in the treatment network, and potential biases reflected by the network structure.                                                                                                                            | <i>N/A – protocol paper</i> |
| Study characteristics                    | 18        | For each study, present characteristics for which data were extracted (e.g., study size, PICOS, follow-up period) and provide the citations.                                                                                                                                                                                                                                                                                                                 | <i>N/A – protocol paper</i> |
| Risk of bias within studies              | 19        | Present data on risk of bias of each study and, if available, any outcome level assessment.                                                                                                                                                                                                                                                                                                                                                                  | <i>N/A – protocol paper</i> |
| Results of individual studies            | 20        | For all outcomes considered (benefits or harms), present, for each study: 1) simple summary data for each intervention group, and 2) effect estimates and confidence intervals. <i>Modified approaches may be needed to deal with information from larger networks.</i>                                                                                                                                                                                      | <i>N/A – protocol paper</i> |
| Synthesis of results                     | 21        | Present results of each meta-analysis done, including confidence/credible intervals. <i>In larger networks, authors may focus on comparisons versus a particular comparator (e.g. placebo or standard care), with full findings presented in an appendix. League tables and forest plots may be considered to summarize pairwise comparisons.</i> If additional summary measures were explored (such as treatment rankings), these should also be presented. | <i>N/A – protocol paper</i> |
| <b>Exploration for inconsistency</b>     | <b>S5</b> | Describe results from investigations of inconsistency. This may include such information as measures of model fit to compare consistency and inconsistency models, <i>P</i> values from statistical tests, or summary of inconsistency estimates from different parts of the treatment network.                                                                                                                                                              | <i>N/A – protocol paper</i> |
| Risk of bias across studies              | 22        | Present results of any assessment of risk of bias across studies for the evidence base being studied.                                                                                                                                                                                                                                                                                                                                                        | <i>N/A – protocol paper</i> |
| Results of additional analyses           | 23        | Give results of additional analyses, if done (e.g., sensitivity or subgroup analyses, meta-regression analyses, <i>alternative network geometries studied, alternative choice of prior distributions for Bayesian analyses, and so forth</i> ).                                                                                                                                                                                                              | <i>N/A – protocol paper</i> |
| <b>DISCUSSION</b>                        |           |                                                                                                                                                                                                                                                                                                                                                                                                                                                              |                             |
| Summary of evidence                      | 24        | Summarize the main findings, including the strength of evidence for each main outcome; consider their relevance to key groups (e.g., healthcare providers, users, and policy-                                                                                                                                                                                                                                                                                | <i>N/A – protocol paper</i> |

|                |    |                                                                                                                                                                                                                                                                                                                                                                                                                                |                             |
|----------------|----|--------------------------------------------------------------------------------------------------------------------------------------------------------------------------------------------------------------------------------------------------------------------------------------------------------------------------------------------------------------------------------------------------------------------------------|-----------------------------|
|                |    | makers).                                                                                                                                                                                                                                                                                                                                                                                                                       |                             |
| Limitations    | 25 | Discuss limitations at study and outcome level (e.g., risk of bias), and at review level (e.g., incomplete retrieval of identified research, reporting bias). <i>Comment on the validity of the assumptions, such as transitivity and consistency. Comment on any concerns regarding network geometry (e.g., avoidance of certain comparisons).</i>                                                                            | <i>N/A – protocol paper</i> |
| Conclusions    | 26 | Provide a general interpretation of the results in the context of other evidence, and implications for future research.                                                                                                                                                                                                                                                                                                        | <i>N/A – protocol paper</i> |
| <b>FUNDING</b> |    |                                                                                                                                                                                                                                                                                                                                                                                                                                |                             |
| Funding        | 27 | Describe sources of funding for the systematic review and other support (e.g., supply of data); role of funders for the systematic review. This should also include information regarding whether funding has been received from manufacturers of treatments in the network and/or whether some of the authors are content experts with professional conflicts of interest that could affect use of treatments in the network. | 22                          |

PICOS = population, intervention, comparators, outcomes, study design.

\* Text in italics indicates wording specific to reporting of network meta-analyses that has been added to guidance from the PRISMA statement.

† Authors may wish to plan for use of appendices to present all relevant information in full detail for items in this section.

### **Box. Terminology: Reviews With Networks of Multiple Treatments**

Different terms have been used to identify systematic reviews that incorporate a network of multiple treatment comparisons. A brief overview of common terms follows.

*Indirect treatment comparison:* Comparison of 2 interventions for which studies against a common comparator, such as placebo or a standard treatment, are available (i.e., indirect information). The direct treatment effects of each intervention against the common comparator (i.e., treatment effects from a comparison of interventions made within a study) may be used to estimate an indirect treatment comparison between the 2 interventions (**Appendix Figure 1, A**). An indirect treatment comparison (ITC) may also involve multiple links. For example, in **Appendix Figure 1, B**, treatments B and D may be compared indirectly on the basis of studies encompassing comparisons of B versus C, A versus C, and A versus D.

*Network meta-analysis or mixed treatment comparison:* These terms, which are often used interchangeably, refer to situations involving the simultaneous comparison of 3 or more interventions. Any network of treatments consisting of strictly unclosed loops can be thought of as a series of ITCs (**Appendix Figure 1, A and B**). In mixed treatment comparisons, both direct and indirect information is available to inform the effect size estimates for at least some of the comparisons; visually, this is shown by closed loops in a network graph (**Appendix Figure 1, C**). Closed loops are not required to be present for every comparison under study. "Network meta-analysis" is an inclusive term that incorporates the scenarios of both indirect and mixed treatment comparisons.

*Network geometry evaluation:* The description of characteristics of the network of interventions, which may include use of numerical summary statistics. This does not involve quantitative synthesis to compare treatments. This evaluation describes the current evidence available for the competing interventions to identify gaps and potential bias. Network geometry is described further in **Appendix Box 4**.

### **Appendix Box 1. The Assumption of Transitivity for Network Meta-Analysis**

Methods for indirect treatment comparisons and network meta-analysis enable learning about the relative treatment effects of, for example, treatments A and B through use of studies where these interventions are compared against a common therapy, C.

When planning a network meta-analysis, it is important to assess patient and study characteristics across the studies that compare pairs of treatments. These characteristics are commonly referred to as *effect modifiers* and include traits such as average patient age, gender distribution, disease severity, and a wide range of other plausible features.

For network meta-analysis to produce valid results, it is important that the distribution of effect modifiers is similar, for example, across studies of A versus B and A versus C. This balance increases the plausibility of reliable findings from an indirect comparison of B versus C through the common comparator A. When this balance is present, the assumption of transitivity can be judged to hold.

Authors of network meta-analyses should present systematic (and even tabulated) information regarding patient and study characteristics whenever available. This information helps readers to empirically evaluate the validity of the assumption of transitivity by reviewing the distribution of potential effect modifiers across trials.

review only

### **Appendix Box 2. Differences in Approach to Fitting Network Meta-Analyses**

Network meta-analysis can be performed within either a frequentist or a Bayesian framework. Frequentist and Bayesian approaches to statistics differ in their definitions of probability. Thus far, the majority of published network meta-analyses have used a Bayesian approach.

Bayesian analyses return the posterior probability distribution of all the model parameters given the data and prior beliefs (e.g., from external information) about the values of the parameters. They fully encapsulate the uncertainty in the parameter of interest and thus can make direct probability statements about these parameters (e.g., the probability that one intervention is superior to another).

Frequentist analyses calculate the probability that the observed data would have occurred under their sampling distribution for hypothesized values of the parameters. This approach to parameter estimation is more indirect than the Bayesian approach.

Bayesian methods have been criticized for their perceived complexity and the potential for subjectivity to be introduced by choice of a prior distribution that may affect study findings. Others argue that explicit use of a prior distribution makes transparent how individuals can interpret the same data differently. Despite these challenges, Bayesian methods offer considerable flexibility for statistical modeling. In-depth introductions to Bayesian methods and discussion of these and other issues can be found elsewhere.



### **Appendix Box 3. Network Meta-Analysis and Assessment of Consistency**

Network meta-analysis often involves the combination of direct and indirect evidence. In the simplest case, we wish to compare treatments A and B and have 2 sources of information: direct evidence via studies comparing A versus B, and indirect evidence via groups of studies comparing A and B with a common intervention, C. Together, this evidence forms a closed loop, ABC.

Direct and indirect evidence for a comparison of interventions should be combined only when their findings are similar in magnitude and interpretation. For example, for a comparison of mortality rates between A and B, an odds ratio determined from studies of A versus B should be similar to the odds ratio comparing A versus B estimated indirectly based on studies of A versus C and B versus C. This assumption of comparability of direct and indirect evidence is referred to as *consistency* of treatment effects.

When a treatment network contains a closed loop of interventions, it is possible to examine statistically whether there is agreement between the direct and indirect estimates of intervention effect.

Different methods to evaluate potential differences in relative treatment effects estimated by direct and indirect comparisons are grouped as *local approaches* and *global approaches*. Local approaches (e.g., the Bucher method or the node-splitting method) assess the presence of inconsistency for a particular pairwise comparison in the network, whereas global approaches (e.g., inconsistency models,  $I^2$  measure for inconsistency) consider the potential for inconsistency in the network as a whole.

Tests for inconsistency can have limited power to detect a true difference between direct and indirect evidence. When multiple loops are being tested for inconsistency, one or a few may show inconsistency simply by chance. Further discussions of consistency and related concepts are available elsewhere.

Inconsistency in a treatment network can indicate lack of transitivity (see **Appendix Box 1**).

#### **Appendix Box 4. Network Geometry and Considerations for Bias**

The term *network geometry* is used to refer to the architecture of the treatment comparisons that have been made for the condition under study. This includes what treatments are involved in the comparisons in a network, in what abundance they are present, the respective numbers of patients randomly assigned to each treatment, and whether particular treatments and comparisons may have been preferred or avoided.

Networks may take on different shapes. Poorly connected networks depend extensively on indirect comparisons. Meta-analyses of such networks may be less reliable than those from networks where most treatments have been compared against each other.

Qualitative description of network geometry should be provided and accompanied by a network graph. Quantitative metrics assessing features of network geometry, such as *diversity* (related to the number of treatments assessed and the balance of evidence among them), *co-occurrence* (related to whether comparisons between certain treatments are more or less common), and *homophily* (related to the extent of comparisons between treatments in the same class versus competing classes), can also be mentioned.

Although common, established steps for reviewing network geometry do not yet exist, however examples of in-depth evaluations have been described related to treatments for tropical diseases and basal cell carcinoma and may be of interest to readers. An example based on 75 trials of treatments for pulmonary arterial hypertension (**Appendix Figure 3**) suggests that head-to-head studies of active therapies may prove useful to further strengthen confidence in interpretation of summary estimates of treatment comparisons.

### **Appendix Box 5. Probabilities and Rankings in Network Meta-Analysis**

Systematic reviews incorporating network meta-analyses can provide information about the hierarchy of competing interventions in terms of treatment rankings.

The term *treatment ranking probabilities* refers to the probabilities estimated for each treatment in a network of achieving a particular placement in an ordering of treatment effects from best to worst. A network of 10 treatments provides a total of 100 ranking probabilities—that is, for each intervention, the chance of being ranked first, second, third, fourth, fifth, and so forth).

Several techniques are feasible to summarize relative rankings, and include graphical tools as well as different approaches for estimating ranking probabilities. **Appendix Figure 6** shows 2 approaches to presenting such information, on the basis of a comparison of adjuvant interventions for resected pancreatic adenocarcinoma.

Robust reporting of rankings also includes specifying median ranks with uncertainty intervals, cumulative probability curves, and the surface under the cumulative ranking (SUCRA) curve.

Rankings can be reported along with corresponding estimates of pairwise comparisons between interventions. Rankings should be reported with probability estimates to minimize misinterpretation from focusing too much on the most likely rank.

Rankings may exaggerate small differences in relative effects, especially if they are based on limited information. An objective assessment of the strength of information in the network and the magnitude of absolute benefits should accompany rankings to minimize potential biases.

EW Only

**Appendix Figure 1A-1C**

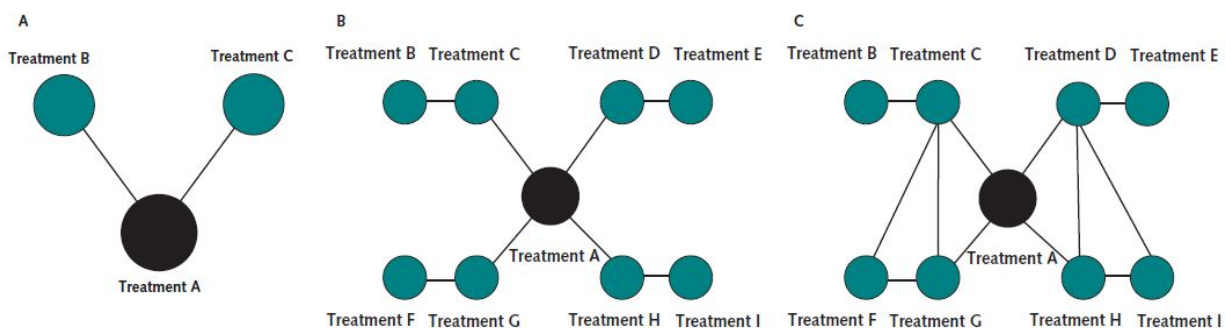

**Appendix Figure 3**

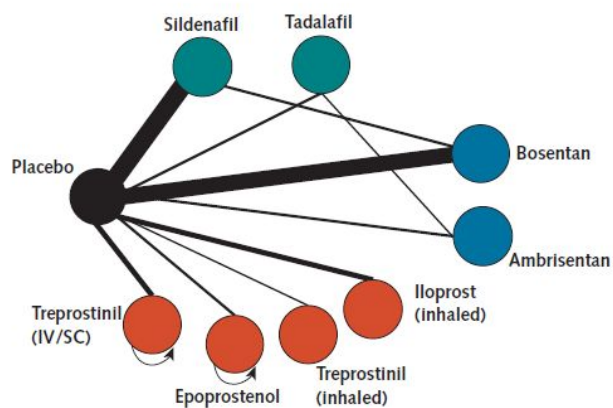

**Appendix Figure 6**

| Ranking | Treatment and Coresponding Ranking Probabilities<br>Grade 3 or 4 Hematologic Toxicity |             |                          |                                 |
|---------|---------------------------------------------------------------------------------------|-------------|--------------------------|---------------------------------|
|         | 5-FU                                                                                  | Gemcitabine | Chemoradiation<br>+ 5-FU | Chemoradiation<br>+ gemcitabine |
| 1       | 0.42                                                                                  | 0.42        | 0.15                     | 0.01                            |
| 2       | 0.46                                                                                  | 0.36        | 0.15                     | 0.02                            |
| 3       | 0.10                                                                                  | 0.17        | 0.68                     | 0.04                            |
| 4       | 0.02                                                                                  | 0.05        | 0.02                     | 0.93                            |

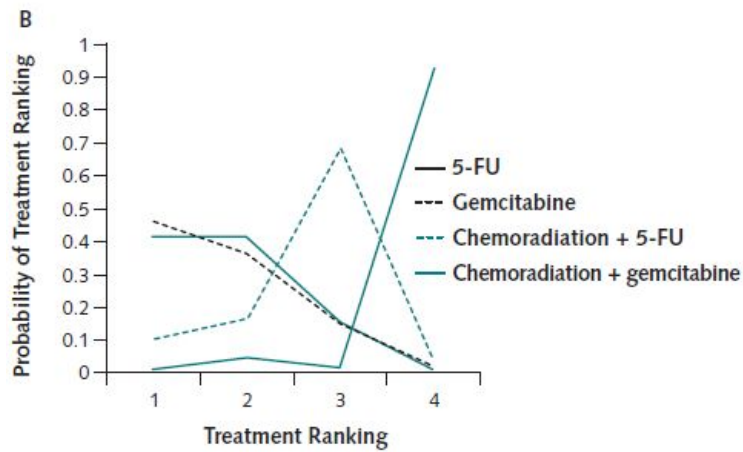

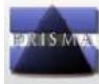

# PRISMA 2009 Checklist

| Section/topic                      | #  | Checklist item                                                                                                                                                                                                                                                                                              | Reported on page # |
|------------------------------------|----|-------------------------------------------------------------------------------------------------------------------------------------------------------------------------------------------------------------------------------------------------------------------------------------------------------------|--------------------|
| <b>TITLE</b>                       |    |                                                                                                                                                                                                                                                                                                             |                    |
| Title                              | 1  | Identify the report as a systematic review, meta-analysis, or both.                                                                                                                                                                                                                                         | 1                  |
| <b>ABSTRACT</b>                    |    |                                                                                                                                                                                                                                                                                                             |                    |
| Structured summary                 | 2  | Provide a structured summary including, as applicable: background; objectives; data sources; study eligibility criteria, participants, and interventions; study appraisal and synthesis methods; results; limitations; conclusions and implications of key findings; systematic review registration number. | 2                  |
| <b>INTRODUCTION</b>                |    |                                                                                                                                                                                                                                                                                                             |                    |
| Rationale                          | 3  | Describe the rationale for the review in the context of what is already known.                                                                                                                                                                                                                              | 4-7                |
| Objectives                         | 4  | Provide an explicit statement of questions being addressed with reference to participants, interventions, comparisons, outcomes, and study design (PICOS).                                                                                                                                                  | 7                  |
| <b>METHODS</b>                     |    |                                                                                                                                                                                                                                                                                                             |                    |
| Protocol and registration          | 5  | Indicate if a review protocol exists, if and where it can be accessed (e.g., Web address), and, if available, provide registration information including registration number.                                                                                                                               | 7                  |
| Eligibility criteria               | 6  | Specify study characteristics (e.g., PICOS, length of follow-up) and report characteristics (e.g., years considered, language, publication status) used as criteria for eligibility, giving rationale.                                                                                                      | 7-10               |
| Information sources                | 7  | Describe all information sources (e.g., databases with dates of coverage, contact with study authors to identify additional studies) in the search and date last searched.                                                                                                                                  | 10                 |
| Search                             | 8  | Present full electronic search strategy for at least one database, including any limits used, such that it could be repeated.                                                                                                                                                                               | Appendix A         |
| Study selection                    | 9  | State the process for selecting studies (i.e., screening, eligibility, included in systematic review, and, if applicable, included in the meta-analysis).                                                                                                                                                   | 10                 |
| Data collection process            | 10 | Describe method of data extraction from reports (e.g., piloted forms, independently, in duplicate) and any processes for obtaining and confirming data from investigators.                                                                                                                                  | 11-13              |
| Data items                         | 11 | List and define all variables for which data were sought (e.g., PICOS, funding sources) and any assumptions and simplifications made.                                                                                                                                                                       | 11-13              |
| Risk of bias in individual studies | 12 | Describe methods used for assessing risk of bias of individual studies (including specification of whether this was done at the study or outcome level), and how this information is to be used in any data synthesis.                                                                                      | 15-16              |
| Summary measures                   | 13 | State the principal summary measures (e.g., risk ratio, difference in means).                                                                                                                                                                                                                               | 16-18              |
| Synthesis of results               | 14 | Describe the methods of handling data and combining results of studies, if done, including measures of consistency (e.g., I <sup>2</sup> for each meta-analysis) <a href="http://bmjopen.bmj.com/site/about/guidelines.xhtml">http://bmjopen.bmj.com/site/about/guidelines.xhtml</a>                        | 16-18              |

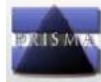

# PRISMA 2009 Checklist

Page 1 of 2

| Section/topic                 | #  | Checklist item                                                                                                                                                                                           | Reported on page #   |
|-------------------------------|----|----------------------------------------------------------------------------------------------------------------------------------------------------------------------------------------------------------|----------------------|
| Risk of bias across studies   | 15 | Specify any assessment of risk of bias that may affect the cumulative evidence (e.g., publication bias, selective reporting within studies).                                                             | 20                   |
| Additional analyses           | 16 | Describe methods of additional analyses (e.g., sensitivity or subgroup analyses, meta-regression), if done, indicating which were pre-specified.                                                         | 17-20                |
| <b>RESULTS</b>                |    |                                                                                                                                                                                                          |                      |
| Study selection               | 17 | Give numbers of studies screened, assessed for eligibility, and included in the review, with reasons for exclusions at each stage, ideally with a flow diagram.                                          | N/A – protocol paper |
| Study characteristics         | 18 | For each study, present characteristics for which data were extracted (e.g., study size, PICOS, follow-up period) and provide the citations.                                                             | N/A – protocol paper |
| Risk of bias within studies   | 19 | Present data on risk of bias of each study and, if available, any outcome level assessment (see item 12).                                                                                                | N/A – protocol paper |
| Results of individual studies | 20 | For all outcomes considered (benefits or harms), present, for each study: (a) simple summary data for each intervention group (b) effect estimates and confidence intervals, ideally with a forest plot. | N/A – protocol paper |
| Synthesis of results          | 21 | Present results of each meta-analysis done, including confidence intervals and measures of consistency.                                                                                                  | N/A – protocol paper |
| Risk of bias across studies   | 22 | Present results of any assessment of risk of bias across studies (see Item 15).                                                                                                                          | N/A – protocol paper |
| Additional analysis           | 23 | Give results of additional analyses, if done (e.g., sensitivity or subgroup analyses, meta-regression [see Item 16]).                                                                                    | N/A – protocol paper |
| <b>DISCUSSION</b>             |    |                                                                                                                                                                                                          |                      |
| Summary of evidence           | 24 | Summarize the main findings including the strength of evidence for each main outcome; consider their relevance to key groups (e.g., healthcare providers, users, and policy makers).                     | N/A – protocol paper |
| Limitations                   | 25 | Discuss limitations at study and outcome level (e.g., risk of bias), and at review-level (e.g., incomplete retrieval of identified research, reporting bias).                                            | N/A – protocol paper |
| Conclusions                   | 26 | Provide a general interpretation of the results in the context of other evidence, and implications for future research.                                                                                  | N/A – protocol paper |



# PRISMA 2009 Checklist

| FUNDING |    |                                                                                                                                            |    |
|---------|----|--------------------------------------------------------------------------------------------------------------------------------------------|----|
| Funding | 27 | Describe sources of funding for the systematic review and other support (e.g., supply of data); role of funders for the systematic review. | 22 |

From: Moher D, Liberati A, Tetzlaff J, Altman DG, The PRISMA Group (2009). Preferred Reporting Items for Systematic Reviews and Meta-Analyses: The PRISMA Statement. PLoS Med 6(6): e1000097. doi:10.1371/journal.pmed1000097

For more information, visit: [www.prisma-statement.org](http://www.prisma-statement.org).

Page 2 of 2

For peer review only
